# Supplementary material for: Manganese- and rhenium-catalyzed C–H enaminylation: expedient access to novel indole–purine hybrids with anti-tumor bioactivities
Source: Royal Society of Chemistry journal article supplement (doi:10.1039/d0qo01120g), 2020-01-01

## Supporting Information

### **Manganese- and Rhenium-Catalyzed C–H Enaminylation: Expedient Access to Novel Indole-purine Hybrids with Anti-Tumor Bioactivities**

Zhongnan Xu,<sup>†a</sup> Yuqing Wang,<sup>†a</sup> Yucheng Zheng,<sup>a</sup> Zhixing Huang,<sup>a</sup>  
Lutz Ackermann,<sup>b,c</sup> and Zhixiong Ruan<sup>\*a</sup>

<sup>a</sup>The Fifth Affiliated Hospital, Key Laboratory of Molecular Target & Clinical Pharmacology and the State Key Laboratory of Respiratory Disease, School of Pharmaceutical Sciences, Guangzhou Medical University, Guangzhou, 511436, P.R.China

E-mail: [zruan@gzhmu.edu.cn](mailto:zruan@gzhmu.edu.cn)

<sup>b</sup>Institut für Organische und Biomolekulare Chemie, Georg-August-Universität Göttingen, Tammannstraße 2, 37077 Göttingen, Germany

<sup>c</sup>WISCh (Wöhler-Research Institute for Sustainable Chemistry), Georg-August-Universität Göttingen, Tammannstraße 2, Göttingen 37077, Germany

<sup>†</sup>These authors contributed equally to this work.

## Table of Contents

|                                                                                        |      |
|----------------------------------------------------------------------------------------|------|
| General Remarks                                                                        | S-2  |
| General Procedure <b>A</b> for the Preparation of Substrates <b>1</b>                  | S-3  |
| Characterization Data of Substrates <b>1</b>                                           | S-5  |
| Optimization Studies                                                                   | S-12 |
| General Procedure for Mn- and Re-Catalyzed C–H Enaminylation                           | S-14 |
| Characterization Data of Products <b>3</b>                                             | S-15 |
| Gram-scale Synthesis                                                                   | S-30 |
| Intermolecular Competition Experiments                                                 | S-31 |
| H/D Exchange Experiment                                                                | S-32 |
| Radical Scavenger Experiment                                                           | S-33 |
| C–H Enaminylation with Cyclometalated Complex <b>5a</b>                                | S-34 |
| Synthetic Procedure and Characterization Data for <b>6</b>                             | S-36 |
| Synthetic Procedure and Characterization Data for <b>7</b>                             | S-41 |
| MTT Assay                                                                              | S-45 |
| Crystallographic Details of compounds <b>3aa</b> , <b>5a</b> , <b>6b</b> and <b>7a</b> | S-48 |
| References                                                                             | S-66 |
| <sup>1</sup> H, <sup>13</sup> C, and <sup>19</sup> F NMR Spectra                       | S-67 |

## General Remarks

Catalytic reactions were performed under N<sub>2</sub> atmosphere using pre-dried glassware and standard Schlenk techniques. The substrates **1a-1n**<sup>[1]</sup> were first synthesized by a method we modified based on previous research. The substrates **2a-2f**<sup>[1]</sup> were synthesized according to previously described methods. Other chemicals were obtained from commercial sources and were used without further purification. Yields refer to isolated compounds, estimated to be >95% pure as determined by <sup>1</sup>H-NMR. TLC: Macherey-Nagel, TLC plates Alugram®Sil G/UV254. Detection under UV light at 254 nm. Chromatography separations were carried out on silica gel 60H (200-300 mesh) manufactured by Qingdao Haiyang Chemical Group Co. (China). High resolution mass spectrometry (HRMS) was measured on Thermo-DFS mass spectrometer. NMR spectra were recorded on JEOL 400 NMR (<sup>1</sup>H 400 MHz; <sup>13</sup>C 100 MHz; <sup>19</sup>F 376 MHz) in CDCl<sub>3</sub>. If not otherwise specified, chemical shifts (δ) are given in ppm.

## General Procedure A for the Preparation of Substrates 1.

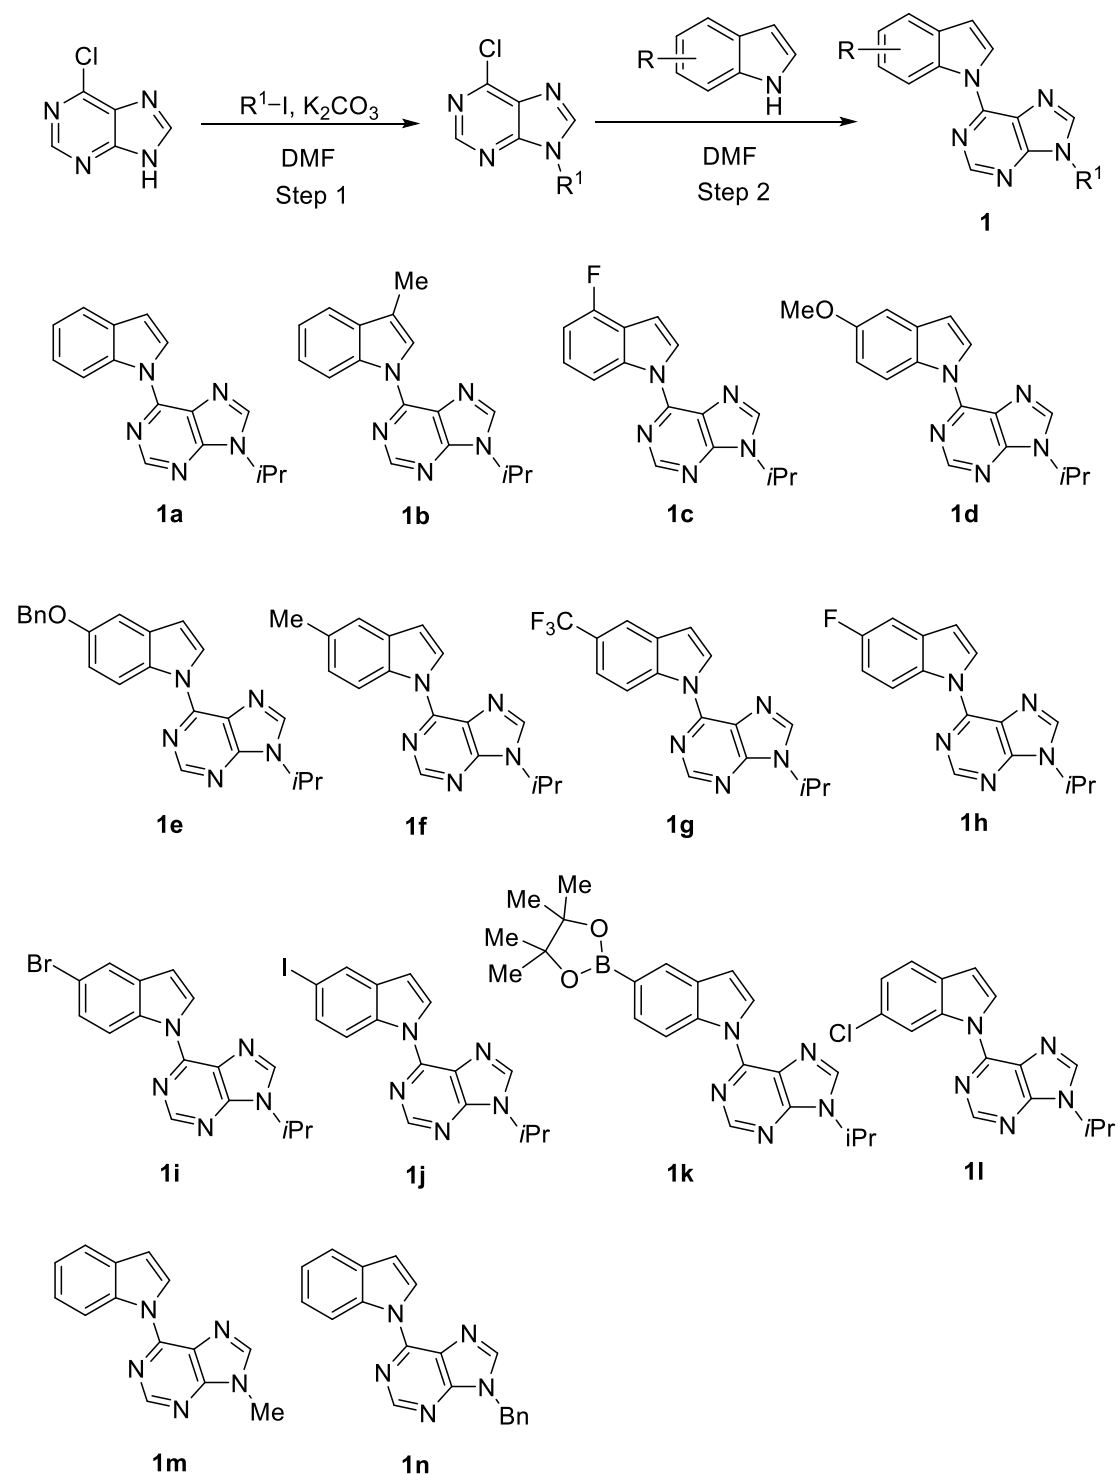

Compounds **1a-1n** were prepared according to the following method.

**Step 1:** Following a modified procedure by the reported lecture<sup>[1]</sup>. A stirred suspension of sodium hydride (60%, in mineral oil, 620 mg, 16.61 mmol) in DMF (30



mL) was treated with 6-chloro-9*H*-purine (2.0 g, 12.94 mmol) under N<sub>2</sub> atmosphere at room temperature for 2 h. Alkyl halide (16.54 mmol) was added to the reaction mixture, and the resultant was stirred at room temperature for 4 h. The mixture was poured into water (100 mL), and stirred for ten minutes. The mixture was coarsely filtered, the residue was washed with petroleum ether. The residue was dried under vacuum for half an hour and then recrystallized to give the title compound.

**Step 2:** NaH (60% dispersion in mineral oil, 180 mg, 4.5 mmol) was added in portions at 0 °C to a stirred solution of indole (1.59 g, 3.6 mmol) in DMF (30 mL). After stirring for 30 min at 0 °C, alkyl derivative (3 mmol) was added and the mixture was stirred at room temperature for 20 h. Then, the reaction mixture was poured into H<sub>2</sub>O (100 mL) and extracted with EtOAc (4×50 mL). The combined organic phase was dried over Na<sub>2</sub>SO<sub>4</sub>. After filtration and evaporation of the solvents under reduced pressure, the crude product was purified by column chromatography on silica gel to give the desired product **1**.

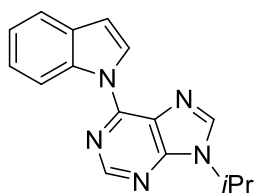

**6-(1H-Indol-1-yl)-9-isopropyl-9H-purine (1a):** Following the general procedure **A** afforded **1a** (749 mg, 90 %) as a white solid.  $^1\text{H}$  NMR (400 MHz,  $\text{CDCl}_3$ )  $\delta$  = 9.18 (d,  $J$  = 3.7 Hz, 1H), 9.06 (d,  $J$  = 8.3 Hz, 1H), 8.83 (s, 1H), 8.07 (s, 1H), 7.64 (d,  $J$  = 7.7 Hz, 1H), 7.41 – 7.33 (m, 1H), 7.30 – 7.24 (m, 1H), 6.80 (d,  $J$  = 3.7 Hz, 1H), 5.01 – 4.91 (m, 1H), 1.66 (d,  $J$  = 6.8 Hz, 6H).  $^{13}\text{C}$  NMR (100 MHz,  $\text{CDCl}_3$ )  $\delta$  = 152.4, 151.8, 150.0, 140.2, 136.2, 130.8, 128.7, 124.0, 123.0, 122.9, 120.9, 117.3, 108.5, 47.5, 22.7. HR-MS (ESI)  $m/z$  calcd for  $\text{C}_{16}\text{H}_{16}\text{N}_5$   $[\text{M}+\text{H}]^+$  278.1400, found 278.1394.

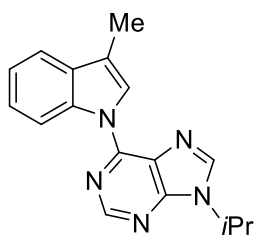

**9-Isopropyl-6-(3-methyl-1H-indol-1-yl)-9H-purine (1b):** Following the general procedure **A** afforded **1b** (566 mg, 65 %) as a white solid.  $^1\text{H}$  NMR (400 MHz,  $\text{CDCl}_3$ )  $\delta$  = 9.05 (d,  $J$  = 8.3 Hz, 1H), 8.95 (d,  $J$  = 1.2 Hz, 1H), 8.80 (s, 1H), 8.07 (s, 1H), 7.58 (d,  $J$  = 7.7 Hz, 1H), 7.40 – 7.36 (m, 1H), 7.32 – 7.28 (m, 1H), 4.96 (hept,  $J$  = 6.8 Hz, 1H), 2.41 (d,  $J$  = 1.3 Hz, 3H), 1.66 (d,  $J$  = 6.8 Hz, 6H).  $^{13}\text{C}$  NMR (100 MHz,  $\text{CDCl}_3$ )  $\delta$  = 152.2, 151.8, 149.9, 139.8, 136.5, 136.4, 131.7, 125.3, 124.0, 122.6, 118.8, 117.8, 117.4, 47.4, 22.7, 10.0. HR-MS (ESI)  $m/z$  calcd for  $\text{C}_{17}\text{H}_{18}\text{N}_5$   $[\text{M}+\text{H}]^+$  292.1557, found 292.1548.

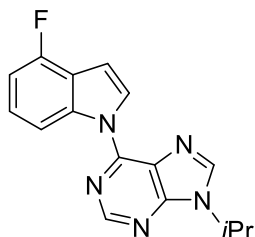

**6-(4-Fluoro-1*H*-indol-1-yl)-9-isopropyl-9*H*-purine (1c):** Following the general procedure **A** afforded **1c** (800 mg, 91 %) as a white solid.  $^1\text{H}$  NMR (400 MHz,  $\text{CDCl}_3$ )  $\delta$  = 9.16 (d,  $J$  = 3.8 Hz, 1H), 8.84 – 8.81 (m, 2H), 8.10 (s, 1H), 7.31 – 7.25 (m, 1H), 6.98 – 6.92 (m, 1H), 6.89 (dd,  $J$  = 3.7, 0.6 Hz, 1H), 4.97 (hept,  $J$  = 6.8 Hz, 1H), 1.67 (d,  $J$  = 6.8 Hz, 6H).  $^{13}\text{C}$  NMR (100 MHz,  $\text{CDCl}_3$ )  $\delta$  = 155.9 (d,  $^1J_{\text{C-F}}$  = 247.7 Hz), 152.5, 151.7, 149.7, 140.5, 138.3 (d,  $^3J_{\text{C-F}}$  = 10.5 Hz), 128.7, 124.5 (d,  $^3J_{\text{C-F}}$  = 6.3 Hz), 123.0, 119.5 (d,  $^2J_{\text{C-F}}$  = 22.0 Hz), 113.4 (d,  $^4J_{\text{C-F}}$  = 3.3 Hz), 108.0 (d,  $^2J_{\text{C-F}}$  = 16.4 Hz), 103.8, 47.6, 22.7.  $^{19}\text{F}$  NMR (376 MHz,  $\text{CDCl}_3$ )  $\delta$  = -122.36. HR-MS (ESI)  $m/z$  calcd for  $\text{C}_{16}\text{H}_{15}\text{FN}_5$  [ $\text{M}+\text{H}$ ] $^+$  296.1306, found 296.1298.

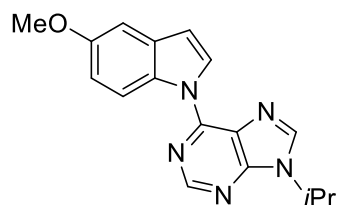

**9-Isopropyl-6-(5-methoxy-1*H*-indol-1-yl)-9*H*-purine (1d):** Following the general procedure **A** afforded **1d** (335 mg, 56 %) as a white solid.  $^1\text{H}$  NMR (400 MHz,  $\text{CDCl}_3$ )  $\delta$  = 9.17 (d,  $J$  = 3.6 Hz, 1H), 8.96 (d,  $J$  = 9.1 Hz, 1H), 8.80 (s, 1H), 8.07 (s, 1H), 7.10 (d,  $J$  = 2.5 Hz, 1H), 6.99 (dd,  $J$  = 9.1, 2.6 Hz, 1H), 6.73 (d,  $J$  = 3.6 Hz, 1H), 4.96 (p,  $J$  = 6.8 Hz, 1H), 3.89 (s, 3H), 1.66 (d,  $J$  = 6.8 Hz, 6H).  $^{13}\text{C}$  NMR (100 MHz,  $\text{CDCl}_3$ )  $\delta$  = 156.1, 152.3, 151.8, 149.8, 140.0, 131.7, 131.1, 129.3, 122.7, 118.2, 112.7, 108.4, 103.3, 55.8, 47.4, 22.8. HR-MS (ESI)  $m/z$  calcd for  $\text{C}_{17}\text{H}_{18}\text{N}_5\text{O}$  [ $\text{M}+\text{H}$ ] $^+$  308.1506, found 308.1501.

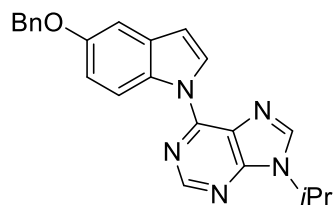

**6-[5-(Benzyloxy)-1*H*-indol-1-yl]-9-isopropyl-9*H*-purine (1e):** Following the general procedure **A** afforded **1e** (466 mg, 41 %) as a white solid.  $^1\text{H}$  NMR (400 MHz,  $\text{CDCl}_3$ )  $\delta$  = 9.18 (d,  $J$  = 3.6 Hz, 1H), 8.98 (d,  $J$  = 9.1 Hz, 1H), 8.81 (s, 1H), 8.07 (s, 1H), 7.50 (d,  $J$  = 7.4 Hz, 2H), 7.42 – 7.38 (m, 2H), 7.35 – 7.31 (m, 1H), 7.19 (d,  $J$  = 2.4 Hz, 1H),

7.08 (dd,  $J = 9.1, 2.4$  Hz, 1H), 6.73 (d,  $J = 3.6$  Hz, 1H), 5.16 (s, 2H), 4.97 (hept, 6.9Hz, 1H), 1.67 (d,  $J = 6.8$  Hz, 6H).  $^{13}\text{C}$  NMR (100 MHz,  $\text{CDCl}_3$ )  $\delta = 155.3, 152.3, 151.8, 149.8, 140.0, 137.6, 131.6, 131.2, 129.3, 128.7, 128.0, 127.7, 122.7, 118.2, 113.5, 108.5, 104.8, 70.7, 47.4, 22.7$ . HR-MS (ESI)  $m/z$  calcd for  $\text{C}_{23}\text{H}_{22}\text{N}_5\text{O}$   $[\text{M}+\text{H}]^+$  384.1819, found 384.1810.

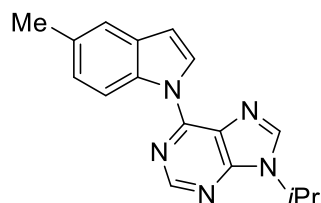

**9-Isopropyl-6-(5-methyl-1H-indol-1-yl)-9H-purine (1f):** Following the general procedure **A** afforded **1f** (610 mg, 70 %) as a white solid.  $^1\text{H}$  NMR (400 MHz,  $\text{CDCl}_3$ )  $\delta = 9.16$  (d,  $J = 3.6$  Hz, 1H), 8.93 (d,  $J = 8.5$  Hz, 1H), 8.82 (s, 1H), 8.08 (s, 1H), 7.43 (s, 1H), 7.19 (d,  $J = 8.4$  Hz, 1H), 6.73 (d,  $J = 3.6$  Hz, 1H), 4.97 (hept, 6.8 Hz, 1H), 2.48 (s, 3H), 1.66 (d,  $J = 6.8$  Hz, 6H).  $^{13}\text{C}$  NMR (100 MHz,  $\text{CDCl}_3$ )  $\delta = 152.3, 151.9, 150.0, 140.0, 134.5, 132.4, 131.0, 128.7, 125.4, 122.8, 120.8, 117.0, 108.3, 47.4, 22.7, 21.5$ . HR-MS (ESI)  $m/z$  calcd for  $\text{C}_{17}\text{H}_{18}\text{N}_5$   $[\text{M}+\text{H}]^+$  292.1557, found 292.1547.

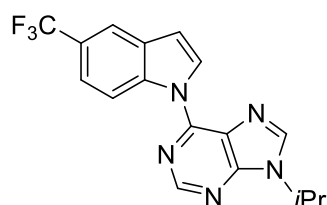

**9-Isopropyl-6-[5-(trifluoromethyl)-1H-indol-1-yl]-9H-purine (1g):** Following the general procedure **A** afforded **1g** (354 mg, 34 %) as a white solid.  $^1\text{H}$  NMR (400 MHz,  $\text{CDCl}_3$ )  $\delta = 9.27$  (d,  $J = 3.7$  Hz, 1H), 9.15 (d,  $J = 8.8$  Hz, 1H), 8.85 (s, 1H), 8.12 (s, 1H), 7.91 (s, 1H), 7.59 (dd,  $J = 8.8, 1.4$  Hz, 1H), 6.85 (d,  $J = 3.7$  Hz, 1H), 4.99 (hept,  $J = 6.8$  Hz, 1H), 1.68 (d,  $J = 6.8$  Hz, 6H).  $^{13}\text{C}$  NMR (100 MHz,  $\text{CDCl}_3$ )  $\delta = 152.7, 151.7, 149.5, 140.7, 137.6, 130.4, 130.3, 125.0$  (q,  $^2J_{\text{C-F}} = 31.9$  Hz), 123.7 (q,  $^1J_{\text{C-F}} = 272.5$  Hz), 123.0, 120.6 (q,  $^3J_{\text{C-F}} = 3.5$  Hz), 118.3 (q,  $^3J_{\text{C-F}} = 3.5$  Hz), 117.5, 108.4, 47.7, 22.7.  $^{19}\text{F}$  NMR (376 MHz,  $\text{CDCl}_3$ )  $\delta = -60.87$ . HR-MS (ESI)  $m/z$  calcd for  $\text{C}_{17}\text{H}_{15}\text{F}_3\text{N}_5$   $[\text{M}+\text{H}]^+$  346.1274, found 346.1268.

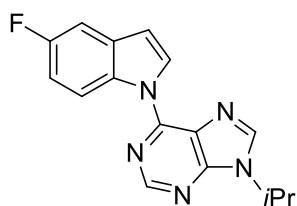

**6-(5-Fluoro-1H-indol-1-yl)-9-isopropyl-9H-purine (1h):** Following the general procedure **A** afforded **1h** (469 mg, 53 %) as a white solid.  $^1\text{H}$  NMR (400 MHz,  $\text{CDCl}_3$ )  $\delta$  = 9.23 (d,  $J$  = 3.6 Hz, 1H), 9.01 (dd,  $J$  = 9.1, 4.9 Hz, 1H), 8.80 (s, 1H), 8.08 (s, 1H), 7.28 – 7.25 (m, 1H), 7.09 – 7.05 (m, 1H), 6.74 (d,  $J$  = 3.6 Hz, 1H), 4.97 (hept,  $J$  = 6.8 Hz, 1H), 1.67 (d,  $J$  = 6.8 Hz, 6H).  $^{13}\text{C}$  NMR (100 MHz,  $\text{CDCl}_3$ )  $\delta$  = 159.4 (d,  $^1J_{\text{C-F}}$  = 238.6 Hz), 152.4, 151.7, 149.6, 140.3, 132.6, 131.6 (d,  $^3J_{\text{C-F}}$  = 10.7 Hz), 130.3, 122.8, 118.3 (d,  $^3J_{\text{C-F}}$  = 9.4 Hz), 111.6 (d,  $^2J_{\text{C-F}}$  = 24.9 Hz), 108.2 (d,  $^4J_{\text{C-F}}$  = 3.9 Hz), 106.1 (d,  $^2J_{\text{C-F}}$  = 23.3 Hz), 47.5, 22.7.  $^{19}\text{F}$  NMR (376 MHz,  $\text{CDCl}_3$ )  $\delta$  = -122.13, -122.16, -122.18. HR-MS (ESI)  $m/z$  calcd for  $\text{C}_{16}\text{H}_{15}\text{FN}_5$   $[\text{M}+\text{H}]^+$  296.1306, found 296.1299.

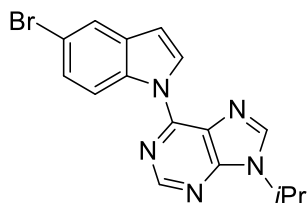

**6-(5-Bromo-1H-indol-1-yl)-9-isopropyl-9H-purine (1i):** Following the general procedure **A** afforded **1i** (829 mg, 78 %) as a pale yellow solid.  $^1\text{H}$  NMR (400 MHz,  $\text{CDCl}_3$ )  $\delta$  = 9.17 (d,  $J$  = 3.6 Hz, 1H), 8.91 (d,  $J$  = 8.9 Hz, 1H), 8.79 (s, 1H), 8.07 (s, 1H), 7.72 (d,  $J$  = 1.7 Hz, 1H), 7.41 (dd,  $J$  = 8.9, 1.8 Hz, 1H), 6.70 (d,  $J$  = 3.6 Hz, 1H), 4.95 (hept,  $J$  = 6.8 Hz, 1H), 1.66 (d,  $J$  = 6.8 Hz, 6H).  $^{13}\text{C}$  NMR (100 MHz,  $\text{CDCl}_3$ )  $\delta$  = 152.5, 151.7, 149.5, 140.4, 134.8, 132.4, 129.8, 126.6, 123.3, 122.8, 118.7, 116.1, 107.6, 47.6, 22.7. HR-MS (ESI)  $m/z$  calcd for  $\text{C}_{16}\text{H}_{15}\text{BrN}_5$   $[\text{M}+\text{H}]^+$  356.0505 ( $^{79}\text{Br}$ ), found 356.0499 ( $^{79}\text{Br}$ ).

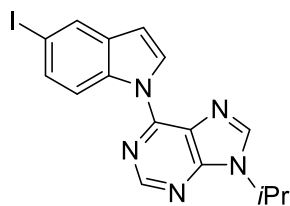

**6-(5-Iodo-1H-indol-1-yl)-9-isopropyl-9H-purine (1j):** Following the general procedure **A** afforded **Z-5** (616 mg, 51 %) as a white solid.  $^1\text{H}$  NMR (400 MHz,  $\text{CDCl}_3$ )  $\delta$  = 9.15 (d,  $J$  = 3.7 Hz, 1H), 8.84 – 8.80 (m, 2H), 8.09 (s, 1H), 7.95 (d,  $J$  = 1.6 Hz, 1H), 7.60 (dd,  $J$  = 8.8, 1.7 Hz, 1H), 6.70 (d,  $J$  = 3.6 Hz, 1H), 4.97 (hept,  $J$  = 6.8 Hz, 1H), 1.67 (d,  $J$  = 6.8 Hz, 6H).  $^{13}\text{C}$  NMR (100 MHz,  $\text{CDCl}_3$ )  $\delta$  = 152.5, 151.7, 149.6, 140.5, 135.4, 133.1, 132.3, 129.6, 129.5, 123.0, 119.2, 107.4, 87.0, 47.6, 22.7. HR-MS (ESI)  $m/z$  calcd for  $\text{C}_{16}\text{H}_{15}\text{IN}_5$   $[\text{M}+\text{H}]^+$  404.0367, found 404.0360.

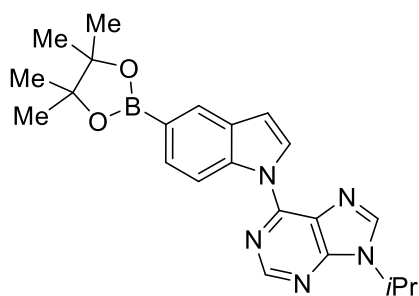

**9-isopropyl-6-[5-(4,4,5,5-tetramethyl-1,3,2-dioxaborolan-2-yl)-1H-indol-1-yl]-9H-purine (1k):** Following the general procedure **A** afforded **1k** (813 mg, 68 %) as a white solid.  $^1\text{H}$  NMR (400 MHz,  $\text{CDCl}_3$ )  $\delta$  = 9.17 (d,  $J$  = 3.7 Hz, 1H), 9.03 (d,  $J$  = 8.5 Hz, 1H), 8.84 (s, 1H), 8.15 (s, 1H), 8.07 (s, 1H), 7.81 (dd,  $J$  = 8.4, 1.0 Hz, 1H), 6.80 (d,  $J$  = 3.6 Hz, 1H), 4.95 (hept,  $J$  = 6.8 Hz, 1H), 1.65 (d,  $J$  = 6.8 Hz, 6H), 1.38 (s, 12H).  $^{13}\text{C}$  NMR (100 MHz,  $\text{CDCl}_3$ )  $\delta$  = 152.4, 151.8, 149.9, 140.3, 138.2, 130.4, 130.2, 128.7, 128.3, 123.1, 123.0, 116.6, 108.7, 83.7, 47.5, 25.0, 22.7. HR-MS (ESI)  $m/z$  calcd for  $\text{C}_{22}\text{H}_{27}\text{BN}_5\text{O}_2$   $[\text{M}+\text{H}]^+$  404.2252, found 404.2249.

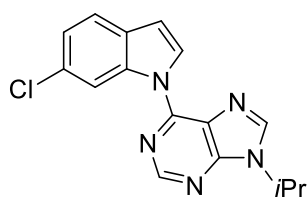

**6-(6-Chloro-1*H*-indol-1-yl)-9-isopropyl-9*H*-purine (1l):** Following the general procedure **A** afforded **1l** (800 mg, 85 %) as a pale yellow solid. <sup>1</sup>H NMR (400 MHz, CDCl<sub>3</sub>)  $\delta$  = 9.18 (d, *J* = 3.7 Hz, 1H), 9.13 (d, *J* = 1.9 Hz, 1H), 8.83 (s, 1H), 8.09 (s, 1H), 7.52 (d, *J* = 8.3 Hz, 1H), 7.24 (dd, *J* = 8.2, 1.9 Hz, 1H), 6.75 (dd, *J* = 3.7, 0.6 Hz, 1H), 4.97 (hept, *J* = 6.8 Hz, 1H), 1.67 (d, *J* = 6.8 Hz, 6H). <sup>13</sup>C NMR (100 MHz, CDCl<sub>3</sub>)  $\delta$  = 152.6, 151.8, 149.6, 140.5, 136.4, 129.7, 129.3, 129.2, 123.4, 122.8, 121.4, 117.5, 108.1, 47.6, 22.8. HR-MS (ESI) *m/z* calcd for C<sub>16</sub>H<sub>15</sub>ClN<sub>5</sub> [M+H]<sup>+</sup> 312.1010, found 312.1009.

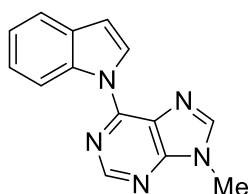

**6-(1*H*-indol-1-yl)-9-methyl-9*H*-purine (1m):** Following the general procedure **A** afforded **1m** (523 mg, 70 %) as a white solid. <sup>1</sup>H NMR (400 MHz, CDCl<sub>3</sub>)  $\delta$  = 9.11 (d, *J* = 2.9 Hz, 1H), 9.03 (d, *J* = 8.3 Hz, 1H), 8.79 (s, 1H), 7.86 (s, 1H), 7.62 (d, *J* = 7.6 Hz, 1H), 7.36 (t, *J* = 7.7 Hz, 1H), 7.29 – 7.24 (m, 1H), 6.77 (d, *J* = 3.6 Hz, 1H), 3.79 (s, 3H). <sup>13</sup>C NMR (100 MHz, CDCl<sub>3</sub>)  $\delta$  = 152.9, 152.1, 149.8, 143.0, 136.1, 130.8, 128.6, 124.0, 122.9, 122.2, 120.8, 117.4, 108.5, 30.0. HR-MS (ESI) *m/z* calcd for C<sub>14</sub>H<sub>12</sub>N<sub>5</sub> [M+H]<sup>+</sup> 250.1087, found 250.1081.

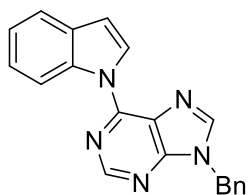

**9-Benzyl-6-(1*H*-indol-1-yl)-9*H*-purine (1n):** Following the general procedure **A** afforded **1n** (580 mg, 60 %) as a white solid. <sup>1</sup>H NMR (400 MHz, CDCl<sub>3</sub>)  $\delta$  = 9.17 (d, *J* = 3.7 Hz, 1H), 9.09 (d, *J* = 8.5 Hz, 1H), 8.86 (s, 1H), 7.94 (s, 1H), 7.65 (d, *J* = 7.7 Hz, 1H), 7.40 – 7.29 (m, 7H), 6.80 (d, *J* = 3.6 Hz, 1H). <sup>13</sup>C NMR (100 MHz, CDCl<sub>3</sub>)  $\delta$  = 152.8, 152.3, 150.0, 142.3, 136.2, 135.3, 130.8, 129.2, 128.7, 128.6, 127.9, 124.0,

123.0, 122.3, 120.9, 117.4, 108.6, 47.4. HR-MS (ESI)  $m/z$  calcd for  $C_{20}H_{16}N_5 [M+H]^+$   
326.1400, found 326.1394.



## Optimization Studies

**Table S2. Manganese-Catalyzed C–H Enaminylation**<sup>[a]</sup>

| Entry | X  | Y  | Solvent          | <i>T</i> (°C) | Yield (%) <sup>b</sup> |
|-------|----|----|------------------|---------------|------------------------|
| 1     | 10 | 20 | 1, 4-dioxane     | 40            | 95                     |
| 2     | 10 | 20 | 1, 4-dioxane     | 60            | 99                     |
| 3     | 10 | 20 | DMF              | 80            | 99                     |
| 4     | 10 | 20 | DCE              | 80            | 99                     |
| 5     | 10 | 20 | γ-Valerolactone  | 80            | 84                     |
| 6     | 10 | 20 | H <sub>2</sub> O | 80            | 98                     |
| 7     | 10 | 20 | H <sub>2</sub> O | 60            | 92                     |
| 8     | 10 | —  | H <sub>2</sub> O | 60            | 88                     |
| 9     | —  | 20 | H <sub>2</sub> O | 60            | 0                      |
| 10    | 5  | 10 | H <sub>2</sub> O | 60            | 73                     |
| 11    | 5  | 10 | H <sub>2</sub> O | 80            | 99 (95) <sup>c</sup>   |

<sup>[a]</sup>Reaction conditions: **1a** (0.25 mmol), **2a** (0.30 mmol), MnBr(CO)<sub>5</sub> (5 mol %), NaOAc (10 mol %), H<sub>2</sub>O (1.0 mL), 80 °C, N<sub>2</sub>, 16 h. <sup>[b]</sup>Yields of isolated product.

<sup>[c]</sup>Under air.

**Table S3. Rhenium-Catalyzed C–H Enaminylation**<sup>[a]</sup>

Reaction scheme: **1a** + **2a**  $\xrightarrow[\text{solvent, } T, 16 \text{ h}]{\text{Re}_2(\text{CO})_{10} \text{ (X mol \%), NaOAc (Y mol \% )}}$  **3aa**

| Entry | X   | Y  | Solvent         | <i>T</i> (°C) | Yield (%) <sup>b</sup> |
|-------|-----|----|-----------------|---------------|------------------------|
| 1     | 5   | 10 | 1, 4-dioxane    | 80            | 17                     |
| 2     | 5   | 10 | 1, 4-dioxane    | 100           | 66                     |
| 3     | 5   | 10 | 1, 4-dioxane    | 120           | 95                     |
| 4     | 5   | 20 | 1, 4-dioxane    | 120           | 99                     |
| 5     | 5   | 20 | γ-Valerolactone | 120           | 54                     |
| 6     | 5   | 20 | toluene         | 120           | 10                     |
| 7     | 5   | 20 | DCE             | 120           | 99                     |
| 8     | —   | 20 | 1, 4-dioxane    | 120           | 0                      |
| 9     | 5   | —  | 1, 4-dioxane    | 120           | 83                     |
| 10    | 2.5 | 20 | 1, 4-dioxane    | 120           | 99 (73) <sup>c</sup>   |

<sup>[a]</sup>Reaction conditions: **1a** (0.25 mmol), **2a** (0.30 mmol), Re<sub>2</sub>(CO)<sub>10</sub> (2.5 mol %), NaOAc (20 mol %), 1, 4-dioxane (1.0 mL), 120 °C, N<sub>2</sub>, 16 h. <sup>[b]</sup>Yields of isolated product. <sup>[c]</sup>Under air.

## General Procedure for Aqueous Manganese- and Rhenium-Catalyzed C–H Enaminylation Reactions

**General Procedure B:** In an oven-dried Schlenk tube equipped with a magnetic stirring bar, a mixture of substrate **1a** (0.25 mmol), **2a** (0.30 mmol), MnBr(CO)<sub>5</sub> (5.0 mol %, 3.4 mg), NaOAc (10 mol %, 2.1 mg), and H<sub>2</sub>O (1 mL) were added under N<sub>2</sub> atmosphere. The reaction mixture was stirred at 80 °C in oil bath for 16 hours. After completion of the reaction, the reaction mixture was poured into H<sub>2</sub>O (10 mL) and extracted with EtOAc (4×5 mL). The combined organic phase was dried with Na<sub>2</sub>SO<sub>4</sub>. After filtration and concentration under reduced pressure, the residue was purified by column chromatography on silica gel afforded the desired product **3**.

**General Procedure C:** In an oven-dried Schlenk tube equipped with a magnetic stirring bar, a mixture of substrate **1a** (0.25 mmol), **2a** (0.30 mmol), Re<sub>2</sub>(CO)<sub>10</sub> (2.5 mol %, 4.1 mg), NaOAc (20 mol %, 4.2 mg), and 1,4-dioxane (1 mL) were added under N<sub>2</sub> atmosphere. The reaction mixture was stirred at 120 °C in oil bath for 16 hours. After completion of the reaction, the reaction mixture was concentrated under reduced pressure. The residue was purified by column chromatography on silica gel afforded the desired product **3**.

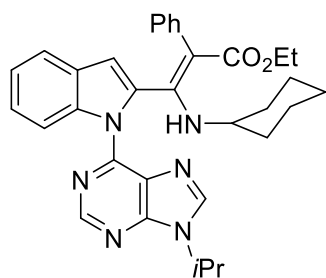

**Ethyl (Z)-3-(cyclohexylamino)-3-[1-(9-isopropyl-9H-purin-6-yl)-1H-indol-2-yl]-2-phenylacrylate (3aa):** The general procedure **B** was followed using substrate **1a** (0.25 mmol, 70 mg), **2a** (0.30 mmol, 82 mg). Isolation by column chromatography (PE/EtOAc: 5/1→3/1) yielded **3aa** (137 mg, 99%) as a yellow solid. Also, the general procedure **C** was followed to give **3aa** (137 mg, 99%). <sup>1</sup>H NMR (400 MHz, CDCl<sub>3</sub>)  $\delta$  = 9.44 (d,  $J$  = 9.6 Hz, 1H), 8.80 (s, 1H), 8.04 (s, 1H), 7.61 (d,  $J$  = 8.0 Hz, 1H), 7.56 (d,  $J$  = 6.6 Hz, 1H), 7.24 – 7.12 (m, 2H), 6.82 – 6.75 (m, 1H), 6.70 – 6.62 (m, 5H), 5.02 (hept,  $J$  = 6.8 Hz, 1H), 4.06 (q,  $J$  = 7.1 Hz, 2H), 3.33 – 3.20 (m, 1H), 1.95 – 1.86 (m, 1H), 1.73 (d,  $J$  = 6.8 Hz, 3H), 1.70 (d,  $J$  = 6.8 Hz, 3H), 1.68 – 1.64 (m, 1H), 1.60 – 1.52 (m, 2H), 1.43 (s, 2H), 1.40 – 1.34 (m, 1H), 1.20 – 1.14 (m, 2H), 1.11 (t,  $J$  = 7.1 Hz, 3H), 1.06 – 0.96 (m, 1H). <sup>13</sup>C NMR (100 MHz, CDCl<sub>3</sub>)  $\delta$  = 170.2, 155.2, 153.0, 151.5, 148.0, 141.1, 137.2, 136.3, 132.9, 131.2, 128.3, 126.6, 126.5, 125.2, 123.8, 122.0, 121.1, 113.4, 110.9, 98.5, 59.1, 53.8, 47.6, 35.4, 34.0, 27.0, 25.6, 24.7, 22.7, 14.5. HR-MS (ESI)  $m/z$  calcd for C<sub>33</sub>H<sub>37</sub>N<sub>6</sub>O<sub>2</sub> [M+H]<sup>+</sup> 549.2973, found 549.2964. The substrate of **3aa** was confirmed by single-crystal X-ray diffraction analysis.

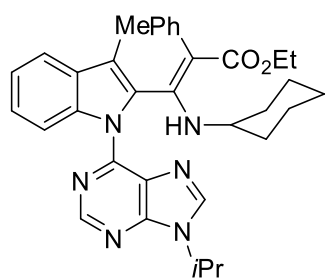

**Ethyl (Z)-3-(cyclohexylamino)-3-(1-(9-isopropyl-9H-purin-6-yl)-3-methyl-1H-indol-2-yl)-2-phenylacrylate (3ba):** The general procedure **B** was followed using substrate **1b** (0.25 mmol, 73 mg), **2a** (0.30 mmol, 82 mg). Isolation by column chromatography (PE/EtOAc: 5/1→3/1) yielded **3ba** (98 mg, 70%) as a yellow solid. Also, the general procedure **C** was followed to give **3ba** (63 mg, 45%). <sup>1</sup>H NMR (400 MHz, CDCl<sub>3</sub>)  $\delta$  = 9.38 (d,  $J$  = 10.0 Hz, 1H), 8.82 (s, 1H), 8.05 (s, 1H), 7.54 (d,  $J$  = 8.0

Hz, 1H), 7.47 (d,  $J = 7.1$  Hz, 1H), 7.23 – 7.14 (m, 2H), 6.85 (d,  $J = 7.0$  Hz, 2H), 6.81 – 6.77 (m, 1H), 6.72 – 6.68 (m, 2H), 5.02 (hept,  $J = 6.7$  Hz, 1H), 4.15 – 4.04 (m, 2H), 3.04 – 2.93 (m, 1H), 2.18 (s, 3H), 1.73 (d,  $J = 6.8$  Hz, 3H), 1.68 (d,  $J = 6.8$  Hz, 3H), 1.63 – 1.57 (m, 4H), 1.46 – 1.36 (m, 2H), 1.24 – 1.19 (m, 1H), 1.15 (t,  $J = 7.1$  Hz, 3H), 1.11 – 1.06 (m, 2H), 0.98 – 0.90 (m, 1H).  $^{13}\text{C}$  NMR (100 MHz,  $\text{CDCl}_3$ )  $\delta = 170.4$ , 154.5, 153.0, 151.7, 148.2, 141.0, 137.7, 136.0, 131.2, 129.6, 129.5, 126.5, 126.4, 125.1, 123.7, 121.5, 119.3, 117.1, 113.4, 99.6, 59.2, 53.5, 47.6, 35.3, 33.8, 25.6, 24.6, 24.5, 22.8, 22.7, 14.6, 9.8. HR-MS (ESI)  $m/z$  calcd for  $\text{C}_{34}\text{H}_{39}\text{N}_6\text{O}_2$   $[\text{M}+\text{H}]^+$  563.3120, found 563.3117.

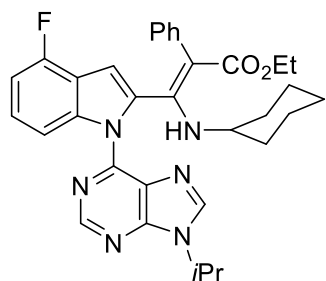

**Ethyl (Z)-3-(cyclohexylamino)-3-(4-fluoro-1-(9-isopropyl-9H-purin-6-yl)-1H-indol-1-yl)-2-phenylacrylate (3ca):** The general procedure **B** was followed using substrate **1c** (0.25 mmol, 75 mg), **2a** (0.30 mmol, 82 mg),. Isolation by column chromatography (PE/EtOAc: 3/1→1/1) yielded **3ca** (148 mg, 99%) as a pale yellow solid. Also, the general procedure **C** was followed to give **3ca** (121 mg, 86%).  $^1\text{H}$  NMR (400 MHz,  $\text{CDCl}_3$ )  $\delta = 9.41$  (d,  $J = 9.8$  Hz, 1H), 8.82 (s, 1H), 8.05 (s, 1H), 7.36 (d,  $J = 8.4$  Hz, 1H), 7.13 – 7.08 (m, 1H), 6.86 – 6.78 (m, 2H), 6.77 (s, 1H), 6.71 – 6.63 (m, 4H), 5.01 (hept,  $J = 6.8$  Hz, 1H), 4.06 (q,  $J = 7.1$  Hz, 2H), 3.28 – 3.17 (m, 1H), 1.94 – 1.88 (m, 1H), 1.72 (d,  $J = 6.8$  Hz, 3H), 1.69 (d,  $J = 6.8$  Hz, 3H), 1.59 – 1.49 (m, 2H), 1.48 – 1.39 (m, 2H), 1.39 – 1.34 (m, 1H), 1.20 – 1.14 (m, 2H), 1.11 (t,  $J = 7.2$  Hz, 3H), 1.06 – 0.93 (m, 1H), 0.92 – 0.80 (m, 1H).  $^{13}\text{C}$  NMR (100 MHz,  $\text{CDCl}_3$ )  $\delta = 170.1$ , 156.0 (d,  $^1J_{\text{C-F}} = 248.4$  Hz), 154.4, 153.1, 151.4, 147.6, 141.5, 138.3 (d,  $^3J_{\text{C-F}} = 9.6$  Hz), 137.0, 131.1, 133.0, 126.6, 126.5, 125.3, 124.2 (d,  $^3J_{\text{C-F}} = 7.2$  Hz), 117.5 (d,  $^2J_{\text{C-F}} = 23.7$  Hz), 109.5 (d,  $^4J_{\text{C-F}} = 3.4$  Hz), 106.8 (d,  $^2J_{\text{C-F}} = 17.9$  Hz), 106.1, 99.0, 59.1, 53.8, 47.7, 35.3, 33.9, 29.7, 25.5, 24.6, 22.6, 14.4.  $^{19}\text{F}$  NMR (376 MHz,

CDCl<sub>3</sub>)  $\delta$  = -121.93. HR-MS (ESI)  $m/z$  calcd for C<sub>33</sub>H<sub>36</sub>FN<sub>6</sub>O<sub>2</sub> [M+H]<sup>+</sup> 567.2878, found 567.2871.

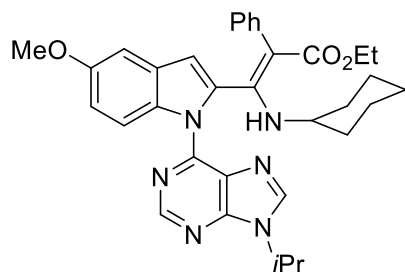

**Ethyl (Z)-3-(cyclohexylamino)-3-(1-(9-isopropyl-9H-purin-6-yl)-5-methoxy-1H-indol-2-yl)-2-phenylacrylate (3da):** The general procedure **B** was followed using substrate **1d** (0.25 mmol, 77 mg), **2a** (0.30 mmol, 82 mg). Isolation by column chromatography (PE/EtOAc: 5/1→3/1) yielded **3da** (143 mg, 99%) as a yellow solid. Also, the general procedure **C** was followed to give **3da** (78 mg, 54%). <sup>1</sup>H NMR (400 MHz, CDCl<sub>3</sub>)  $\delta$  = 9.45 (d,  $J$  = 9.8 Hz, 1H), 8.78 (s, 1H), 8.02 (s, 1H), 7.53 (d,  $J$  = 8.8 Hz, 1H), 7.01 (d,  $J$  = 2.5 Hz, 1H), 6.86 – 6.82 (m, 1H), 6.80 – 6.75 (m, 1H), 6.69 – 6.60 (m, 5H), 5.00 (hept,  $J$  = 6.0 Hz, 1H), 4.06 (q, 2H), 3.83 (s, 3H), 3.32 – 3.19 (m, 1H), 1.94 – 1.85 (m, 1H), 1.72 (d,  $J$  = 4.2 Hz, 3H), 1.68 (d, 3H), 1.67 – 1.62 (m, 1H), 1.60 – 1.53 (m, 2H), 1.51 – 1.30 (m, 3H), 1.21 – 1.14 (m, 2H), 1.11 (t,  $J$  = 7.1 Hz, 3H), 1.06 – 0.96 (m, 1H). <sup>13</sup>C NMR (100 MHz, CDCl<sub>3</sub>)  $\delta$  = 170.2, 155.5, 155.3, 152.9, 151.4, 147.9, 140.9, 137.3, 133.3, 131.2, 131.1, 129.0, 126.4, 126.3, 125.1, 114.4, 113.5, 110.7, 102.8, 98.3, 59.1, 55.8, 53.8, 47.5, 35.3, 34.0, 25.5, 24.7, 24.6, 22.7, 14.5. HR-MS (ESI)  $m/z$  calcd for C<sub>34</sub>H<sub>39</sub>N<sub>6</sub>O<sub>3</sub> [M+H]<sup>+</sup> 579.3078, found 579.3070.

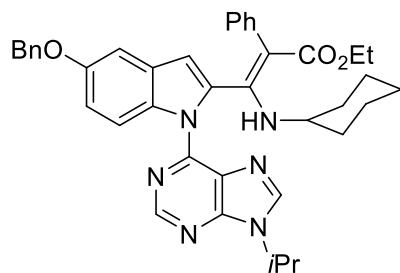

**Ethyl (Z)-3-(5-(benzyloxy)-1-(9-isopropyl-9H-purin-6-yl)-1H-indol-2-yl)-3-(cyclo**

**-hexylamino)-2-phenylacrylate (3ea):** The general procedure **B** was followed using substrate **1e** (0.25 mmol, 96 mg), **2a** (0.30 mmol, 82 mg). Isolation by column chromatography (PE/EtOAc: 5/1→3/1) yielded **3ea** (150 mg, 92%) as a yellow solid. Also, the general procedure **C** was followed to give **3ea** (140 mg, 86%). <sup>1</sup>H NMR (400 MHz, CDCl<sub>3</sub>)  $\delta$  = 9.44 (d, *J* = 9.8 Hz, 1H), 8.77 (s, 1H), 8.01 (s, 1H), 7.53 (d, *J* = 9.1 Hz, 1H), 7.46 (d, *J* = 7.0 Hz, 2H), 7.41 – 7.37 (m, 2H), 7.34 – 7.30 (m, 1H), 7.08 (d, *J* = 2.4 Hz, 1H), 6.92 (dd, *J* = 9.1, 2.6 Hz, 1H), 6.80 – 7.76 (m, 1H), 6.69 – 6.60 (m, 5H), 5.09 (s, 2H), 5.01 (p, *J* = 6.8 Hz, 1H), 4.05 (q, *J* = 7.0 Hz, 2H), 3.31 – 3.20 (m, 1H), 1.92 – 1.86 (m, 1H), 1.72 (d, *J* = 6.8 Hz, 3H), 1.69 (d, *J* = 6.8 Hz, 3H), 1.58 (s, 3H), 1.55 – 1.50 (m, 1H), 1.48 – 1.37 (m, 2H), 1.19 – 1.13 (m, 2H), 1.10 (t, *J* = 7.1 Hz, 3H), 1.08 – 0.93 (m, 1H). <sup>13</sup>C NMR (100 MHz, CDCl<sub>3</sub>)  $\delta$  = 170.2, 155.3, 154.8, 153.0, 151.5, 147.9, 141.0, 137.6, 137.3, 133.4, 131.4, 131.1, 129.0, 128.6, 127.9, 127.6, 126.4, 126.3, 125.2, 114.4, 114.2, 110.8, 104.2, 98.4, 70.7, 59.1, 53.8, 47.5, 35.4, 34.0, 27.0, 25.6, 24.7, 22.7, 14.5. HR-MS (ESI) *m/z* calcd for C<sub>40</sub>H<sub>43</sub>N<sub>6</sub>O<sub>3</sub> [M+H]<sup>+</sup> 655.3391, found 655.3381.

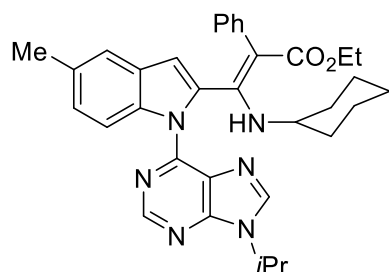

**Ethyl (Z)-3-(cyclohexylamino)-3-(1-(9-isopropyl-9H-purin-6-yl)-5-methyl-1H-indol-2-yl)-2-phenylacrylate (3fa):** The general procedure **B** was followed using substrate **1f** (0.25 mmol, 73 mg), **2a** (0.30 mmol, 82 mg). Isolation by column chromatography (PE/EtOAc: 5/1→3/1) yielded **3fa** (139 mg, 99%) as a yellow solid. Also, the general procedure **C** was followed to give **3fa** (137 mg, 98%). <sup>1</sup>H NMR (400 MHz, CDCl<sub>3</sub>)  $\delta$  = 9.45 (d, *J* = 9.7 Hz, 1H), 8.80 (s, 1H), 8.03 (s, 1H), 7.51 (d, *J* = 8.5 Hz, 1H), 7.35 (s, 1H), 7.03 (d, *J* = 8.6 Hz, 1H), 6.80 – 6.74 (m, 1H), 6.69 – 6.61 (m, 5H), 5.01 (hept, *J* = 6.8 Hz, 1H), 4.07 (q, *J* = 7.1 Hz, 2H), 3.31 – 3.02 (m, 1H), 2.42 (s, 3H), 1.93 – 1.86 (m, 1H), 1.72 (d, *J* = 6.8 Hz, 3H), 1.69 (d, *J* = 6.8 Hz, 3H),

1.67 – 1.61 (m, 1H), 1.59 – 1.53 (m, 2H), 1.44 (s, 2H), 1.38 – 1.34 (m, 1H), 1.21 – 1.14 (m, 2H), 1.11 (t,  $J = 7.1$  Hz, 3H), 1.06 – 0.98 (m, 1H).  $^{13}\text{C}$  NMR (100 MHz,  $\text{CDCl}_3$ )  $\delta = 170.2, 155.4, 152.9, 151.4, 148.0, 141.0, 137.3, 134.5, 132.7, 131.3, 131.1, 128.6, 126.4, 126.4, 125.3, 125.2, 120.7, 113.2, 110.5, 98.3, 59.0, 53.8, 47.5, 35.4, 34.0, 27.0, 25.6, 24.7, 22.7, 21.4, 14.5$ . HR-MS (ESI)  $m/z$  calcd for  $\text{C}_{34}\text{H}_{39}\text{N}_6\text{O}_2$   $[\text{M}+\text{H}]^+$  563.3119, found 563.3116.

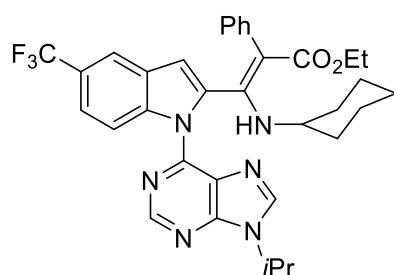

**Ethyl (Z)-3-(cyclohexylamino)-3-[1-(9-isopropyl-9H-purin-6-yl)-5-(trifluoromethyl)-1H-indol-2-yl]-2-phenylacrylate (3ga):** The general procedure **B** was followed using substrate **1g** (0.25 mmol, 88 mg), **2a** (0.30 mmol, 82 mg). Isolation by column chromatography (PE/EtOAc: 5/1→3/1) yielded **3ga** (88 mg, 57%) as a yellow solid. Also, the general procedure **C** was followed to give **3ga** (152 mg, 99%).  $^1\text{H}$  NMR (400 MHz,  $\text{CDCl}_3$ )  $\delta = 9.37$  (d,  $J = 9.8$  Hz, 1H), 8.85 (s, 1H), 8.07 (s, 1H), 7.86 (s, 1H), 7.64 (d,  $J = 8.7$  Hz, 1H), 7.42 (d,  $J = 8.8$  Hz, 1H), 6.82 – 6.77 (m, 1H), 6.73 (s, 1H), 6.71 – 6.65 (m, 4H), 5.03 (hept,  $J = 6.8$  Hz, 1H), 4.11 – 4.03 (m, 2H), 3.18 – 3.08 (m, 1H), 1.90 – 1.84 (m, 1H), 1.74 (d,  $J = 6.8$  Hz, 3H), 1.71 (d,  $J = 6.8$  Hz, 3H), 1.68 – 1.64 (m, 1H), 1.62 – 1.48 (m, 2H), 1.43 (s, 3H), 1.38 – 1.34 (m, 1H), 1.23 – 1.15 (m, 2H), 1.11 (t,  $J = 7.2$  Hz, 3H), 1.02 – 0.94 (m, 1H).  $^{13}\text{C}$  NMR (100 MHz,  $\text{CDCl}_3$ )  $\delta = 170.2, 154.1, 153.2, 151.6, 147.4, 141.8, 137.4, 137.1, 134.8, 131.2, 127.7, 126.7, 126.6, 125.5, 124.3$  (q,  $^2J_{\text{C-F}} = 33.0$  Hz), 123.7 (q,  $^1J_{\text{C-F}} = 272.3$  Hz), 120.4 (q,  $^3J_{\text{C-F}} = 3.0$  Hz), 118.8 (q,  $^3J_{\text{C-F}} = 4.1$  Hz), 113.8, 110.7, 99.2, 59.3, 54.0, 47.8, 35.4, 34.0, 27.0, 25.5, 24.7, 22.7, 14.5.  $^{19}\text{F}$  NMR (376 MHz,  $\text{CDCl}_3$ )  $\delta = -60.82$ . HR-MS (ESI)  $m/z$  calcd for  $\text{C}_{34}\text{H}_{36}\text{F}_3\text{N}_6\text{O}_2$   $[\text{M}+\text{H}]^+$  617.2845, found 617.2835.



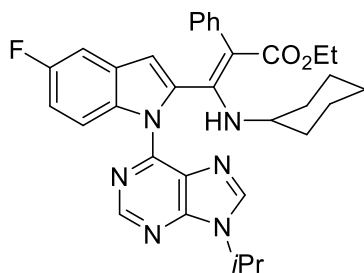

**Ethyl (Z)-3-(cyclohexylamino)-3-[5-fluoro-1-(9-isopropyl-9H-purin-6-yl)-1H-indol-2-yl]-2-phenylacrylate (3ha):** The general procedure **B** was followed using substrate **1h** (0.25 mmol, 75 mg), **2a** (0.30 mmol, 82 mg). Isolation by column chromatography (PE/EtOAc: 5/1→3/1) yielded **3ha** (106 mg, 75%) as a yellow solid. Also, the general procedure **C** was followed using substrate **1h** (0.25 mmol, 75 mg), **2a** (0.30 mmol, 82 mg),  $\text{Re}_2(\text{CO})_{10}$  (8.2 mg, 5.0 mol %) and NaOAc (4.2 mg, 20 mol %) to give **3ha** (107 mg, 76%).  $^1\text{H}$  NMR (400 MHz,  $\text{CDCl}_3$ )  $\delta$  = 9.40 (d,  $J$  = 9.7 Hz, 1H), 8.80 (s, 1H), 8.04 (s, 1H), 7.53 (dd,  $J$  = 9.1, 4.4 Hz, 1H), 7.19 (dd,  $J$  = 9.0, 2.5 Hz, 1H), 6.94 – 6.90 (m, 1H), 6.81 – 6.77 (m, 1H), 6.70 – 6.61 (m, 5H), 5.02 (hept,  $J$  = 6.7 Hz, 1H), 4.06 (q,  $J$  = 7.0 Hz, 2H), 3.25 – 3.13 (m, 1H), 1.92 – 1.82 (m, 1H), 1.73 (d,  $J$  = 6.8 Hz, 3H), 1.70 (d,  $J$  = 6.8 Hz, 3H), 1.65 – 1.62 (m, 1H), 1.60 – 1.50 (m, 2H), 1.49 – 1.30 (m, 3H), 1.21 – 1.14 (m, 2H), 1.10 (t,  $J$  = 7.1 Hz, 3H), 1.06 – 0.97 (m, 1H).  $^{13}\text{C}$  NMR (100 MHz,  $\text{CDCl}_3$ )  $\delta$  = 170.2, 158.9 (d,  $^1J_{\text{C-F}}$  = 237.7 Hz), 154.7, 153.1, 151.6, 147.7, 141.3, 137.2, 134.5, 132.6, 131.2, 128.9 (d,  $^3J_{\text{C-F}}$  = 9.2 Hz), 126.5, 126.5, 125.3, 114.5 (d,  $^3J_{\text{C-F}}$  = 10.3 Hz), 112.0 (d,  $^2J_{\text{C-F}}$  = 23.2 Hz), 110.5 (d,  $^4J_{\text{C-F}}$  = 2.3 Hz), 106.0 (d,  $^2J_{\text{C-F}}$  = 24.5 Hz), 98.7, 59.2, 53.9, 47.7, 35.4, 34.0, 25.6, 24.7, 22.8, 22.7, 14.5.  $^{19}\text{F}$  NMR (376 MHz,  $\text{CDCl}_3$ )  $\delta$  = -122.14 (t,  $J$  = 9.1 Hz). HR-MS (ESI)  $m/z$  calcd for  $\text{C}_{33}\text{H}_{36}\text{FN}_6\text{O}_2$   $[\text{M}+\text{H}]^+$  567.2876, found 567.2866.

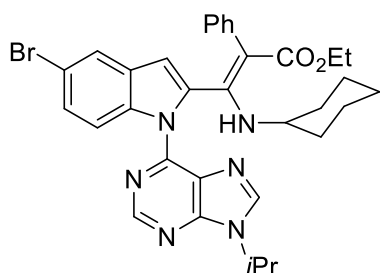

**Ethyl (Z)-3-[5-bromo-1-(9-isopropyl-9H-purin-6-yl)-1H-indol-2-yl]-3-(cyclohexyl**

**-amino)-2-phenylacrylate (3ia):** The general procedure **B** was followed using substrate **1i** (0.25 mmol, 90 mg), **2a** (0.30 mmol, 82 mg). Isolation by column chromatography (PE/EtOAc: 5/1→3/1) yielded **3ia** (147 mg, 94%) as a yellow solid. Also, the general procedure **C** was followed to give **3ia** (150 mg, 96%). <sup>1</sup>H NMR (400 MHz, CDCl<sub>3</sub>)  $\delta$  = 9.36 (d, *J* = 9.7 Hz, 1H), 8.80 (s, 1H), 8.03 (s, 1H), 7.67 (s, 1H), 7.45 (d, *J* = 8.9 Hz, 1H), 7.25 (d, *J* = 5.0 Hz, 1H), 6.78 (t, *J* = 6.8 Hz, 1H), 6.69 – 6.62 (m, 4H), 6.58 (s, 1H), 5.00 (hept, *J* = 6.6 Hz, 1H), 4.09 – 4.01 (m, 2H), 3.17 – 3.07 (m, 1H), 1.87 – 1.82 (m, 1H), 1.71 (d, *J* = 6.8 Hz, 3H), 1.68 (d, *J* = 6.8 Hz, 3H), 1.66 – 1.61 (m, 1H), 1.57 – 1.51 (m, 1H), 1.48 – 1.41 (m, 2H), 1.36 – 1.28 (m, 2H), 1.20 – 1.12 (m, 2H), 1.09 (t, *J* = 7.1 Hz, 3H), 1.03 – 0.95 (m, 1H). <sup>13</sup>C NMR (100 MHz, CDCl<sub>3</sub>)  $\delta$  = 170.1, 154.4, 153.1, 151.5, 147.5, 141.5, 137.1, 134.8, 134.1, 131.1, 129.9, 129.1, 128.2, 126.5, 125.3, 123.5, 115.2, 115.0, 109.8, 98.9, 59.2, 53.9, 47.7, 35.4, 33.9, 29.8, 25.5, 24.7, 22.7, 14.5. HR-MS (ESI) *m/z* calcd for C<sub>33</sub>H<sub>36</sub>BrN<sub>6</sub>O<sub>2</sub> [M+H]<sup>+</sup> 627.2078 (<sup>79</sup>Br), found 627.2070 (<sup>79</sup>Br).

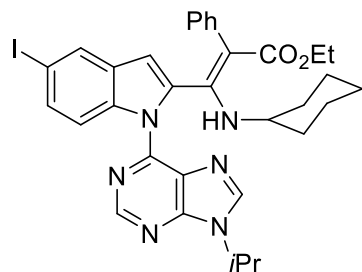

**Ethyl (Z)-3-(cyclohexylamino)-3-[5-iodo-1-(9-isopropyl-9H-purin-6-yl)-1H-indol-2-yl]-2-phenylacrylate (3ja):** The general procedure **B** was followed using substrate **1j** (0.25 mmol, 101 mg), **2a** (0.30 mmol, 82 mg). Isolation by column chromatography (PE/EtOAc: 5/1→3/1) yielded **3ja** (165 mg, 99%) as a yellow solid. Also, the general procedure **C** was followed to give **3ja** (107 mg, 64%). <sup>1</sup>H NMR (400 MHz, CDCl<sub>3</sub>)  $\delta$  = 9.36 (d, *J* = 9.8 Hz, 1H), 8.81 (s, 1H), 8.04 (s, 1H), 7.89 (d, *J* = 8.8 Hz, 1H), 7.43 (dd, *J* = 8.8, 1.6 Hz, 1H), 7.37 – 7.34 (m, 1H), 6.81 – 6.75 (m, 1H), 6.71 – 6.63 (m, 4H), 6.58 (s, 1H), 5.01 (hept, *J* = 6.8 Hz, 1H), 4.08 – 4.02 (m, 2H), 3.19 – 3.08 (m, 1H), 1.88 – 1.83 (m, 1H), 1.72 (d, *J* = 6.8 Hz, 3H), 1.69 (d, *J* = 6.8 Hz, 3H), 1.67 – 1.63 (m, 1H), 1.57 – 1.52 (m, 1H), 1.46 – 1.41 (m, 2H), 1.38 – 1.27 (m,

2H), 1.21 – 1.14 (m, 2H), 1.10 (t,  $J = 7.1$  Hz, 3H), 1.04 – 0.95 (m, 1H).  $^{13}\text{C}$  NMR (100 MHz,  $\text{CDCl}_3$ )  $\delta = 170.1, 154.4, 153.1, 151.5, 147.4, 141.5, 137.2, 135.3, 133.7, 132.0, 131.2, 130.6, 129.8, 129.1, 128.2, 126.5, 125.4, 115.5, 109.5, 98.9, 85.8, 59.2, 53.9, 47.7, 35.4, 33.9, 29.8, 25.5, 24.7, 22.7, 14.5$ . HR-MS (ESI)  $m/z$  calcd for  $\text{C}_{33}\text{H}_{36}\text{IN}_6\text{O}_2$   $[\text{M}+\text{H}]^+$  675.1939, found 675.1943.

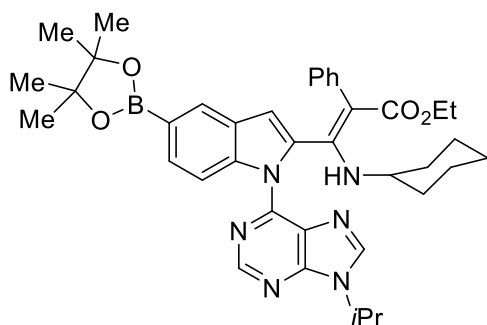

**Ethyl (Z)-3-(cyclohexylamino)-3-[1-(9-isopropyl-9H-purin-6-yl)-5-(4,4,5,5-tetramethyl-1,3,2-dioxaborolan-2-yl)-1H-indol-2-yl]-2-phenylacrylate (3ka)** : The general procedure **B** was followed using substrate **1k** (0.25 mmol, 101 mg), **2a** (0.30 mmol, 82 mg),  $\text{MnBr}(\text{CO})_5$  (6.8 mg, 10 mol %), NaOAc (4.2 mg, 20 mol %), 1 mL 1,4-dioxane. Isolation by column chromatography (PE/EtOAc: 5/1→3/1) yielded **3ka** (163 mg, 97%) as a yellow solid. Also, the general procedure **C** was followed to give **3ka** (149 mg, 88%).  $^1\text{H}$  NMR (400 MHz,  $\text{CDCl}_3$ )  $\delta = 9.35$  (d,  $J = 9.8$  Hz, 1H), 8.81 (s, 1H), 8.08 (s, 1H), 8.03 (s, 1H), 7.64 (d,  $J = 9.5$  Hz, 1H), 7.56 (d,  $J = 8.3$  Hz, 1H), 6.79 – 6.75 (m, 1H), 6.68 – 6.66 (m, 5H), 5.04 – 4.98 (m, 1H), 4.08 – 4.04 (m, 2H), 3.26 – 3.11 (m, 1H), 1.87 – 1.82 (m, 1H), 1.73 (d,  $J = 6.8$  Hz, 3H), 1.69 (d,  $J = 6.8$  Hz, 3H), 1.66 – 1.63 (m, 1H), 1.59 – 1.49 (m, 2H), 1.45 – 1.41 (m, 2H), 1.37 (s, 1H), 1.34 (s, 12H), 1.13 – 1.09 (m, 6H).  $^{13}\text{C}$  NMR (100 MHz,  $\text{CDCl}_3$ )  $\delta = 170.2, 155.0, 153.1, 151.5, 147.9, 141.3, 138.2, 137.3, 133.0, 131.2, 129.7, 128.8, 128.0, 126.5, 125.3, 122.0, 121.1, 112.8, 111.2, 98.8, 83.7, 59.2, 53.8, 47.6, 35.4, 34.0, 29.8, 25.6, 25.0, 24.7, 22.8, 14.5$ . HR-MS (ESI)  $m/z$  calcd for  $\text{C}_{39}\text{H}_{48}\text{BN}_6\text{O}_4$   $[\text{M}+\text{H}]^+$  675.3825, found 675.3819.

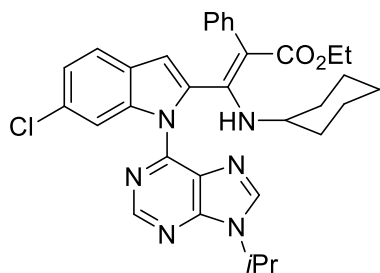

**Ethyl (Z)-3-[6-chloro-1-(9-isopropyl-9H-purin-6-yl)-1H-indol-2-yl]-3-(cyclohexylamino)-2-phenylacrylate (3la):** The general procedure **B** was followed using substrate **1l** (0.25 mmol, 78 mg), **2a** (0.30 mmol, 82 mg). Isolation by column chromatography (PE/EtOAc: 5/1→3/1) yielded **3la** (138 mg, 95%) as a yellow solid.  $^1\text{H}$  NMR (400 MHz,  $\text{CDCl}_3$ )  $\delta$  = 9.35 (d,  $J$  = 9.2 Hz, 1H), 8.82 (s, 1H), 8.07 (s, 1H), 7.57 (s, 1H), 7.45 (d,  $J$  = 8.4 Hz, 1H), 7.12 (dd,  $J$  = 8.4, 1.8 Hz, 1H), 6.83 – 6.79 (m, 1H), 6.74 – 6.69 (m, 4H), 6.60 (s, 1H), 5.01 (h,  $J$  = 6.8 Hz, 1H), 4.10 – 4.02 (m, 2H), 3.19 – 3.08 (m, 1H), 1.88 – 1.82 (m, 1H), 1.74 (d,  $J$  = 6.8 Hz, 3H), 1.71 (d,  $J$  = 6.8 Hz, 3H), 1.68 – 1.58 (m, 2H), 1.57 – 1.51 (m, 1H), 1.44 – 1.38 (m, 2H), 1.34 – 1.30 (m, 1H), 1.22 – 1.14 (m, 2H), 1.11 (t,  $J$  = 6.8 Hz, 3H), 1.07 – 0.99 (m, 1H).  $^{13}\text{C}$  NMR (100 MHz,  $\text{CDCl}_3$ )  $\delta$  = 170.2, 154.5, 153.1, 151.6, 147.5, 141.7, 137.3, 136.6, 133.7, 131.3, 129.6, 126.8, 126.6, 126.6, 125.4, 122.8, 121.9, 113.6, 110.4, 99.0, 59.2, 53.9, 47.7, 35.4, 34.0, 25.5, 24.7, 24.6, 22.8, 14.5. HR-MS (ESI)  $m/z$  calcd for  $\text{C}_{33}\text{H}_{36}\text{ClN}_6\text{O}_2$   $[\text{M}+\text{H}]^+$  583.2583, found 583.2580.

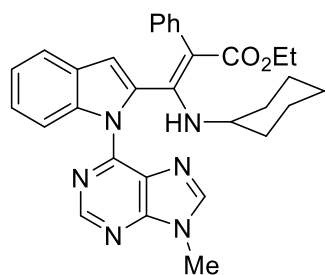

**Ethyl (Z)-3-(cyclohexylamino)-3-[1-(9-methyl-9H-purin-6-yl)-1H-indol-2-yl]-2-phenylacrylate (3ma):** The general procedure **B** was followed using substrate **1m** (0.25 mmol, 63 mg), **2a** (0.30 mmol, 82 mg). Isolation by column chromatography (PE/EtOAc: 3/1→1/2) yielded **3ma** (118 mg, 91%) as a yellow solid. Also, the general procedure **C** was followed to give **3ma** (128 mg, 99%).  $^1\text{H}$  NMR (400 MHz,

CDCl<sub>3</sub>)  $\delta$  = 9.44 (d,  $J$  = 9.6 Hz, 1H), 8.82 (s, 1H), 7.96 (s, 1H), 7.61 – 7.55 (m, 2H), 7.21 – 7.14 (m, 2H), 6.80 – 6.76 (m, 1H), 6.71 – 6.63 (m, 5H), 4.05 (q,  $J$  = 7.1 Hz, 2H), 3.92 (s, 3H), 3.35 – 3.25 (m, 1H), 1.95 – 1.88 (m, 1H), 1.69 – 1.58 (m, 3H), 1.48 – 1.33 (m, 3H), 1.20 – 1.14 (m, 2H), 1.13 – 1.07 (m, 4H). <sup>13</sup>C NMR (100 MHz, CDCl<sub>3</sub>)  $\delta$  = 170.2, 155.2, 153.7, 151.8, 148.0, 144.1, 137.2, 136.3, 132.9, 131.2, 128.3, 126.4, 126.0, 125.2, 123.8, 122.0, 121.1, 113.4, 111.0, 98.6, 59.1, 53.8, 35.4, 34.0, 30.1, 25.6, 24.7, 24.6, 14.5. HR-MS (ESI)  $m/z$  calcd for C<sub>31</sub>H<sub>33</sub>N<sub>6</sub>O<sub>2</sub> [M+H]<sup>+</sup> 521.2660, found 521.2652.

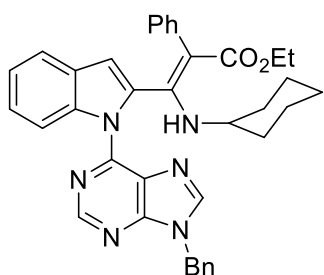

**Ethyl (Z)-3-[1-(9-benzyl-9H-purin-6-yl)-1H-indol-2-yl]-3-(cyclohexylamino)-2-phenylacrylate (3na):** The general procedure **B** was followed using substrate **1n** (0.25 mmol, 81 mg), **2a** (0.30 mmol, 82 mg). Isolation by column chromatography (PE/EtOAc: 5/1→3/1) yielded **3na** (98 mg, 66%) as a yellow solid. Also, the general procedure **C** was followed to give **3na** (98 mg, 66%). <sup>1</sup>H NMR (400 MHz, CDCl<sub>3</sub>)  $\delta$  = 9.43 (d,  $J$  = 9.7 Hz, 1H), 8.85 (s, 1H), 7.98 (s, 1H), 7.62 (d,  $J$  = 7.8 Hz, 1H), 7.57 (d,  $J$  = 6.8 Hz, 1H), 7.42 – 7.37 (m, 5H), 7.20 – 7.16 (m, 2H), 6.78 – 6.74 (m, 1H), 6.69 (s, 1H), 6.66 – 6.59 (m, 4H), 5.51 (s, 2H), 4.07 (q,  $J$  = 7.0 Hz, 2H), 3.32 – 3.22 (m, 1H), 1.93 – 1.87 (m, 1H), 1.68 – 1.53 (m, 3H), 1.44 – 1.35 (m, 3H), 1.20 – 1.14 (m, 2H), 1.12 (d,  $J$  = 7.1 Hz, 3H), 1.04 – 0.94 (m, 1H). <sup>13</sup>C NMR (100 MHz, CDCl<sub>3</sub>)  $\delta$  = 170.2, 155.2, 153.5, 152.0, 148.1, 143.3, 137.3, 136.3, 135.5, 132.9, 131.2, 129.3, 128.8, 128.4, 127.9, 126.5, 126.1, 125.2, 123.8, 122.0, 121.2, 113.4, 111.0, 98.6, 59.1, 53.8, 47.6, 35.4, 34.0, 29.8, 25.6, 24.7, 14.5. HR-MS (ESI)  $m/z$  calcd for C<sub>37</sub>H<sub>37</sub>N<sub>6</sub>O<sub>2</sub> [M+H]<sup>+</sup> 597.2973, found 597.2963.

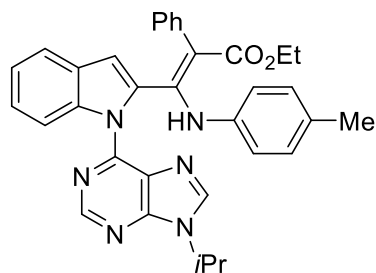

**Ethyl (Z)-3-[1-(9-isopropyl-9H-purin-6-yl)-1H-indol-2-yl]-2-phenyl-3-(*p*-tolylamino)acrylate (**3ab**):** The general procedure **B** was followed using substrate **1a** (0.25 mmol, 70 mg), **2b** (0.30 mmol, 84 mg). Isolation by column chromatography (PE/EtOAc: 3/1→2/1) yielded **3ab** (74 mg, 53%) as a yellow solid. Also, the general procedure **C** was followed using substrate **1a** (0.25 mmol, 70 mg), **2b** (0.30 mmol, 84 mg),  $\text{Re}_2(\text{CO})_{10}$  (8.2 mg, 5.0 mol %) and NaOAc (4.2 mg, 20 mol %) to give **3ab** (46 mg, 33%).  $^1\text{H}$  NMR (400 MHz,  $\text{CDCl}_3$ )  $\delta$  = 11.12 (s, 1H), 8.83 (s, 1H), 7.92 (s, 1H), 7.60 (d,  $J$  = 8.3 Hz, 1H), 7.42 (d,  $J$  = 7.7 Hz, 1H), 7.20 – 7.16 (m, 1H), 7.13 – 7.09 (m, 1H), 6.96 (d,  $J$  = 7.6 Hz, 2H), 6.88 – 6.79 (m, 3H), 6.63 (d,  $J$  = 8.3 Hz, 2H), 6.51 (d,  $J$  = 6.6 Hz, 3H), 5.03 – 4.92 (m, 1H), 4.21 – 4.11 (m, 2H), 2.07 (s, 3H), 1.70 (d,  $J$  = 6.8 Hz, 6H), 1.20 (t,  $J$  = 7.1 Hz, 3H).  $^{13}\text{C}$  NMR (100 MHz,  $\text{CDCl}_3$ )  $\delta$  = 170.3, 152.8, 151.3, 150.6, 147.8, 140.5, 137.7, 137.1, 136.1, 132.2, 131.6, 130.1, 129.0, 128.3, 126.7, 126.1, 125.6, 124.0, 121.9, 121.3, 121.2, 113.6, 113.2, 102.0, 59.8, 47.4, 22.7, 20.7, 14.5. HR-MS (ESI)  $m/z$  calcd for  $\text{C}_{34}\text{H}_{33}\text{N}_6\text{O}_2$   $[\text{M}+\text{H}]^+$  557.2660, found 557.2650.

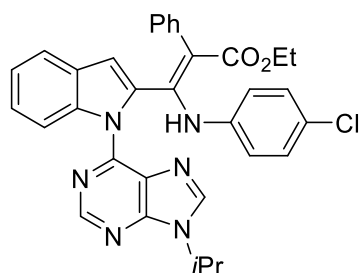

**Ethyl (Z)-3-[(4-chlorophenyl)amino]-3-[1-(9-isopropyl-9H-purin-6-yl)-1H-indol-2-yl]-2-phenylacrylate (**3ac**):** The general procedure **B** was followed using substrate **1a** (0.25 mmol, 70 mg), **2c** (0.30 mmol, 90 mg),  $\text{MnBr}(\text{CO})_5$  (6.8 mg, 10 mol %), NaOAc (4.2 mg, 20 mol %). Isolation by column chromatography (PE/EtOAc:

3/1→2/1) yielded **3ac** (68 mg, 47%) as a yellow solid. Also, the general procedure **C** was followed using substrate **1a** (0.25 mmol, 70 mg), **2c** (0.30 mmol, 90 mg),  $\text{Re}_2(\text{CO})_{10}$  (8.2 mg, 5.0 mol %) and NaOAc (4.2 mg, 20 mol %) to give **3ac** (46 mg, 32%).  $^1\text{H}$  NMR (400 MHz,  $\text{CDCl}_3$ )  $\delta$  = 11.07 (s, 1H), 8.81 (s, 1H), 7.95 (s, 1H), 7.55 (d,  $J$  = 8.3 Hz, 1H), 7.41 (d,  $J$  = 7.7 Hz, 1H), 7.18 (t,  $J$  = 7.6 Hz, 1H), 7.11 (t,  $J$  = 7.4 Hz, 1H), 7.02 – 6.97 (m, 2H), 6.90 – 6.82 (m, 3H), 6.76 – 6.70 (m, 2H), 6.47 – 6.42 (m, 3H), 4.95 (hept,  $J$  = 6.6 Hz, 1H), 4.20 – 4.08 (m, 2H), 1.69 (d,  $J$  = 6.8 Hz, 6H), 1.19 (t,  $J$  = 7.1 Hz, 3H).  $^{13}\text{C}$  NMR (100 MHz,  $\text{CDCl}_3$ )  $\delta$  = 170.4, 152.8, 151.3, 149.8, 147.7, 140.8, 138.8, 136.9, 136.1, 131.6, 131.6, 128.5, 128.2, 127.9, 126.8, 126.1, 125.8, 124.2, 122.2, 122.1, 121.3, 113.6, 113.5, 103.4, 60.0, 47.5, 22.7, 14.4. HR-MS (ESI)  $m/z$  calcd for  $\text{C}_{33}\text{H}_{30}\text{ClN}_6\text{O}_2$   $[\text{M}+\text{H}]^+$  577.2113, found 577.2116.

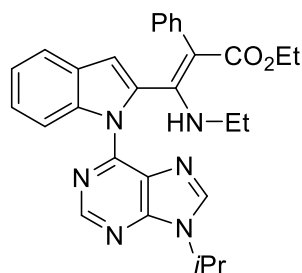

**Ethyl (Z)-3-(ethylamino)-3-[1-(9-isopropyl-9H-purin-6-yl)-1H-indol-2-yl]-2-phenylacrylate (3ad):** The general procedure **B** was followed using substrate **1a** (0.25 mmol, 70 mg), **2d** (0.30 mmol, 66 mg). Isolation by column chromatography (PE/EtOAc: 5/1→3/1) yielded **3ad** (86 mg, 69%) as a yellow solid. Also, the general procedure **C** was followed using substrate **1a** (0.25 mmol, 70 mg), **2d** (0.30 mmol, 66 mg),  $\text{Re}_2(\text{CO})_{10}$  (8.2 mg, 5.0 mol %) and NaOAc (4.2 mg, 20 mol %) to give **3ad** (32 mg, 26%).  $^1\text{H}$  NMR (400 MHz,  $\text{CDCl}_3$ )  $\delta$  = 9.35 (t,  $J$  = 5.5 Hz, 1H), 8.78 (s, 1H), 8.03 (s, 1H), 7.66 – 7.61 (m, 1H), 7.60 – 7.55 (m, 1H), 7.21 – 7.14 (m, 2H), 6.80 – 6.75 (m, 2H), 6.66 – 6.62 (m, 2H), 6.49 (d,  $J$  = 7.2 Hz, 2H), 5.01 (hept,  $J$  = 6.8 Hz, 1H), 4.05 (q,  $J$  = 7.2 Hz, 2H), 3.36 – 3.28 (m, 2H), 1.73 (d,  $J$  = 2.4 Hz, 3H), 1.71 (d,  $J$  = 2.4 Hz, 3H), 1.20 (t,  $J$  = 7.2 Hz, 3H), 1.09 (t,  $J$  = 7.1 Hz, 3H).  $^{13}\text{C}$  NMR (100 MHz,  $\text{CDCl}_3$ )  $\delta$  = 170.2, 155.3, 153.0, 151.4, 147.9, 141.1, 137.1, 136.2, 132.9, 131.1, 128.3, 126.5,

126.4, 125.3, 123.8, 122.1, 121.1, 113.5, 110.8, 98.7, 59.2, 47.5, 25.1, 23.8, 22.7, 14.5.

HR-MS (ESI)  $m/z$  calcd for  $C_{29}H_{31}N_6O_2$   $[M+H]^+$  495.2503, found 495.2494.

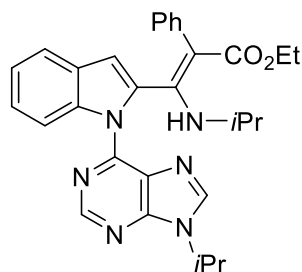

**(Z)-3-(Ethylperoxy)-N-isopropyl-1-[1-(9-isopropyl-9H-purin-6-yl)-1H-indol-2-yl]-2-phenyl-3l2-prop-1-en-1-amine (3ae):** The general procedure **B** was followed using substrate **1a** (0.25 mmol, 70 mg), **2e** (0.30 mmol, 70 mg). Isolation by column chromatography (PE/EtOAc: 5/1→3/1) yielded **3ae** (116 mg, 91%) as a yellow solid. Also, the general procedure **C** was followed using substrate **1a** (0.25 mmol, 70 mg), **2e** (0.30 mmol, 70 mg),  $Re_2(CO)_{10}$  (8.2 mg, 5.0 mol %) and NaOAc (4.2 mg, 20 mol %) to give **3ae** (57 mg, 45%).  $^1H$  NMR (400 MHz,  $CDCl_3$ )  $\delta$  = 9.27 (d,  $J$  = 9.7 Hz, 1H), 8.80 (s, 1H), 8.03 (s, 1H), 7.62 – 7.54 (m, 2H), 7.22 – 7.14 (m, 2H), 6.79 – 6.75 (m, 1H), 6.73 (d,  $J$  = 0.7 Hz, 1H), 6.66 – 6.62 (m, 2H), 6.61 – 6.56 (m, 2H), 5.01 (hept,  $J$  = 6.8 Hz, 1H), 4.05 (q,  $J$  = 7.1 Hz, 2H), 3.71 – 3.58 (m, 1H), 1.73 (d,  $J$  = 6.8 Hz, 3H), 1.71 (d,  $J$  = 6.8 Hz, 3H), 1.21 (d,  $J$  = 6.4 Hz, 3H), 1.12 – 1.07 (m, 6H).  $^{13}C$  NMR (100 MHz,  $CDCl_3$ )  $\delta$  = 170.2, 155.3, 153.0, 151.4, 147.9, 141.1, 137.1, 136.3, 132.9, 131.1, 128.3, 126.5, 126.5, 125.3, 123.8, 122.1, 121.1, 113.5, 110.8, 98.7, 59.2, 47.6, 47.4, 25.1, 23.8, 22.7, 14.5. HR-MS (ESI)  $m/z$  calcd for  $C_{30}H_{33}N_6O_2$   $[M+H]^+$  509.2660, found 509.2653.

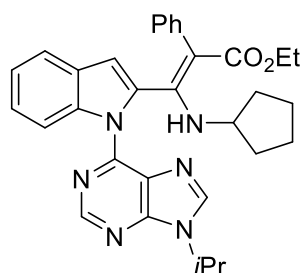

**Ethyl (Z)-3-(cyclopentylamino)-3-[1-(9-isopropyl-9H-purin-6-yl)-1H-indol-2-yl]-2-phenyl-3l2-prop-1-en-1-amine**



**-phenylacrylate (3af):** The general procedure **B** was followed using substrate **1a** (0.25 mmol, 70 mg), **2f** (0.30 mmol, 78 mg). Isolation by column chromatography (PE/EtOAc: 5/1→3/1) yielded **3af** (126 mg, 95%) as a yellow solid. Also, the general procedure **C** was followed using substrate **1a** (0.25 mmol, 70 mg), **2f** (0.30 mmol, 78 mg),  $\text{Re}_2(\text{CO})_{10}$  (8.2 mg, 5.0 mol %) and NaOAc (4.2 mg, 20 mol %) to give **3af** (53 mg, 40%).  $^1\text{H}$  NMR (400 MHz,  $\text{CDCl}_3$ )  $\delta$  = 9.52 (d,  $J$  = 9.4 Hz, 1H), 8.78 (s, 1H), 8.02 (s, 1H), 7.66 – 7.61 (m, 1H), 7.61 – 7.56 (m, 1H), 7.21 – 7.16 (m, 2H), 6.79 – 6.74 (m, 2H), 6.66 – 6.62 (m, 2H), 6.52 (d,  $J$  = 7.3 Hz, 2H), 5.01 (hept,  $J$  = 6.8 Hz, 1H), 4.07 – 4.00 (m, 2H), 3.91 – 3.83 (m, 1H), 1.92 – 1.85 (m, 1H), 1.73 – 1.70 (m, 6H), 1.64 – 1.59 (m, 2H), 1.43 (s, 2H), 1.37 (s, 1H), 1.34 (s, 1H), 1.29 (s, 2H), 1.09 (t,  $J$  = 7.1 Hz, 3H).  $^{13}\text{C}$  NMR (100 MHz,  $\text{CDCl}_3$ )  $\delta$  = 170.2, 155.7, 153.0, 151.4, 148.0, 141.1, 137.1, 136.2, 133.0, 131.1, 128.3, 126.5, 126.4, 125.2, 123.8, 122.0, 121.0, 113.5, 111.0, 98.2, 59.1, 57.4, 47.6, 35.1, 34.1, 29.8, 23.8, 22.7, 14.5. HR-MS (ESI)  $m/z$  calcd for  $\text{C}_{32}\text{H}_{35}\text{N}_6\text{O}_2$   $[\text{M}+\text{H}]^+$  535.2806, found 535.2809.

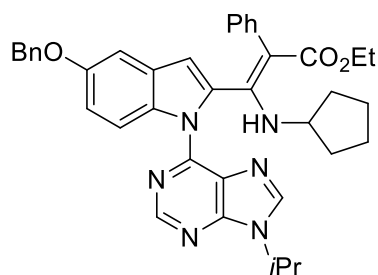

**Ethyl (Z)-3-[5-(benzyloxy)-1-(9-isopropyl-9H-purin-6-yl)-1H-indol-2-yl]-3-(cyclopentylamino)-2-phenylacrylate (3ef):** The general procedure **B** was followed using substrate **1e** (0.25 mmol, 96 mg), **2f** (0.30 mmol, 78 mg). Isolation by column chromatography (PE/EtOAc: 5/1→3/1) yielded **3ef** (146 mg, 91%) as a yellow solid.  $^1\text{H}$  NMR (400 MHz,  $\text{CDCl}_3$ )  $\delta$  = 9.53 (d,  $J$  = 9.4 Hz, 1H), 8.76 (s, 1H), 8.01 (s, 1H), 7.57 (d,  $J$  = 9.1 Hz, 1H), 7.46 (d,  $J$  = 7.1 Hz, 2H), 7.42 – 7.37 (m, 2H), 7.35 – 7.30 (m, 1H), 7.10 (d,  $J$  = 2.5 Hz, 1H), 6.92 (dd,  $J$  = 9.1, 2.5 Hz, 1H), 6.77 (t,  $J$  = 7.3 Hz, 1H), 6.68 (s, 1H), 6.64 (t,  $J$  = 7.5 Hz, 2H), 6.50 (d,  $J$  = 7.2 Hz, 2H), 5.10 (s, 2H), 5.00 (hept,  $J$  = 6.8 Hz, 1H), 4.07 – 3.98 (m, 2H), 3.93 – 3.83 (m, 1H), 1.94 – 1.87 (m, 1H), 1.72 (d,  $J$  = 6.5 Hz, 3H), 1.70 (d,  $J$  = 6.5 Hz, 3H), 1.69 – 1.55 (m, 4H), 1.53 – 1.43 (m, 3H),

1.09 (t,  $J = 7.1$  Hz, 3H).  $^{13}\text{C}$  NMR (100 MHz,  $\text{CDCl}_3$ )  $\delta = 170.2, 155.8, 154.8, 152.9, 151.4, 147.9, 140.9, 137.6, 137.1, 133.5, 131.4, 131.0, 129.0, 128.7, 128.0, 127.6, 126.4, 126.2, 125.2, 114.5, 114.3, 110.9, 104.1, 98.0, 70.7, 60.6, 59.1, 57.4, 47.5, 35.1, 34.1, 23.9, 22.8, 14.5$ . HR-MS (ESI)  $m/z$  calcd for  $\text{C}_{39}\text{H}_{41}\text{N}_6\text{O}_3$   $[\text{M}+\text{H}]^+$  641.3235, found 641.3233.

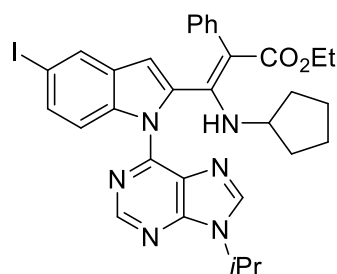

**Ethyl (Z)-3-(cyclopentylamino)-3-[5-iodo-1-(9-isopropyl-9H-purin-6-yl)-1H-indol-2-yl]-2-phenylacrylate (3jf):** The general procedure **B** was followed using substrate **1j** (0.25 mmol, 101 mg), **2f** (0.30 mmol, 78 mg). Isolation by column chromatography (PE/EtOAc: 5/1→3/1) yielded **3jf** (159 mg, 96%) as a yellow solid.  $^1\text{H}$  NMR (400 MHz,  $\text{CDCl}_3$ )  $\delta = 9.47$  (d,  $J = 9.4$  Hz, 1H), 8.79 (s, 1H), 8.02 (s, 1H), 7.92 (d,  $J = 1.4$  Hz, 1H), 7.42 (td,  $J = 8.6, 1.4$  Hz, 1H), 7.39 (t,  $J = 8.6$  Hz, 1H), 6.80 – 6.75 (m, 1H), 6.67 – 6.62 (m, 3H), 6.51 (d,  $J = 7.3$  Hz, 2H), 5.00 (hept,  $J = 6.7$  Hz, 1H), 4.06 – 4.01 (m, 2H), 3.82 – 3.73 (m, 1H), 1.88 – 1.83 (m, 1H), 1.72 (d,  $J = 6.7$  Hz, 3H), 1.72 (d,  $J = 6.7$  Hz, 3H), 1.68 – 1.56 (m, 4H), 1.50 – 1.40 (m, 3H), 1.08 (t,  $J = 7.1$  Hz, 3H).  $^{13}\text{C}$  NMR (100 MHz,  $\text{CDCl}_3$ )  $\delta = 170.1, 154.9, 153.1, 151.5, 147.5, 141.1, 136.9, 135.3, 133.8, 132.1, 131.0, 130.7, 129.8, 126.5, 126.4, 125.4, 115.6, 109.7, 98.5, 85.9, 60.5, 59.2, 57.4, 47.7, 35.0, 34.0, 23.8, 22.8, 22.7, 14.5$ . HR-MS (ESI)  $m/z$  calcd for  $\text{C}_{32}\text{H}_{34}\text{IN}_6\text{O}_2$   $[\text{M}+\text{H}]^+$  661.1782, found 661.1780.

### Gram-scale synthesis

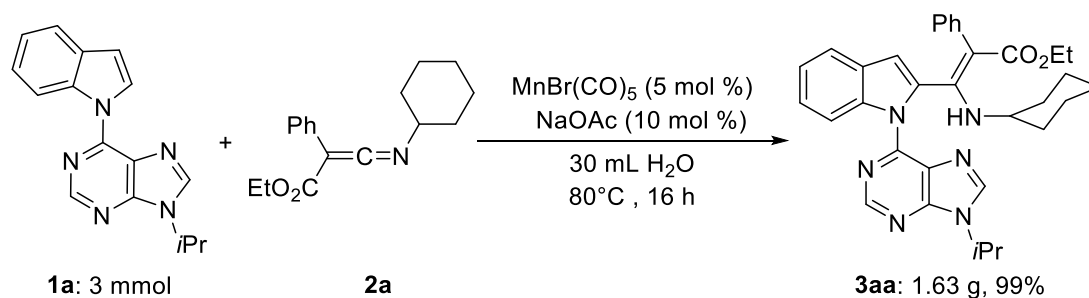

In an oven-dried Schlenk tube equipped with a magnetic stirring bar, a mixture of substrate **1a** (3 mmol, 832 mg), **2a** (3.6 mmol, 977 mg),  $\text{MnBr(CO)}_5$  (0.15 mmol, 41 mg), NaOAc (0.3 mmol, 25 mg), and  $\text{H}_2\text{O}$  (30 mL) were added under  $\text{N}_2$  atmosphere. The reaction mixture was stirred at 80 °C in oil bath for 16 hours. After completion of the reaction, the reaction mixture was poured into  $\text{H}_2\text{O}$  (20 mL) and extracted with EtOAc (4×15 mL). The combined organic phase was dried with  $\text{Na}_2\text{SO}_4$ . After filtration and evaporation of the solvents under reduced pressure, the residue was purified by column chromatography on silica gel afforded the desired product **3aa** (1.63 g, 99%) as a yellow solid. The spectral data was identical to its reported above.

## Mechanistic Studies

### Intermolecular Competition Experiments

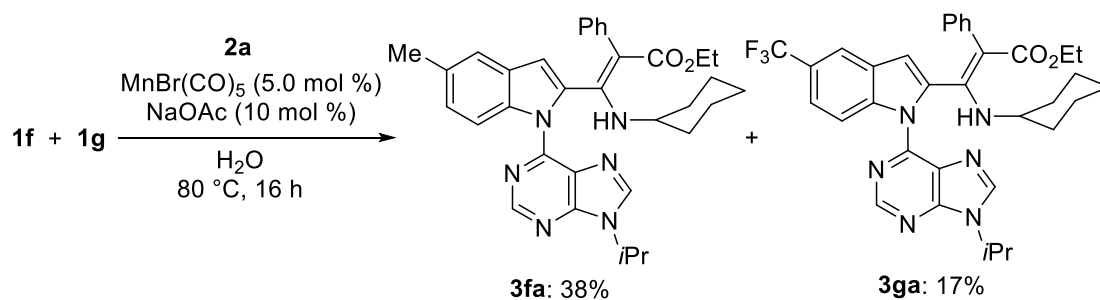

In an oven-dried Schlenk tube equipped with a magnetic stirring bar, a mixture of substrate **1f** (0.25 mmol, 73 mg), **1g** (0.25 mmol, 88 mg), **2a** (0.25 mmol, 68 mg),  $\text{MnBr}(\text{CO})_5$  (5.0 mol %, 3.4 mg),  $\text{NaOAc}$  (10 mol %, 2.1 mg), and  $\text{H}_2\text{O}$  (1 mL) were added under  $\text{N}_2$  atmosphere. The reaction mixture was stirred at 80 °C in oil bath for 16 hours. After completion of the reaction, the reaction mixture was poured into  $\text{H}_2\text{O}$  (10 mL) and extracted with  $\text{EtOAc}$  (4×5 mL). The combined organic phase was dried with  $\text{Na}_2\text{SO}_4$ . After filtration and evaporation of the solvents under reduced pressure, the residue was purified by column chromatography on silica gel afforded **3fa** (54 mg, 38%) as a yellow solid and **3ga** (27 mg, 17%) as a yellow solid.

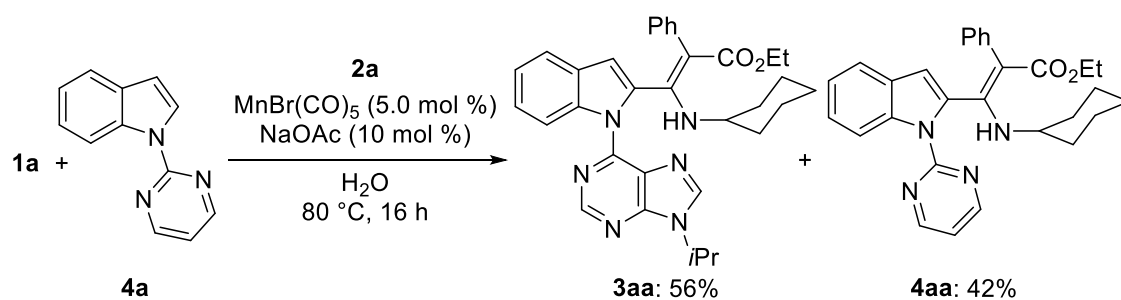

In an oven-dried Schlenk tube equipped with a magnetic stirring bar, a mixture of substrate **1a** (0.25 mmol, 70 mg), **4a** (0.25 mmol, 49 mg), **2a** (0.25 mmol, 68 mg),  $\text{MnBr}(\text{CO})_5$  (5.0 mol %, 3.4 mg),  $\text{NaOAc}$  (10 mol %, 2.1 mg), and  $\text{H}_2\text{O}$  (1 mL) were added under  $\text{N}_2$  atmosphere. The reaction vessel was heated to 80 °C in oil bath for 16 hours. After completion of the reaction, the reaction mixture was poured into  $\text{H}_2\text{O}$  (10

mL) and extracted with EtOAc (4×5 mL). The combined organic phase was dried with Na<sub>2</sub>SO<sub>4</sub>. After filtration and evaporation of the solvents under reduced pressure, the residue was purified by column chromatography on silica gel afforded **3aa** (77 mg, 56%) as a yellow solid and **4aa** (49 mg, 42%) as a white solid.

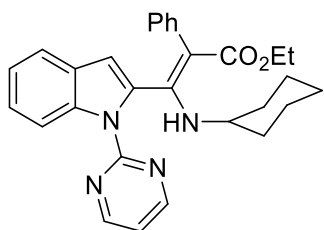

**Ethyl (Z)-3-(cyclohexylamino)-2-phenyl-3-[1-(pyrimidin-2-yl)-1H-indol-2-yl]acrylate (**4aa**):** <sup>1</sup>H NMR (400 MHz, CDCl<sub>3</sub>)  $\delta$  = 9.57 (d, *J* = 11.1 Hz, 1H), 8.66 (d, *J* = 4.5 Hz, 2H), 8.21 (d, *J* = 8.5 Hz, 1H), 7.52 (d, *J* = 7.5 Hz, 1H), 7.24 – 7.14 (m, 2H), 7.08 (t, *J* = 4.0 Hz, 1H), 6.87 – 6.74 (m, 3H), 6.61 (d, *J* = 8.8 Hz, 3H), 4.14 – 4.04 (m, 2H), 3.35 – 3.11 (m, 1H), 1.94 – 1.84 (m, 1H), 1.80 – 1.72 (m, 1H), 1.71 – 1.59 (m, 2H), 1.46 – 1.10 (m, 9H). HR-MS (ESI) *m/z* calcd for C<sub>29</sub>H<sub>31</sub>N<sub>4</sub>O<sub>2</sub> [M+H]<sup>+</sup> 467.2442, found 467.2440. Analytical data for compound **4aa** was consistent with the literature.<sup>[1]</sup>

### Manganese-Catalyzed H/D Exchange Experiments

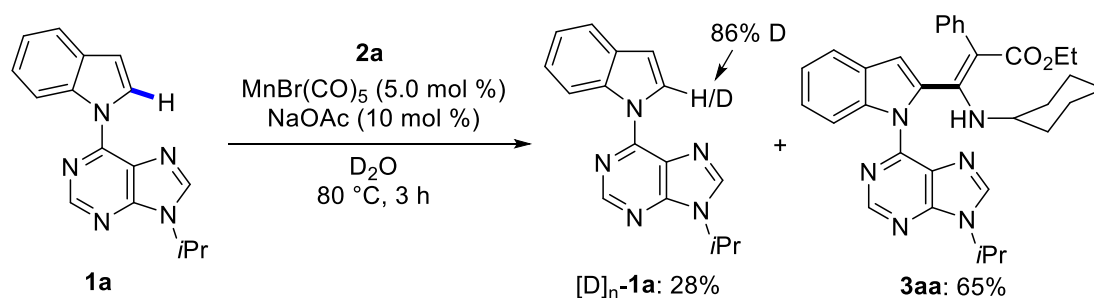

6-(1*H*-Indol-1-yl)-9-isopropyl-9*H*-purine (**1a**) (0.25 mmol, 70 mg), **2a** (0.30 mmol, 82 mg), MnBr(CO)<sub>5</sub> (5.0 mol %, 3.4 mg), NaOAc (10 mol %, 2.1 mg) and D<sub>2</sub>O (1.0 mL) were placed in a 15 mL Schlenk tube under N<sub>2</sub> and were then stirred at 80 °C for 3 h. At ambient temperature, the reaction mixture was diluted with H<sub>2</sub>O (10 mL) and extracted with EtOAc (4×5 mL). The combined organic phase was dried with Na<sub>2</sub>SO<sub>4</sub>.

After filtration and evaporation of the solvents under reduced pressure, the residue was purified by column chromatography on silica gel afforded [D]<sub>n</sub>-**1a** (19 mg, 28%) as white solid and **3aa** (89 mg, 65%) as a yellow solid. The D incorporation was determined by <sup>1</sup>H-NMR spectroscopy.

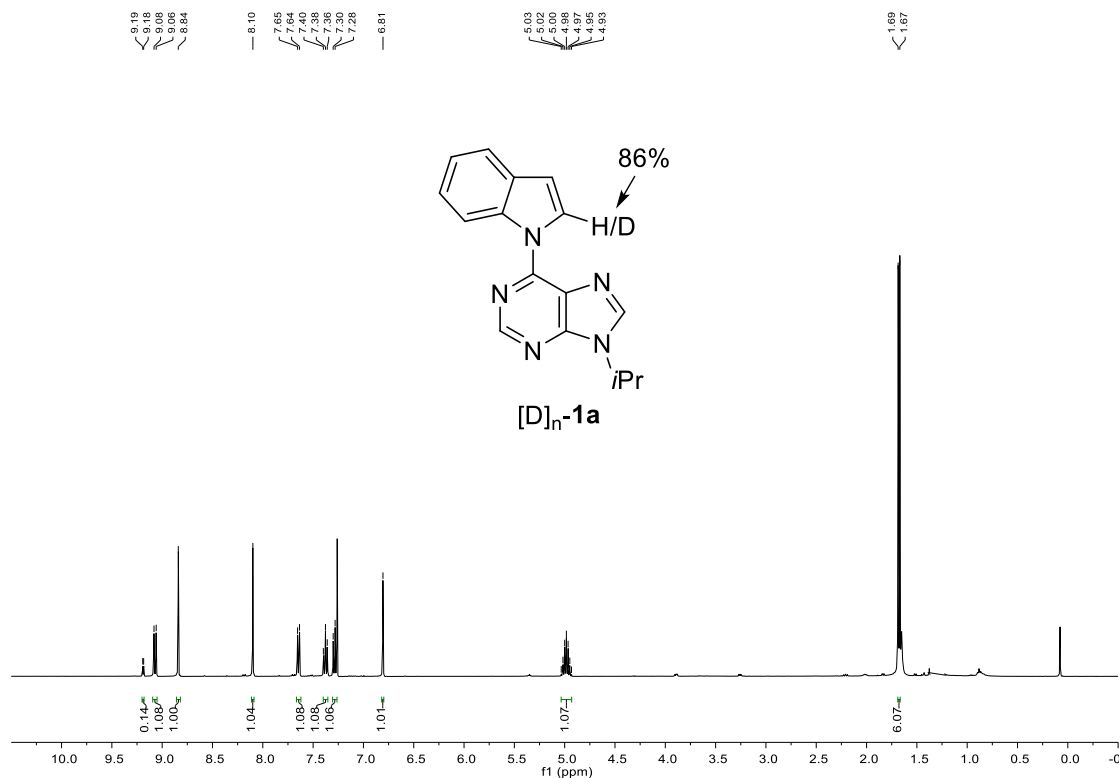

## Reactions in the Presence of Radical Scavengers

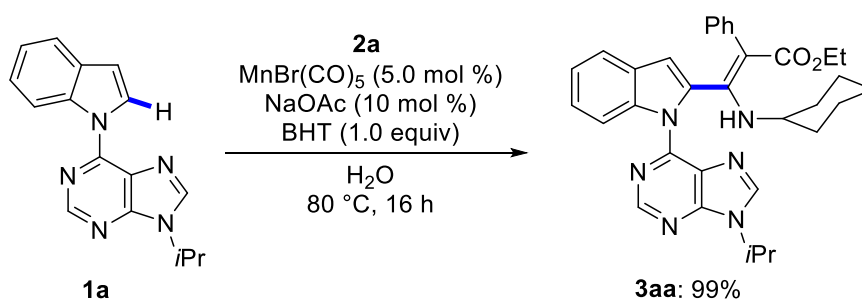

6-(1*H*-Indol-1-yl)-9-isopropyl-9*H*-purine (**1a**) (0.25 mmol, 70 mg), **2a** (0.30 mmol, 82 mg), MnBr(CO)<sub>5</sub> (5 mol %, 3.4 mg), NaOAc (10 mol %, 2.1 mg), BHT (0.25 mmol, 56 mg) and H<sub>2</sub>O (1.0 mL) were placed in a 15 mL Schlenk tube under N<sub>2</sub> and were then stirred at 80 °C for 3 h. At ambient temperature, the reaction mixture was diluted

with H<sub>2</sub>O (10 mL) and extracted with EtOAc (4×5 mL). The combined organic phase was dried with Na<sub>2</sub>SO<sub>4</sub>. After filtration and evaporation of the solvents under reduced pressure, the residue was purified by column chromatography on silica gel afforded **3aa** (136 mg, 99%) as a yellow solid.

### C–H Enaminylation with Cyclometalated Complex **5a**

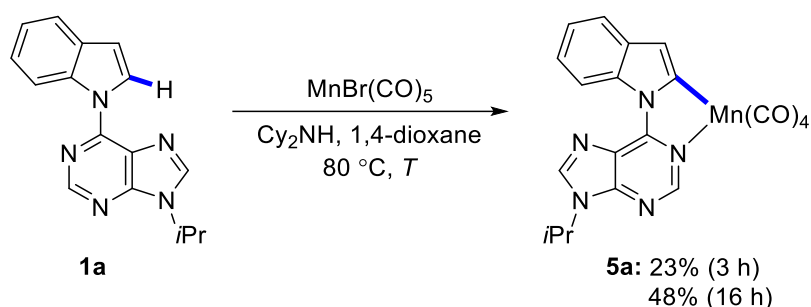

Following a modification of a reported procedure,<sup>[2]</sup> 6-(1*H*-indol-1-yl)-9-isopropyl-9*H*-purine (**1a**) (0.5 mmol, 140 mg), MnBr(CO)<sub>5</sub> (0.5 mmol, 137 mg), Cy<sub>2</sub>NH (1.0 mmol, 182 mg) and 1,4-dioxane (1.0 mL) were placed in a 15 mL Schlenk tube under N<sub>2</sub> and then stirred at 80 °C for 3 h or 16 h. At ambient temperature, the mixture was diluted with EtOAc (20 mL) and filtered through a short pad of celite. The solvent was removed by rotary evaporation and the residue was purified by flash column chromatography on silica gel afforded **5a** (3 h: 20 mg, 23%; 16 h: 107 mg, 48%) as a yellow solid. <sup>1</sup>H NMR (400 MHz, CDCl<sub>3</sub>) δ = 9.98 (d, *J* = 7.9 Hz, 1H), 8.74 (s, 1H), 8.16 (s, 1H), 7.43 (d, *J* = 7.2 Hz, 1H), 7.29 – 7.22 (m, 1H), 7.19 (t, *J* = 7.2 Hz, 1H), 6.92 (s, 1H), 4.93 (hept, *J* = 6.7 Hz, 1H), 1.68 (d, *J* = 6.7 Hz, 6H). <sup>13</sup>C NMR (100 MHz, CDCl<sub>3</sub>) δ = 218.9, 213.5, 210.8, 167.7, 155.5, 153.5, 152.8, 139.7, 139.4, 136.6, 123.6, 121.1, 120.9, 117.3, 116.7, 48.0, 22.6. HR-MS (ESI) *m/z* calcd for C<sub>20</sub>H<sub>15</sub>MnN<sub>5</sub>O<sub>4</sub> [M+H]<sup>+</sup> 444.0499, found 444.0495. The structure of **5a** was confirmed by single-crystal X-ray diffraction analysis.

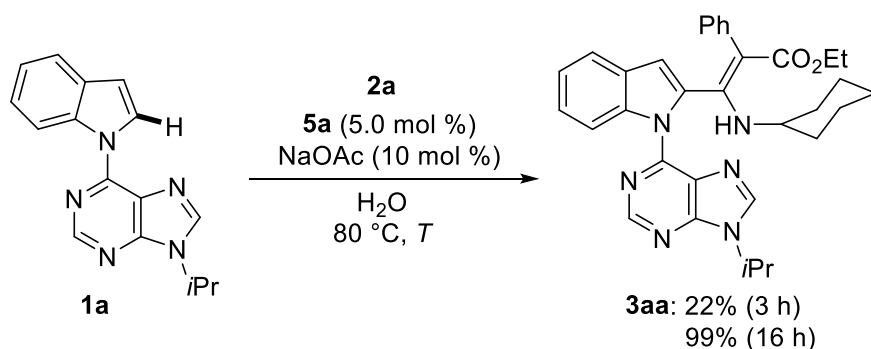

6-(1*H*-Indol-1-yl)-9-isopropyl-9*H*-purine (**1a**) (0.25 mmol, 70 mg), **2a** (0.30 mmol, 82 mg), **5a** (0.0125 mmol, 5.6 mg), NaOAc (0.025 mmol, 2.1 mg) and H<sub>2</sub>O (1.0 mL) were placed in a 15 mL Schlenk tube under N<sub>2</sub> and then stirred at 80 °C for 3 h or 16 h. At ambient temperature, the reaction mixture was diluted with H<sub>2</sub>O (10 mL) and extracted with EtOAc (4×5 mL). The combined organic phase was dried with Na<sub>2</sub>SO<sub>4</sub>. After filtration and evaporation of the solvents under reduced pressure, the residue was purified by column chromatography on silica gel afforded **3aa** (3h: 24 mg, 22%; 16h: 136 mg, 99%).

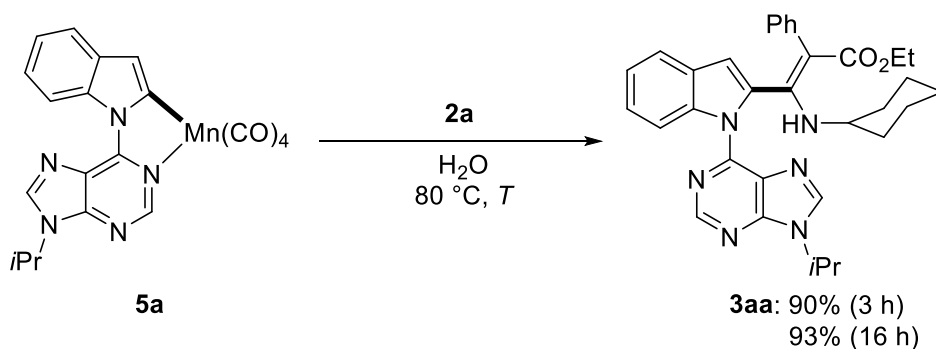

Complex **5a** (0.25 mmol, 111 mg), **2a** (0.30 mmol, 82 mg), and H<sub>2</sub>O (1.0 mL) were placed in a 15 mL Schlenk tube under N<sub>2</sub> and were then stirred at 80 °C for 3 h or 16 h. At ambient temperature, the reaction mixture was diluted with H<sub>2</sub>O (10 mL) and extracted with EtOAc (4×5 mL). The combined organic phase was dried with Na<sub>2</sub>SO<sub>4</sub>. After filtration and evaporation of the solvents under reduced pressure, the residue was purified by column chromatography on silica gel afforded **3aa** (3h: 99 mg, 90%; 16h: 127 mg, 93%).



## Synthetic Procedure and Characterization Data for 6

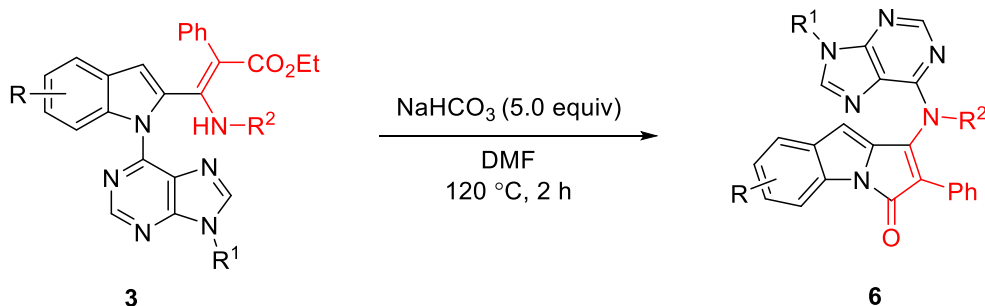

The mixture of **3** (0.1 mmol),  $\text{NaHCO}_3$  (0.5 mmol) in 2 mL of DMF was stirred at 120 °C for 2 hours under  $\text{N}_2$  atmosphere. Then the reaction mixture was poured into  $\text{H}_2\text{O}$  (30 mL) and extracted with EtOAc ( $3 \times 15$  mL). The combined organic phase was dried with  $\text{Na}_2\text{SO}_4$ . After filtration and evaporation of the solvents under reduced pressure, the residue was purified by column chromatography on silica gel afforded **6**.

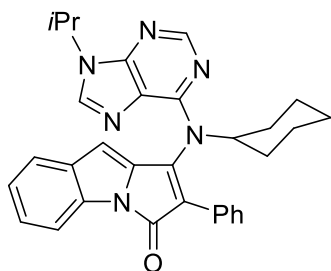

**1-[Cyclohexyl(9-isopropyl-9H-purin-6-yl)amino]-2-phenyl-3H-pyrrolo[1,2-a]indol-1-one (6a):** The mixture of **3aa** (0.1 mmol, 55 mg),  $\text{NaHCO}_3$  (0.5 mmol, 41 mg) and 2 mL DMF was stirred at 120 °C for 2 hours under  $\text{N}_2$  atmosphere. Isolation by column chromatography (PE/EtOAc: 2/1→1/1) yielded **6a** (47 mg, 94%) as a red solid.  $^1\text{H}$  NMR (400 MHz,  $\text{CDCl}_3$ )  $\delta$  = 8.47 (s, 1H), 7.81 – 7.77 (m, 2H), 7.52 – 7.48 (m, 2H), 7.33 (d,  $J$  = 7.7 Hz, 1H), 7.29 (td,  $J$  = 7.7, 1.0 Hz, 1H), 7.24 – 7.21 (m, 3H), 7.08 (td,  $J$  = 7.7, 1.0 Hz, 1H), 6.19 (s, 1H), 5.16 (t,  $J$  = 10.9 Hz, 1H), 4.85 (hept,  $J$  = 6.8 Hz, 1H), 1.90 – 1.81 (m, 2H), 1.75 – 1.70 (m, 2H), 1.65 – 1.61 (m, 3H), 1.58 (d,  $J$  = 6.8 Hz, 6H), 1.45 – 1.36 (m, 2H), 1.10 – 0.99 (m, 1H).  $^{13}\text{C}$  NMR (100 MHz,  $\text{CDCl}_3$ )  $\delta$  = 164.1, 153.9, 151.9, 151.2, 142.4, 140.8, 138.1, 134.6, 134.0, 130.5, 128.8, 128.7, 128.2, 127.3, 123.4, 122.7, 121.6, 112.9, 106.8, 59.0, 46.9, 31.6, 26.1, 25.5, 22.8. HR-MS (ESI)  $m/z$  calcd for  $\text{C}_{31}\text{H}_{31}\text{N}_6\text{O}$   $[\text{M}+\text{H}]^+$  503.2554, found 503.2555.

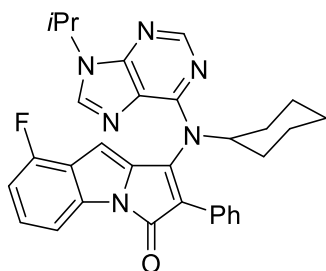

**1-[Cyclohexyl(9-isopropyl-9H-purin-6-yl)amino]-8-fluoro-2-phenyl-3H-pyrrolo[1,2-a]indol-3-one (6b):** The mixture of **3ca** (0.1 mmol, 56 mg), NaHCO<sub>3</sub> (0.5 mmol, 41 mg) and 2 mL DMF was stirred at 120 °C for 2 hours under N<sub>2</sub> atmosphere. Isolation by column chromatography (PE/EtOAc: 2/1→1/1) yielded **6b** (32 mg, 61%) as a red solid. <sup>1</sup>H NMR (400 MHz, CDCl<sub>3</sub>)  $\delta$  = 8.48 (s, 1H), 7.81 (s, 1H), 7.59 (d,  $J$  = 8.0 Hz, 1H), 7.50 – 7.46 (m, 2H), 7.25 – 7.21 (m, 4H), 6.82 – 6.76 (m, 1H), 6.30 (s, 1H), 5.25 – 5.05 (m, 1H), 4.84 (hept,  $J$  = 6.8 Hz, 1H), 1.90 – 1.82 (m, 2H), 1.78 – 1.70 (m, 2H), 1.64 – 1.61 (m, 1H), 1.58 (d,  $J$  = 6.8 Hz, 6H), 1.45 – 1.37 (m, 2H), 1.11 – 1.00 (m, 1H), 0.90 – 0.83 (m, 2H). <sup>13</sup>C NMR (100 MHz, CDCl<sub>3</sub>)  $\delta$  = 164.1, 156.6 (d,  $^1J_{C-F}$  = 253.8 Hz), 153.7, 151.8, 151.1, 142.5, 140.5, 138.2, 136.2 (d,  $^3J_{C-F}$  = 8.2 Hz), 130.3, 128.8, 128.7, 128.5 (d,  $^3J_{C-F}$  = 8.0 Hz), 128.2, 122.2 (d,  $^2J_{C-F}$  = 21.8 Hz), 121.6, 109.4 (d,  $^2J_{C-F}$  = 19.8 Hz), 109.1 (d,  $^4J_{C-F}$  = 3.7 Hz), 102.1, 59.2, 47.0, 31.6, 26.1, 25.5, 22.8. <sup>19</sup>F NMR (376 MHz, CDCl<sub>3</sub>)  $\delta$  = -119.58. HR-MS (ESI)  $m/z$  calcd for C<sub>31</sub>H<sub>30</sub>FN<sub>6</sub>O [M+H]<sup>+</sup> 521.2460, found 521.2457. The structure of **6b** was confirmed by single-crystal X-ray diffraction analysis.

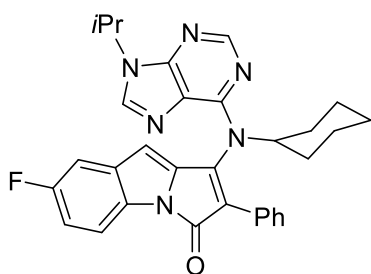

**1-[Cyclohexyl(9-isopropyl-9H-purin-6-yl)amino]-7-fluoro-2-phenyl-3H-pyrrolo[1,2-a]indol-3-one (6c):** The mixture of **3ha** (0.1 mmol, 56 mg), NaHCO<sub>3</sub> (0.5 mmol, 41 mg) and 2 mL DMF was stirred at 120 °C for 2 hours under N<sub>2</sub> atmosphere.

Isolation by column chromatography (PE/EtOAc: 2/1→1/1) yielded **6c** (49 mg, 95%) as a red solid.  $^1\text{H}$  NMR (400 MHz,  $\text{CDCl}_3$ )  $\delta$  = 8.48 (s, 1H), 7.81 (s, 1H), 7.71 (dd,  $J$  = 8.3, 4.4 Hz, 1H), 7.50 – 7.46 (m, 2H), 7.25 – 7.21 (m, 3H), 7.01 (d,  $J$  = 9.0 Hz, 2H), 6.15 (s, 1H), 5.23 – 5.09 (m, 1H), 4.84 (hept,  $J$  = 6.8 Hz, 1H), 1.89 – 1.80 (m, 2H), 1.77 – 1.70 (m, 2H), 1.69 – 1.64 (m, 1H), 1.63 – 1.60 (m, 1H), 1.58 (d,  $J$  = 6.8 Hz, 6H), 1.55 – 1.51 (m, 1H), 1.44 – 1.36 (m, 2H), 1.10 – 0.97 (m, 1H).  $^{13}\text{C}$  NMR (100 MHz,  $\text{CDCl}_3$ )  $\delta$  = 163.8, 160.8, 158.4, 152.4 (d,  $^1J_{\text{C-F}}$  = 269.0 Hz), 151.8, 142.3, 138.2, 134.9 (d,  $^3J_{\text{C-F}}$  = 8.0 Hz), 130.9, 130.3, 129.4, 128.8, 128.8, 128.3, 121.6, 114.3 (d,  $^2J_{\text{C-F}}$  = 24.0 Hz), 113.3 (d,  $^3J_{\text{C-F}}$  = 8.4 Hz), 108.9 (d,  $^1J_{\text{C-F}}$  = 26.0 Hz), 106.1 (d,  $^4J_{\text{C-F}}$  = 3.5 Hz), 59.1, 47.0, 31.6, 26.0, 25.4, 22.8.  $^{19}\text{F}$  NMR (376 MHz,  $\text{CDCl}_3$ )  $\delta$  = -119.78. HR-MS (ESI)  $m/z$  calcd for  $\text{C}_{31}\text{H}_{30}\text{FN}_6\text{O}$   $[\text{M}+\text{H}]^+$  521.2460, found 521.2459.

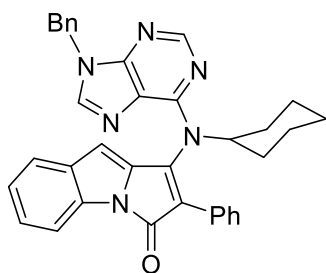

**1-[9-Benzyl-9H-purin-6-yl](cyclohexyl)amino]-2-phenyl-3H-pyrrolo[1,2-a]indol-3-one (6d):** The mixture of **3na** (0.1 mmol, 59 mg),  $\text{NaHCO}_3$  (0.5 mmol, 41 mg) and 2 mL DMF was stirred at 120 °C for 2 hours under  $\text{N}_2$  atmosphere. Isolation by column chromatography (PE/EtOAc: 2/1→1/1) yielded **6d** (51 mg, 93%) as a red solid.  $^1\text{H}$  NMR (400 MHz,  $\text{CDCl}_3$ )  $\delta$  = 8.51 (s, 1H), 7.78 (d,  $J$  = 7.7 Hz, 1H), 7.69 (s, 1H), 7.52 – 7.47 (m, 2H), 7.36 – 7.32 (m, 4H), 7.31 – 7.26 (m, 3H), 7.24 – 7.21 (m, 3H), 7.11 – 7.05 (m, 1H), 6.21 (s, 1H), 5.34 (s, 2H), 5.23 – 5.09 (m, 1H), 1.92 – 1.81 (m, 2H), 1.76 – 1.70 (m, 2H), 1.63 – 1.52 (m, 3H), 1.44 – 1.36 (m, 2H), 1.10 – 0.99 (m, 1H).  $^{13}\text{C}$  NMR (100 MHz,  $\text{CDCl}_3$ )  $\delta$  = 164.0, 153.9, 152.4, 151.6, 142.1, 140.7, 140.3, 135.5, 134.6, 134.0, 130.4, 129.1, 129.1, 128.7, 128.6, 128.5, 128.2, 128.0, 127.2, 123.4, 122.7, 121.0, 112.9, 106.7, 58.9, 47.2, 31.6, 26.0, 25.4. HR-MS (ESI)  $m/z$  calcd for  $\text{C}_{35}\text{H}_{31}\text{N}_6\text{O}$   $[\text{M}+\text{H}]^+$  551.2554, found 551.2556.

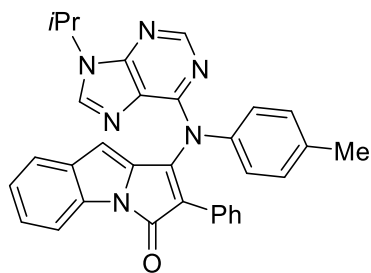

**1-[(9-Isopropyl-9H-purin-6-yl)(*p*-tolyl)amino]-2-phenyl-3H-pyrrolo[1,2-*a*]indol-3-one (6e):** The mixture of **3ab** (0.1 mmol, 55 mg), NaHCO<sub>3</sub> (0.5 mmol, 41 mg) and 2 mL DMF was stirred at 120 °C for 2 hours under N<sub>2</sub> atmosphere. Isolation by column chromatography (PE/EtOAc: 2/1→1/1) yielded **6e** (42 mg, 84%) as a red solid. <sup>1</sup>H NMR (400 MHz, CDCl<sub>3</sub>)  $\delta$  = 8.43 (s, 1H), 7.83 – 7.75 (m, 2H), 7.39 – 7.34 (m, 2H), 7.29 – 7.24 (m, 4H), 7.14 – 7.11 (m, 2H), 7.06 – 7.00 (m, 1H), 6.91 – 6.85 (m, 3H), 5.61 (s, 1H), 4.68 (hept, *J* = 6.7 Hz, 1H), 2.44 (s, 3H), 1.47 (d, *J* = 6.7 Hz, 6H). <sup>13</sup>C NMR (100 MHz, CDCl<sub>3</sub>)  $\delta$  = 164.6, 152.0, 151.9, 151.5, 143.6, 140.3, 139.4, 137.8, 137.6, 134.1, 133.6, 130.3, 130.0, 127.8, 127.4, 127.1, 126.9, 126.4, 124.6, 122.9, 122.6, 121.7, 112.7, 107.5, 47.2, 22.6, 21.4. HR-MS (ESI) *m/z* calcd for C<sub>32</sub>H<sub>27</sub>N<sub>6</sub>O [M+H]<sup>+</sup> 511.2241, found 511.2242.

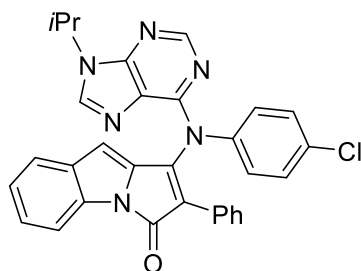

**1-[(4-Chlorophenyl)(9-isopropyl-9H-purin-6-yl)amino]-2-phenyl-3H-pyrrolo[1,2-*a*]indol-3-one (6f):** The mixture of **3ac** (0.1 mmol, 57 mg), NaHCO<sub>3</sub> (0.5 mmol, 41 mg) and 2 mL DMF was stirred at 120 °C for 2 hours under N<sub>2</sub> atmosphere. Isolation by column chromatography (PE/EtOAc: 2/1→1/1) yielded **6f** (33 mg, 61%) as a red solid. <sup>1</sup>H NMR (400 MHz, CDCl<sub>3</sub>)  $\delta$  = 8.44 (s, 1H), 7.83 (s, 1H), 7.78 (d, *J* = 8.3 Hz, 1H), 7.45 – 7.39 (m, 4H), 7.30 – 7.26 (m, 2H), 7.14 – 7.11 (m, 2H), 7.08 – 7.03 (m, 1H), 6.96 – 6.88 (m, 3H), 5.69 (s, 1H), 4.70 (hept, *J* = 6.8 Hz, 1H), 1.49 (d, *J* = 6.8 Hz, 6H). <sup>13</sup>C NMR (100 MHz, CDCl<sub>3</sub>)  $\delta$  = 164.3, 152.1, 151.6, 151.5, 142.9, 140.6, 140.4,

137.5, 134.2, 133.6, 133.0, 129.8, 129.8, 129.7, 127.9, 127.7, 127.5, 127.3, 127.1, 124.6, 123.2, 122.7, 112.8, 107.5, 47.4, 22.6. HR-MS (ESI)  $m/z$  calcd for  $C_{31}H_{24}ClN_6O$   $[M+H]^+$  531.1695, found 531.1670.

## Synthetic Procedure and Characterization Data for **7**

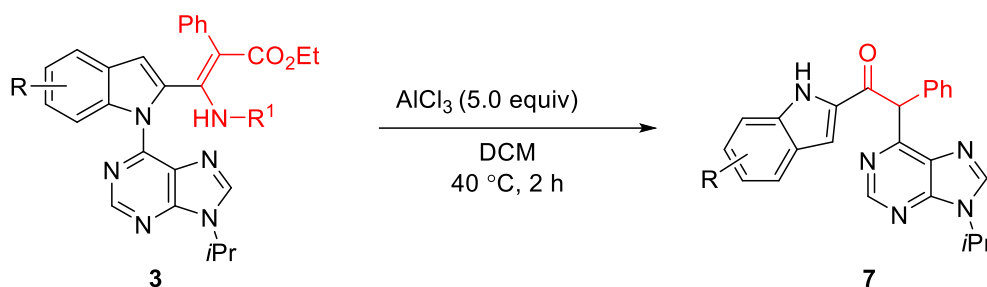

The mixture of **3** (0.1 mmol),  $\text{AlCl}_3$  (0.5 mmol) in 2 mL of DCM was stirred at 120 °C for 2 hours under  $\text{N}_2$  atmosphere. Then the reaction mixture was poured into  $\text{H}_2\text{O}$  (30 mL) and extracted with DCM (3×15 mL). The combined organic phase was dried with  $\text{Na}_2\text{SO}_4$ . After filtration and evaporation of the solvents under reduced pressure, the residue was purified by column chromatography on silica gel afforded **7** (note: containing uncertain impurity, ~95% pure).

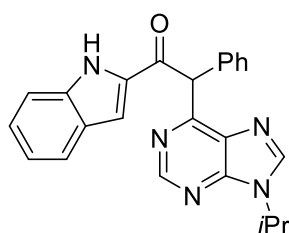

**1-(1H-Indol-2-yl)-2-(9-isopropyl-9H-purin-6-yl)-2-phenylethan-1-one (7a):** The mixture of **3aa** (0.1 mmol, 55 mg),  $\text{AlCl}_3$  (0.5 mmol, 66 mg) and 2 mL DCM was stirred at 120 °C for 2 hours under  $\text{N}_2$  atmosphere. Isolation by column chromatography (PE/EtOAc: 2/1→3/2) yielded **7a** (32 mg, 81%) as yellow solid.  $^1\text{H}$  NMR (400 MHz,  $\text{CDCl}_3$ )  $\delta$  = 9.43 (s, 1H), 8.93 (s, 1H), 8.14 (s, 1H), 7.70 (d,  $J$  = 7.2 Hz, 2H), 7.57 (d,  $J$  = 8.0 Hz, 1H), 7.38 – 7.26 (m, 6H), 7.09 – 7.04 (m, 1H), 6.83 (s, 1H), 4.89 (hept,  $J$  = 6.8 Hz, 1H), 1.63 (d,  $J$  = 6.8 Hz, 3H), 1.61 (d,  $J$  = 6.8 Hz, 3H).  $^{13}\text{C}$  NMR (100 MHz,  $\text{CDCl}_3$ )  $\delta$  = 187.7, 157.8, 152.4, 151.3, 142.5, 137.5, 135.7, 134.7, 132.6, 130.2, 128.6, 127.8, 127.5, 126.5, 123.2, 121.0, 112.3, 110.6, 56.6, 47.7, 22.6. HR-MS (ESI)  $m/z$  calcd for  $\text{C}_{24}\text{H}_{22}\text{N}_5\text{O}$   $[\text{M}+\text{H}]^+$  396.1819, found 396.1815. The structure of **7a** was confirmed by single-crystal X-ray diffraction analysis.

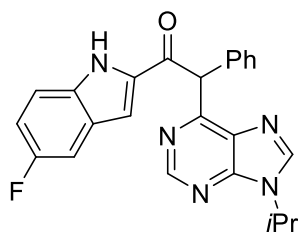

**1-(5-Fluoro-1H-indol-2-yl)-2-(9-isopropyl-9H-purin-6-yl)-2-phenylethan-1-one**

**(7b):** The mixture of **3ha** (0.1 mmol, 56 mg), AlCl<sub>3</sub> (0.5 mmol, 66 mg) and 2 mL DCM was stirred at 120 °C for 2 hours under N<sub>2</sub> atmosphere. Isolation by column chromatography (PE/EtOAc: 2/1→3/2) yielded **7b** (19 mg, 45%) as yellow solid. <sup>1</sup>H NMR (400 MHz, CDCl<sub>3</sub>)  $\delta$  = 9.85 (s, 1H), 8.94 (s, 1H), 8.17 (s, 1H), 7.71 (d,  $J$  = 7.1 Hz, 2H), 7.40 – 7.34 (m, 2H), 7.32 – 7.28 (m, 1H), 7.22 – 7.17 (m, 3H), 7.00 (td,  $J$  = 9.1, 2.5 Hz, 1H), 6.84 (s, 1H), 4.90 (hept,  $J$  = 6.8 Hz, 1H), 1.64 (d,  $J$  = 6.8 Hz, 3H), 1.62 (d,  $J$  = 6.8 Hz, 3H). <sup>13</sup>C NMR (100 MHz, CDCl<sub>3</sub>)  $\delta$  = 187.9, 158.1 (d,  $^1J_{C-F}$  = 236.1 Hz), 157.6, 152.4, 151.4, 142.6, 136.0, 135.6, 134.3, 133.2, 132.6, 130.2, 129.0, 128.7, 127.9, 127.6 (d,  $^3J_{C-F}$  = 9.0 Hz), 115.7 (d,  $^2J_{C-F}$  = 24.7 Hz), 113.5 (d,  $^3J_{C-F}$  = 8.9 Hz), 110.3 (d,  $^4J_{C-F}$  = 3.0 Hz), 107.1 (d,  $^2J_{C-F}$  = 25.6 Hz), 56.6, 47.8, 22.7. <sup>19</sup>F NMR (376 MHz, CDCl<sub>3</sub>)  $\delta$  = -122.44 – -122.50 (m). HR-MS (ESI)  $m/z$  calcd for C<sub>24</sub>H<sub>21</sub>FN<sub>5</sub>O [M+H]<sup>+</sup> 414.1725, found 414.1726.

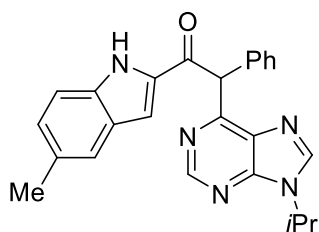

**2-(9-Isopropyl-9H-purin-6-yl)-1-(5-methyl-1H-indol-2-yl)-2-phenylethan-1-one**

**(7c):** The mixture of **3fa** (0.1 mmol, 56 mg), AlCl<sub>3</sub> (0.5 mmol, 66 mg) and 2 mL DCM was stirred at 120 °C for 2 hours under N<sub>2</sub> atmosphere. Isolation by column chromatography (PE/EtOAc: 2/1→3/2) yielded **7c** (24 mg, 59%) as yellow solid. <sup>1</sup>H NMR (400 MHz, CDCl<sub>3</sub>)  $\delta$  = 9.15 (s, 1H), 8.94 (s, 1H), 8.16 (s, 1H), 7.74 – 7.71 (m, 2H), 7.38 – 7.34 (m, 3H), 7.31 – 7.27 (m, 1H), 7.26 – 7.21 (m, 1H), 7.18 – 7.16 (m, 1H), 7.12 (d,  $J$  = 8.4 Hz, 1H), 6.83 (s, 1H), 4.90 (hept,  $J$  = 6.8 Hz, 1H), 2.38 (s, 3H),

1.64 (d,  $J = 6.8$  Hz, 3H), 1.62 (d,  $J = 6.8$  Hz, 3H).  $^{13}\text{C}$  NMR (100 MHz,  $\text{CDCl}_3$ )  $\delta =$  187.4, 157.7, 152.2, 151.4, 142.6, 136.0, 135.8, 134.7, 132.6, 130.9, 130.4, 130.3, 128.7, 127.9, 122.4, 121.7, 112.0, 110.2, 56.6, 47.8, 22.7, 21.5. HR-MS (ESI)  $m/z$  calcd for  $\text{C}_{25}\text{H}_{24}\text{N}_5\text{O}$   $[\text{M}+\text{H}]^+$  410.1975, found 410.1977.

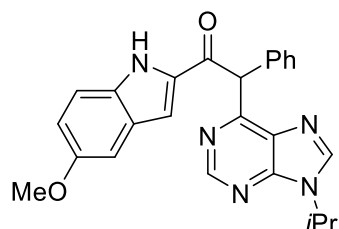

**2-(9-Isopropyl-9H-purin-6-yl)-1-(5-methoxy-1H-indol-2-yl)-2-phenylethan-1-one**

**(7d)**: The mixture of **3da** (0.1 mmol, 58 mg),  $\text{AlCl}_3$  (0.5 mmol, 66 mg) and 2 mL DCM was stirred at 120 °C for 2 hours under  $\text{N}_2$  atmosphere. Isolation by column chromatography (PE/EtOAc: 2/1→3/2) yielded **7d** (26 mg, 60%) as yellow solid.  $^1\text{H}$  NMR (400 MHz,  $\text{CDCl}_3$ )  $\delta =$  9.46 (s, 1H), 8.94 (s, 1H), 8.14 (s, 1H), 7.73 – 7.69 (m, 2H), 7.38 – 7.33 (m, 2H), 7.31 – 7.26 (m, 1H), 7.23 – 7.16 (m, 2H), 6.97 – 6.93 (m, 2H), 6.82 (s, 1H), 4.90 (hept,  $J = 6.8$  Hz, 1H), 3.79 (s, 3H), 1.64 (d,  $J = 6.8$  Hz, 3H), 1.62 (d,  $J = 6.8$  Hz, 3H).  $^{13}\text{C}$  NMR (100 MHz,  $\text{CDCl}_3$ )  $\delta =$  187.5, 157.9, 154.8, 152.4, 151.3, 142.5, 135.8, 135.1, 133.2, 133.2, 132.7, 130.2, 128.6, 127.8, 118.5, 113.4, 110.1, 102.6, 56.6, 55.7, 47.7, 22.7. HR-MS (ESI)  $m/z$  calcd for  $\text{C}_{25}\text{H}_{24}\text{N}_5\text{O}_2$   $[\text{M}+\text{H}]^+$  426.1925, found 426.1926.

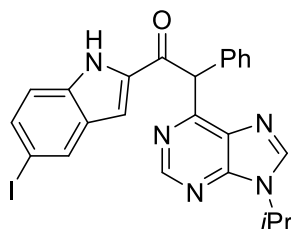

**1-(5-Iodo-1H-indol-2-yl)-2-(9-isopropyl-9H-purin-6-yl)-2-phenylethan-1-one (7e)**

The mixture of **3ja** (0.1 mmol, 68 mg),  $\text{AlCl}_3$  (0.5 mmol, 66 mg) and 2 mL DCM was stirred at 120 °C for 2 hours under  $\text{N}_2$  atmosphere. Isolation by column chromatography (PE/EtOAc: 2/1→3/2) yielded **7c** (29 mg, 56%) as yellow solid.  $^1\text{H}$



NMR (400 MHz, CDCl<sub>3</sub>)  $\delta$  = 9.78 (s, 1H), 8.93 (s, 1H), 8.16 (s, 1H), 7.71 – 7.68 (m, 2H), 7.51 – 7.43 (m, 2H), 7.38 – 7.34 (m, 2H), 7.32 – 7.28 (m, 1H), 7.12 – 7.10 (m, 1H), 7.07 – 7.04 (m, 1H), 6.81 (s, 1H), 4.90 (hept,  $J$  = 6.8 Hz, 1H), 1.65 (d,  $J$  = 6.8 Hz, 3H), 1.62 (d,  $J$  = 6.8 Hz, 3H). <sup>13</sup>C NMR (100 MHz, CDCl<sub>3</sub>)  $\delta$  = 188.0, 157.6, 152.4, 151.3, 142.7, 136.5, 135.5, 135.0, 134.6, 131.8, 130.2, 129.9, 128.7, 128.6, 128.3, 128.0, 114.4, 109.4, 84.2, 56.6, 47.8, 22.7. HR-MS (ESI)  $m/z$  calcd for C<sub>24</sub>H<sub>21</sub>IN<sub>5</sub>O [M+H]<sup>+</sup> 522.0785, found 522.0779.

## MTT Assay

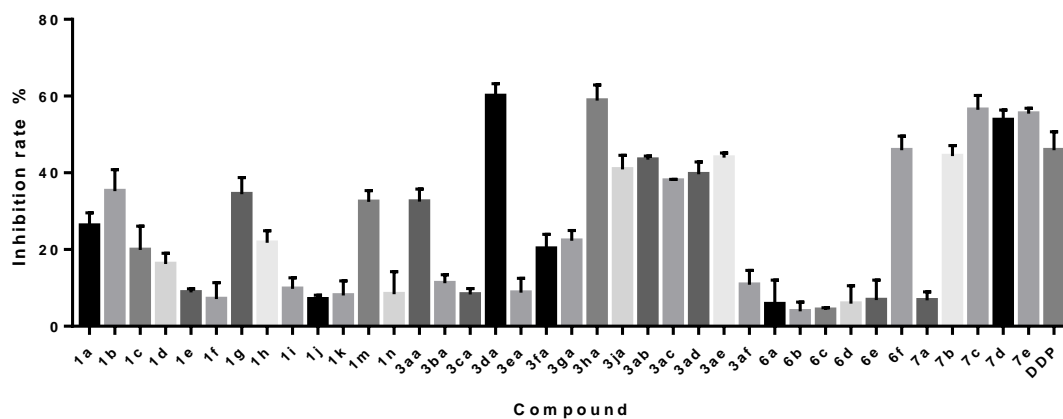

**Figure S1** The inhibiting ability of compounds with the concentration of 20  $\mu$ M of 48 h on the non-small cell lung cancer A549 cells.

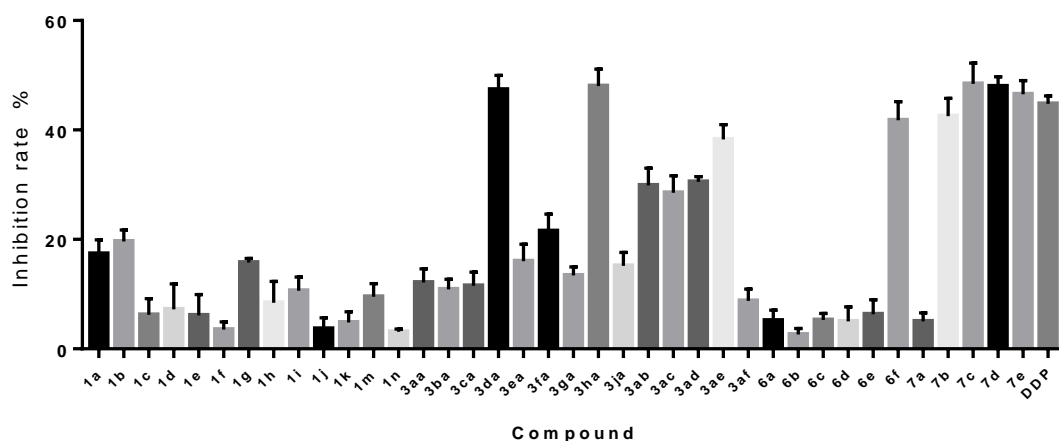

**Figure S2** The inhibiting ability of compounds with the concentration of 20  $\mu$ M of 48 h on the breast cancer MCF-7 cells.

## Wound healing assay

We investigated the migration inhibition capacity by wound healing assay. Cancer cell migration is a multistep process involving cell motility and invasion, which is a

significant characteristic of malignant tumors. In this assay, standardized scratches (wounds) were made in confluent monolayers of non-small cell lung cancer A549 cells and breast cancer MCF-7 cells, and then they incubated with compounds **3da**, **3ha** and **7c** with the concentration of 0 and 20  $\mu\text{M}$ . After the wounds were incubated 0 and 24 h, the number of cells migrated in to the wound area was captured by light microscope. As shown in Fig. S3 and S4, compound **3da**, **3ha** and **7c** showed significant inhibition of migration capacity in A549 cells and MCF-7 cells compared to control. These results indicated that compound **3da**, **3ha** and **7c** showed good antitumor activity.

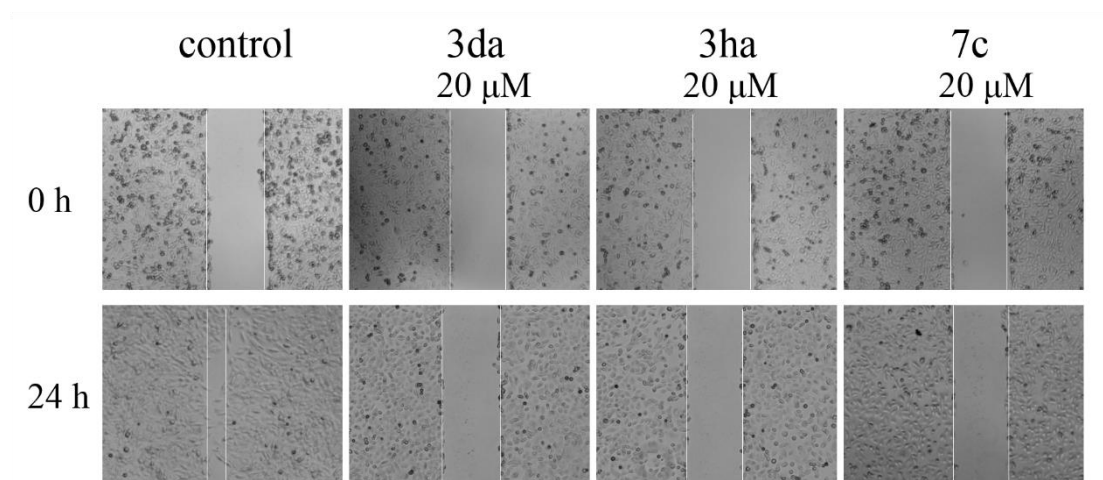

**Figure S3.** Effect of compound **3da**, **3ha** and **7c** on the migration of non-small cell lung cancer A549 cells. Scratches were created with sterile 10 m L pipette and images were captured using light microscope (Olympus CKX53) at 0 h and 24 h after treatment with 20  $\mu\text{M}$  of compounds.

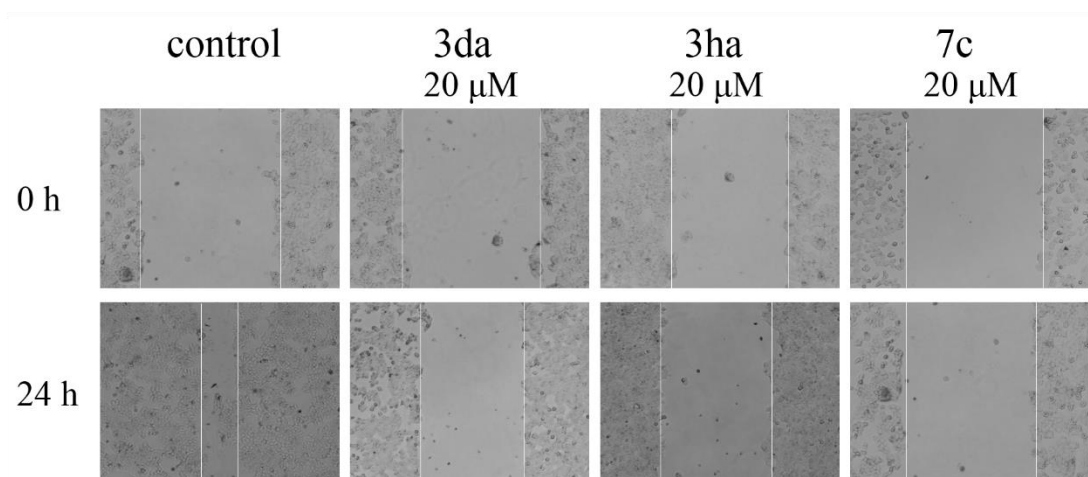

**Figure S4.** Effect of compound **3da**, **3ha** and **7c** on the migration of breast cancer MCF-7 cells. Scratches were created with sterile 10 m L pipette and images were captured using light microscope (Olympus CKX53) at 0 h and 24 h after treatment with 20  $\mu$ M of compounds.

### Crystallographic Details

The crystals were grown from a mixture of EtOAc and petroleum ether (b.p. 60–90 °C). Suitable single crystal was picked from the mother liquor and covered with perfluorinated polyether oil on a microscope slide.

Compounds **3aa**, **5a**, **6b** and **7a** were collected at 100 K on a Rigaku Oxford Diffraction Supernova Dual Source, Cu at Zero equipped with an AtlasS2 CCD using Cu K $\alpha$  radiation. Data reduction was carried out with the diffractometer's software<sup>[3]</sup>. The structure was solved by direct methods using Olex2 software<sup>[4]</sup>, and the non-hydrogen atoms were located from the trial structure and then refined anisotropically with SHELXL-2018<sup>[5]</sup> using a full-matrix least squares procedure based on  $F^2$ . The weighted  $R$  factor,  $wR$  and goodness-of-fit  $S$  values were obtained based on  $F^2$ . The hydrogen atom positions were fixed geometrically at the calculated distances and allowed to ride on their parent atoms. Crystallographic data has been deposited with the Cambridge Crystallographic Centre and allocated with the deposition numbers: CCDC 1874506, CCDC 1992409, CCDC 1992408, and CCDC 1992404 for compounds **3aa**, **5a**, **6b** and **7a**, respectively. Copies of the data can be obtained free of charge from The Cambridge Crystallographic Data Centre *via* [www.ccdc.cam.ac.uk/data\\_request/cif](http://www.ccdc.cam.ac.uk/data_request/cif).

### Crystal structure determination of 3aa

**Crystal Data** for  $\text{C}_{33}\text{H}_{36}\text{N}_6\text{O}_2$  ( $M=548.68$  g/mol): triclinic, space group P-1 (no. 2),  $a = 11.3769(9)$  Å,  $b = 12.1582(12)$  Å,  $c = 13.2260(8)$  Å,  $\alpha = 78.192(6)^\circ$ ,  $\beta = 79.374(6)^\circ$ ,  $\gamma = 63.184(9)^\circ$ ,  $V = 1589.3(2)$  Å<sup>3</sup>,  $Z = 2$ ,  $T = 100.00(10)$  K,  $\mu(\text{CuK}\alpha) = 0.583$  mm<sup>-1</sup>,  $D_{\text{calc}} = 1.147$  g/cm<sup>3</sup>, 10734 reflections measured ( $6.866^\circ \leq 2\Theta \leq 147.8^\circ$ ), 6204 unique ( $R_{\text{int}} = 0.0358$ ,  $R_{\text{sigma}} = 0.0379$ ) which were used in all calculations. The final  $R_1$  was 0.0680 ( $I > 2\sigma(I)$ ) and  $wR_2$  was 0.2031 (all data).

Crystal data and structure refinement for **3aa**.

|                                               |                                                               |
|-----------------------------------------------|---------------------------------------------------------------|
| Compound                                      | <b>3aa</b>                                                    |
| CCDC Number                                   | 1874506                                                       |
| Empirical formula                             | C <sub>33</sub> H <sub>36</sub> N <sub>6</sub> O <sub>2</sub> |
| Formula weight [g mol <sup>-1</sup> ]         | 548.68                                                        |
| Temperature [K]                               | 100.00(10)                                                    |
| Crystal system                                | triclinic                                                     |
| Space group                                   | P-1                                                           |
| Unit cell dimensions [Å]                      | a = 11.3769(9)                                                |
|                                               | b = 12.1582(12)                                               |
|                                               | c = 13.2260(8)                                                |
| α [°]                                         | 78.192(6)                                                     |
| β [°]                                         | 79.374(6)                                                     |
| γ [°]                                         | 63.184(9)                                                     |
| Volume [Å <sup>3</sup> ]                      | 1589.3(2)                                                     |
| Z                                             | 2                                                             |
| ρ <sub>calc</sub> [g cm <sup>-3</sup> ]       | 1.147                                                         |
| μ [mm <sup>-1</sup> ]                         | 0.583                                                         |
| F(000)                                        | 584                                                           |
| Crystal size [mm <sup>3</sup> ]               | 0.15 × 0.13 × 0.12                                            |
| Radiation                                     | CuKα (λ = 1.54184)                                            |
| Theta range for data collection [°]           | 6.866 to 147.8                                                |
| Index ranges                                  | -14 ≤ h ≤ 11, -15 ≤ k ≤ 13, -13 ≤ l ≤ 16                      |
| Reflections collected                         | 10734                                                         |
| Independent reflections                       | 6204 [R <sub>int</sub> = 0.0358, R <sub>sigma</sub> = 0.0379] |
| Data / restraints / parameters                | 6204 / 0 / 373                                                |
| Goodness-of-fit on F <sup>2</sup>             | 1.013                                                         |
| Final R indexes [I ≥ 2σ (I)]                  | R <sub>1</sub> = 0.0680<br>wR <sub>2</sub> = 0.1927           |
| Final R indexes (all data)                    | R <sub>1</sub> = 0.0757<br>wR <sub>2</sub> = 0.2031           |
| Largest diff. peak/hole [e. Å <sup>-3</sup> ] | 0.56 / -0.37                                                  |

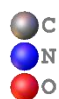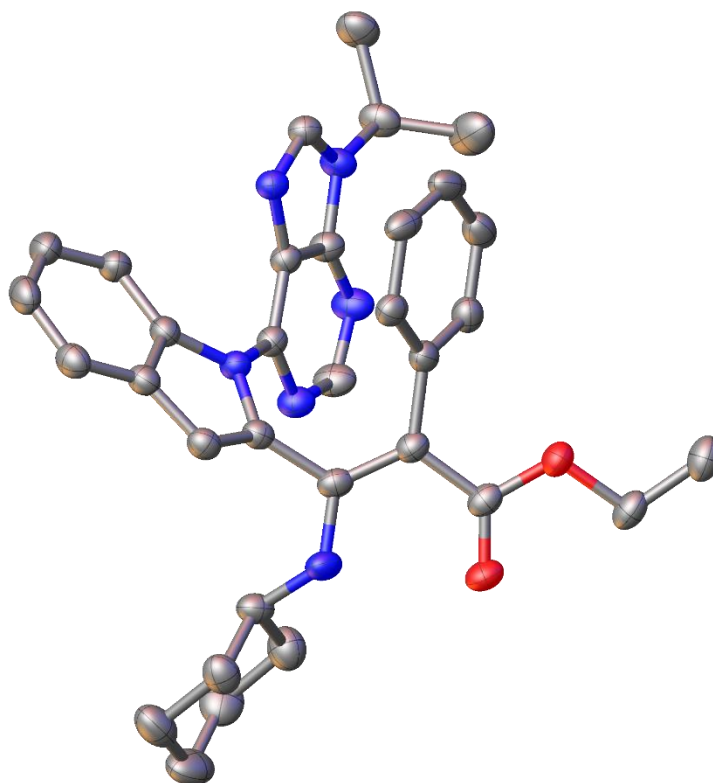

**Figure S1.** X-ray structure of **3aa**. Ellipsoids show 30% probability levels. H atoms are omitted for clarity.

Bond lengths [ $\text{\AA}$ ] and angles [ $^\circ$ ] of **3aa**

|        |          |            |            |             |            |
|--------|----------|------------|------------|-------------|------------|
| O2-C25 | 1.350(3) | C18-C19    | 1.512(3)   | N2-C13-N3   | 114.80(17) |
| O2-C32 | 1.457(2) | C18-C23    | 1.548(3)   | N6-C17-C7   | 114.17(17) |
| O1-C25 | 1.227(2) | C14-C16    | 1.510(3)   | N6-C17-C24  | 123.08(18) |
| N1-C6  | 1.392(3) | C14-C15    | 1.510(4)   | C24-C17-C7  | 122.36(17) |
| N1-C7  | 1.400(2) | C19-C20    | 1.504(3)   | N5-C9-N1    | 116.74(17) |
| N1-C9  | 1.403(2) | C23-C22    | 1.515(3)   | N5-C9-C12   | 120.36(18) |
| N2-C12 | 1.388(2) | C22-C21    | 1.513(4)   | C12-C9-N1   | 122.87(17) |
| N2-C13 | 1.307(2) | C20-C21    | 1.532(4)   | N3-C11-C12  | 105.42(17) |
| N3-C13 | 1.367(3) |            |            | N4-C11-N3   | 127.82(18) |
| N3-C11 | 1.372(3) | C25-O2-C32 | 115.20(16) | N4-C11-C12  | 126.70(18) |
| N3-C14 | 1.482(3) | C6-N1-C7   | 108.27(16) | C28-C27-C26 | 120.8(2)   |
| N5-C9  | 1.340(2) | C6-N1-C9   | 126.34(16) | C7-C8-C1    | 108.64(17) |
| N5-C10 | 1.346(3) | C7-N1-C9   | 124.96(16) | C27-C26-C24 | 122.89(18) |



|         |          |             |            |             |            |
|---------|----------|-------------|------------|-------------|------------|
| N6-C17  | 1.353(3) | C13-N2-C12  | 103.39(16) | C31-C26-C24 | 119.48(18) |
| N6-C18  | 1.457(3) | C13-N3-C11  | 105.74(16) | C31-C26-C27 | 117.62(18) |
| N4-C11  | 1.333(3) | C13-N3-C14  | 129.24(17) | C4-C5-C6    | 118.0(2)   |
| N4-C10  | 1.334(3) | C11-N3-C14  | 125.00(17) | C3-C2-C1    | 119.3(2)   |
| C6-C1   | 1.409(3) | C9-N5-C10   | 117.41(17) | C29-C28-C27 | 120.5(2)   |
| C6-C5   | 1.396(3) | C17-N6-C18  | 126.76(17) | O2-C32-C33  | 107.97(18) |
| C7-C17  | 1.493(3) | C10-N4-C11  | 111.59(18) | C5-C4-C3    | 121.3(2)   |
| C7-C8   | 1.356(3) | N1-C6-C1    | 107.64(17) | C30-C31-C26 | 121.3(2)   |
| C25-C24 | 1.464(3) | N1-C6-C5    | 130.92(18) | C28-C29-C30 | 119.5(2)   |
| C24-C17 | 1.382(3) | C5-C6-C1    | 121.28(18) | N6-C18-C19  | 110.20(17) |
| C24-C26 | 1.488(3) | N1-C7-C17   | 125.23(17) | N6-C18-C23  | 108.75(18) |
| C12-C9  | 1.391(3) | C8-C7-N1    | 108.78(17) | C19-C18-C23 | 110.02(19) |
| C12-C11 | 1.399(3) | C8-C7-C17   | 125.56(18) | N3-C14-C16  | 110.79(18) |
| C1-C8   | 1.424(3) | O2-C25-C24  | 114.50(17) | N3-C14-C15  | 109.93(19) |
| C1-C2   | 1.401(3) | O1-C25-O2   | 119.78(18) | C15-C14-C16 | 112.1(2)   |
| C27-C26 | 1.396(3) | O1-C25-C24  | 125.72(19) | C2-C3-C4    | 120.7(2)   |
| C27-C28 | 1.392(3) | C25-C24-C26 | 118.99(17) | C29-C30-C31 | 120.3(2)   |
| C26-C31 | 1.397(3) | C17-C24-C25 | 118.77(18) | N4-C10-N5   | 128.6(2)   |
| C5-C4   | 1.383(3) | C17-C24-C26 | 122.16(17) | C18-C19-C20 | 112.63(19) |
| C2-C3   | 1.378(3) | N2-C12-C9   | 133.86(18) | C22-C23-C18 | 112.0(2)   |
| C28-C29 | 1.377(3) | N2-C12-C11  | 110.64(16) | C21-C22-C23 | 111.4(2)   |
| C32-C33 | 1.492(3) | C9-C12-C11  | 115.36(17) | C19-C20-C21 | 110.1(2)   |
| C4-C3   | 1.401(3) | C6-C1-C8    | 106.68(17) | C22-C21-C20 | 110.4(2)   |
| C31-C30 | 1.382(3) | C2-C1-C6    | 119.42(19) |             |            |
| C29-C30 | 1.381(4) | C2-C1-C8    | 133.85(19) |             |            |

## Crystal structure determination of 5a

**Crystal Data** for  $\text{C}_{20}\text{H}_{14}\text{MnN}_5\text{O}_4$  ( $M = 443.30$  g/mol): monoclinic, space group C2/c (no. 15),  $a = 23.612(6)$  Å,  $b = 6.3254(14)$  Å,  $c = 25.263(7)$  Å,  $\beta = 97.31(3)^\circ$ ,  $V = 3742.6(17)$  Å<sup>3</sup>,  $Z = 8$ ,  $T = 100.00(10)$  K,  $\mu(\text{Mo K}\alpha) = 0.745$  mm<sup>-1</sup>,  $D_{\text{calc}} = 1.573$  g/cm<sup>3</sup>, 11051 reflections measured ( $4.448^\circ \leq 2\Theta \leq 49.992^\circ$ ), 3249 unique ( $R_{\text{int}} = 0.0721$ ,  $R_{\text{sigma}} = 0.0876$ ) which were used in all calculations. The final  $R_1$  was 0.0491 ( $I > 2\sigma(I)$ ) and  $wR_2$  was 0.1026 (all data)

Crystal data and structure refinement for **5a**.

|                                               |                                                                 |
|-----------------------------------------------|-----------------------------------------------------------------|
| Compound                                      | <b>5a</b>                                                       |
| CCDC Number                                   | 1992409                                                         |
| Empirical formula                             | C <sub>20</sub> H <sub>14</sub> MnN <sub>5</sub> O <sub>4</sub> |
| Formula weight [g mol <sup>-1</sup> ]         | 443.3                                                           |
| Temperature [K]                               | 100.00(10)                                                      |
| Crystal system                                | monoclinic                                                      |
| Space group                                   | C2 / c                                                          |
| Unit cell dimensions [Å]                      | a = 23.612(6)                                                   |
|                                               | b = 6.3254(14)                                                  |
|                                               | c = 25.263(7)                                                   |
| α [°]                                         | 90                                                              |
| β [°]                                         | 101.597(8)                                                      |
| γ [°]                                         | 90                                                              |
| Volume [Å <sup>3</sup> ]                      | 3742.6(17)                                                      |
| Z                                             | 8                                                               |
| ρ <sub>calc</sub> [g cm <sup>-3</sup> ]       | 1.573                                                           |
| μ [mm <sup>-1</sup> ]                         | 0.745                                                           |
| F(000)                                        | 1808                                                            |
| Crystal size [mm <sup>3</sup> ]               | 0.12 × 0.1 × 0.08                                               |
| Radiation                                     | MoKα (λ = 0.71073)                                              |
| Theta range for data collection [°]           | 4.448 to 49.992                                                 |
| Index ranges                                  | -26 ≤ h ≤ 28, -7 ≤ k ≤ 7, -29 ≤ l ≤ 30                          |
| Reflections collected                         | 11051                                                           |
| Independent reflections                       | 3249 [R <sub>int</sub> = 0.0721, R <sub>sigma</sub> = 0.0876]   |
| Data / restraints / parameters                | 3249 / 0 / 273                                                  |
| Goodness-of-fit on F <sup>2</sup>             | 1.09                                                            |
| Final R indexes [I ≥ 2σ (I)]                  | R <sub>1</sub> = 0.0491<br>wR <sub>2</sub> = 0.0858             |
| Final R indexes (all data)                    | R <sub>1</sub> = 0.0769<br>wR <sub>2</sub> = 0.1026             |
| Largest diff. peak/hole [e. Å <sup>-3</sup> ] | 0.35 / -0.34                                                    |

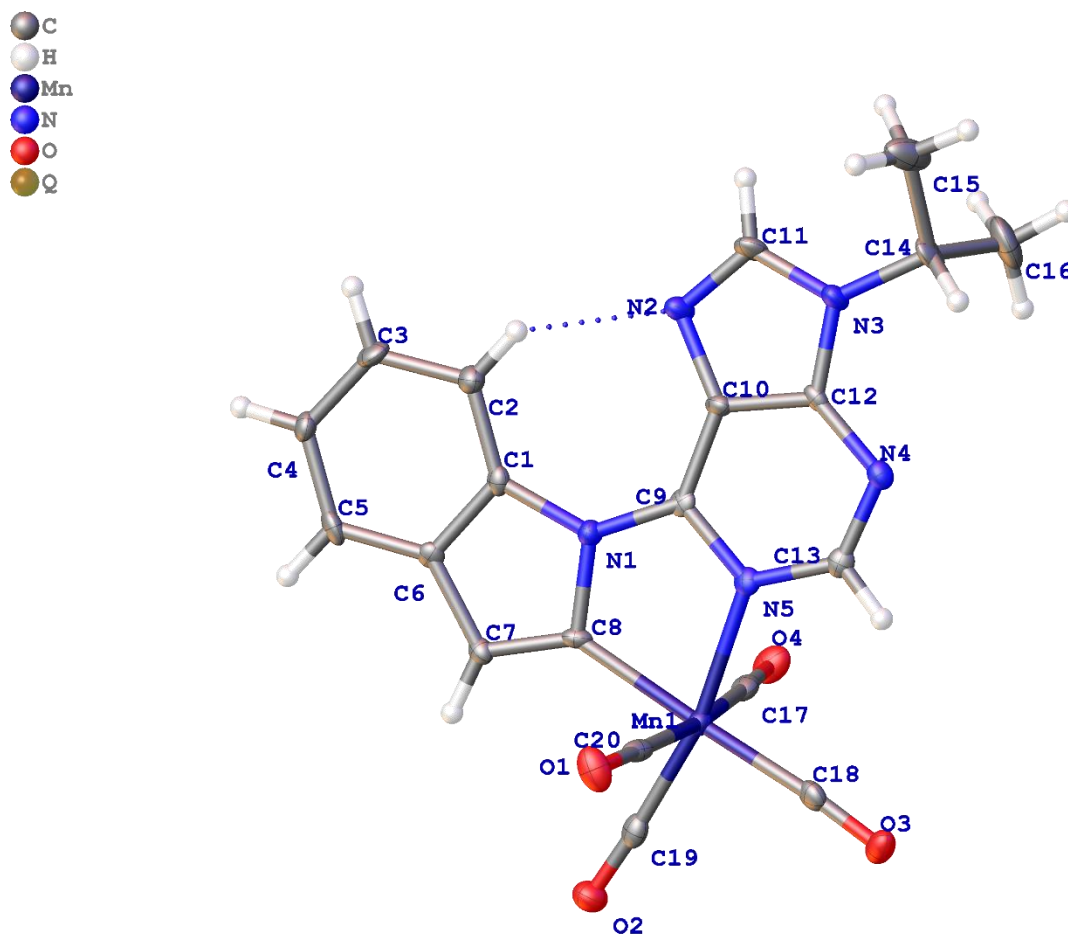

**Figure S2.** X-ray structure of **5a**. Ellipsoids show 30% probability levels.

Bond lengths [Å] and angles [°] of **5a**

|         |          |             |            |           |          |
|---------|----------|-------------|------------|-----------|----------|
| Mn1-N5  | 2.063(3) | C14-C15     | 1.520(5)   | C1-C2-C3  | 117.1(3) |
| Mn1-C8  | 2.002(3) | C14-C16     | 1.512(6)   | C2-C3-C4  | 121.7(3) |
| Mn1-C17 | 1.848(4) |             |            | C5-C4-C3  | 120.4(3) |
| Mn1-C18 | 1.833(4) | C8-Mn1-N5   | 78.33(13)  | C4-C5-C6  | 119.1(3) |
| Mn1-C19 | 1.799(4) | C17-Mn1-N5  | 86.43(14)  | C1-C6-C5  | 119.4(3) |
| Mn1-C20 | 1.858(4) | C17-Mn1-C8  | 87.51(15)  | C1-C6-C7  | 108.7(3) |
| O1-C20  | 1.134(4) | C17-Mn1-C20 | 172.72(16) | C5-C6-C7  | 131.9(3) |
| O2-C19  | 1.149(4) | C18-Mn1-N5  | 98.95(14)  | C8-C7-C6  | 109.4(3) |
| O3-C18  | 1.150(4) | C18-Mn1-C8  | 176.67(15) | N1-C8-Mn1 | 114.1(2) |
| O4-C17  | 1.149(4) | C18-Mn1-C17 | 94.26(16)  | C7-C8-Mn1 | 138.5(3) |
| N1-C1   | 1.429(4) | C18-Mn1-C20 | 92.95(16)  | C7-C8-N1  | 107.4(3) |
| N1-C8   | 1.426(4) | C19-Mn1-N5  | 167.40(14) | N1-C9-N5  | 113.2(3) |
| N1-C9   | 1.367(4) | C19-Mn1-C8  | 89.44(15)  | N1-C9-C10 | 129.8(3) |

|         |          |             |           |             |          |
|---------|----------|-------------|-----------|-------------|----------|
| N2-C10  | 1.387(4) | C19-Mn1-C17 | 90.06(16) | N5-C9-C10   | 117.0(3) |
| N2-C11  | 1.310(4) | C19-Mn1-C18 | 93.37(16) | N2-C10-C9   | 134.0(3) |
| N3-C11  | 1.367(5) | C19-Mn1-C20 | 88.54(16) | N2-C10-C12  | 109.5(3) |
| N3-C12  | 1.367(4) | C20-Mn1-N5  | 93.41(13) | C9-C10-C12  | 116.5(3) |
| N3-C14  | 1.480(4) | C20-Mn1-C8  | 85.33(15) | N2-C11-N3   | 114.2(3) |
| N4-C12  | 1.346(4) | C8-N1-C1    | 109.1(3)  | N3-C12-C10  | 106.3(3) |
| N4-C13  | 1.311(4) | C9-N1-C1    | 133.4(3)  | N4-C12-N3   | 126.2(3) |
| N5-C9   | 1.370(4) | C9-N1-C8    | 117.6(3)  | N4-C12-C10  | 127.5(3) |
| N5-C13  | 1.359(4) | C11-N2-C10  | 104.3(3)  | N4-C13-N5   | 127.9(3) |
| C1-C2   | 1.384(5) | C11-N3-C12  | 105.7(3)  | N3-C14-C15  | 109.7(3) |
| C1-C6   | 1.397(5) | C11-N3-C14  | 128.8(3)  | N3-C14-C16  | 109.6(3) |
| C2-C3   | 1.395(5) | C12-N3-C14  | 125.4(3)  | C16-C14-C15 | 112.8(4) |
| C3-C4   | 1.395(5) | C13-N4-C12  | 111.3(3)  | O4-C17-Mn1  | 178.4(3) |
| C4-C5   | 1.377(5) | C9-N5-Mn1   | 116.4(2)  | O3-C18-Mn1  | 175.6(3) |
| C5-C6   | 1.403(5) | C13-N5-Mn1  | 123.7(2)  | O2-C19-Mn1  | 176.5(3) |
| C6-C7   | 1.430(5) | C13-N5-C9   | 119.6(3)  | O1-C20-Mn1  | 175.6(3) |
| C7-C8   | 1.348(5) | C2-C1-N1    | 132.3(3)  |             |          |
| C9-C10  | 1.392(5) | C2-C1-C6    | 122.3(3)  |             |          |
| C10-C12 | 1.401(5) | C6-C1-N1    | 105.5(3)  |             |          |

## Crystal structure determination of 6b

**Crystal Data** for  $C_{31}H_{29}FN_6O$  ( $M = 520.60$  g/mol): monoclinic, space group  $P2_1/n$  (no. 14),  $a = 13.5375(12)$  Å,  $b = 12.2153(10)$  Å,  $c = 16.3297(14)$  Å,  $\beta = 102.160(9)^\circ$ ,  $V = 2639.8(4)$  Å<sup>3</sup>,  $Z = 4$ ,  $T = 293(2)$  K,  $\mu(\text{Mo K}\alpha) = 0.087$  mm<sup>-1</sup>,  $D_{\text{calc}} = 1.310$  g/cm<sup>3</sup>, 11453 reflections measured ( $4.198^\circ \leq 2\Theta \leq 49.996^\circ$ ), 4658 unique ( $R_{\text{int}} = 0.0378$ ,  $R_{\text{sigma}} = 0.0534$ ) which were used in all calculations. The final  $R_1$  was 0.0567 ( $I > 2\sigma(I)$ ) and  $wR_2$  was 0.1236 (all data).

Crystal data and structure refinement for **6b**.

|                                               |                                                               |
|-----------------------------------------------|---------------------------------------------------------------|
| Compound                                      | <b>6b</b>                                                     |
| CCDC Number                                   | 1992408                                                       |
| Empirical formula                             | C <sub>31</sub> H <sub>29</sub> FN <sub>6</sub> O             |
| Formula weight [g mol <sup>-1</sup> ]         | 520.6                                                         |
| Temperature [K]                               | 293(2)                                                        |
| Crystal system                                | monoclinic                                                    |
| Space group                                   | P2 <sub>1</sub> / n                                           |
| Unit cell dimensions [Å]                      | a = 13.5375(12)                                               |
|                                               | b = 12.2153(10)                                               |
|                                               | c = 16.3297(14)                                               |
| α [°]                                         | 90                                                            |
| β [°]                                         | 102.160(9)                                                    |
| γ [°]                                         | 90                                                            |
| Volume [Å <sup>3</sup> ]                      | 2639.8(4)                                                     |
| Z                                             | 4                                                             |
| ρ <sub>calc</sub> [g cm <sup>-3</sup> ]       | 1.31                                                          |
| μ [mm <sup>-1</sup> ]                         | 0.087                                                         |
| F(000)                                        | 1096                                                          |
| Crystal size [mm <sup>3</sup> ]               | 0.14 × 0.12 × 0.11                                            |
| Radiation                                     | MoKα (λ = 0.71073)                                            |
| Theta range for data collection [°]           | 4.198 to 49.996                                               |
| Index ranges                                  | -14 ≤ h ≤ 16, -14 ≤ k ≤ 11, -16 ≤ l ≤ 19                      |
| Reflections collected                         | 11453                                                         |
| Independent reflections                       | 4658 [R <sub>int</sub> = 0.0378, R <sub>sigma</sub> = 0.0534] |
| Data / restraints / parameters                | 4658 / 0 / 354                                                |
| Goodness-of-fit on F <sup>2</sup>             | 1.054                                                         |
| Final R indexes [I ≥ 2σ (I)]                  | R <sub>1</sub> = 0.0567<br>wR <sub>2</sub> = 0.1075           |
| Final R indexes (all data)                    | R <sub>1</sub> = 0.0919<br>wR <sub>2</sub> = 0.1236           |
| Largest diff. peak/hole [e. Å <sup>-3</sup> ] | 0.17 / -0.19                                                  |

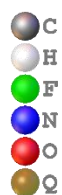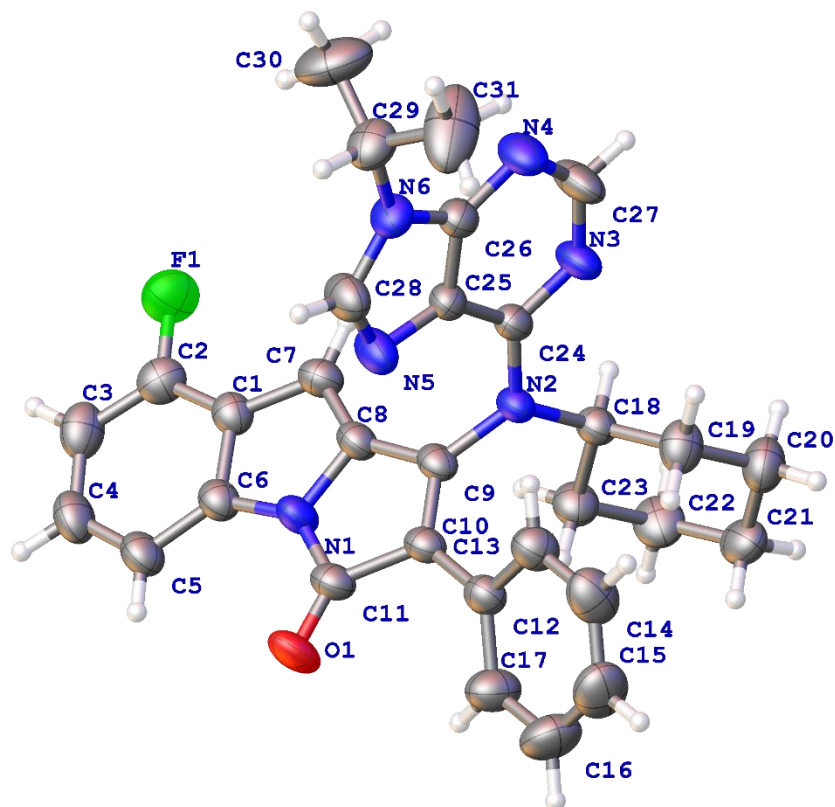

**Figure S3.** X-ray structure of **6b**. Ellipsoids show 30% probability levels.

Bond lengths [ $\text{\AA}$ ] and angles [ $^\circ$ ] of **6b**

|        |          |            |            |             |          |
|--------|----------|------------|------------|-------------|----------|
| F1-C2  | 1.358(3) | C20-C21    | 1.507(4)   | C10-C9-C8   | 109.4(2) |
| O1-C11 | 1.208(3) | C21-C22    | 1.502(4)   | C9-C10-C11  | 107.9(2) |
| N1-C6  | 1.399(3) | C22-C23    | 1.530(3)   | C9-C10-C12  | 130.0(2) |
| N1-C8  | 1.388(3) | C24-C25    | 1.410(3)   | C12-C10-C11 | 122.1(2) |
| N1-C11 | 1.395(3) | C25-C26    | 1.382(3)   | O1-C11-N1   | 125.3(2) |
| N2-C9  | 1.416(3) | C29-C30    | 1.469(4)   | O1-C11-C10  | 129.8(2) |
| N2-C18 | 1.502(3) | C29-C31    | 1.481(4)   | N1-C11-C10  | 104.9(2) |
| N2-C24 | 1.372(3) |            |            | C13-C12-C10 | 120.9(2) |
| N3-C24 | 1.336(3) | C8-N1-C6   | 109.7(2)   | C13-C12-C17 | 118.5(3) |
| N3-C27 | 1.341(3) | C8-N1-C11  | 111.4(2)   | C17-C12-C10 | 120.6(2) |
| N4-C26 | 1.342(3) | C11-N1-C6  | 138.9(2)   | C14-C13-C12 | 120.3(3) |
| N4-C27 | 1.326(3) | C9-N2-C18  | 119.74(17) | C15-C14-C13 | 120.4(3) |
| N5-C25 | 1.386(3) | C24-N2-C9  | 120.02(17) | C16-C15-C14 | 120.1(3) |
| N5-C28 | 1.305(3) | C24-N2-C18 | 119.39(18) | C15-C16-C17 | 120.2(3) |



|         |          |            |            |             |            |
|---------|----------|------------|------------|-------------|------------|
| N6-C26  | 1.372(3) | C24-N3-C27 | 118.0(2)   | C16-C17-C12 | 120.5(3)   |
| N6-C28  | 1.354(3) | C27-N4-C26 | 110.7(2)   | N2-C18-C19  | 110.96(18) |
| N6-C29  | 1.474(3) | C28-N5-C25 | 103.2(2)   | N2-C18-C23  | 112.12(19) |
| C1-C2   | 1.380(3) | C26-N6-C29 | 129.7(2)   | C19-C18-C23 | 110.5(2)   |
| C1-C6   | 1.409(3) | C28-N6-C26 | 105.08(19) | C18-C19-C20 | 111.3(2)   |
| C1-C7   | 1.445(3) | C28-N6-C29 | 125.2(2)   | C21-C20-C19 | 111.0(2)   |
| C2-C3   | 1.376(4) | C2-C1-C6   | 116.6(2)   | C22-C21-C20 | 110.9(2)   |
| C3-C4   | 1.386(4) | C2-C1-C7   | 134.9(2)   | C21-C22-C23 | 111.4(2)   |
| C4-C5   | 1.380(4) | C6-C1-C7   | 108.5(2)   | C18-C23-C22 | 110.2(2)   |
| C5-C6   | 1.376(3) | F1-C2-C1   | 118.6(2)   | N2-C24-C25  | 123.6(2)   |
| C7-C8   | 1.346(3) | F1-C2-C3   | 119.7(3)   | N3-C24-N2   | 117.99(19) |
| C8-C9   | 1.455(3) | C3-C2-C1   | 121.6(3)   | N3-C24-C25  | 118.4(2)   |
| C9-C10  | 1.353(3) | C2-C3-C4   | 119.2(3)   | N5-C25-C24  | 132.8(2)   |
| C10-C11 | 1.502(3) | C5-C4-C3   | 122.2(3)   | C26-C25-N5  | 110.3(2)   |
| C10-C12 | 1.468(3) | C6-C5-C4   | 116.5(3)   | C26-C25-C24 | 116.7(2)   |
| C12-C13 | 1.388(3) | N1-C6-C1   | 105.3(2)   | N4-C26-N6   | 127.3(2)   |
| C12-C17 | 1.389(3) | C5-C6-N1   | 131.0(2)   | N4-C26-C25  | 126.5(2)   |
| C13-C14 | 1.374(4) | C5-C6-C1   | 123.7(2)   | N6-C26-C25  | 106.2(2)   |
| C14-C15 | 1.373(4) | C8-C7-C1   | 106.7(2)   | N4-C27-N3   | 129.7(2)   |
| C15-C16 | 1.364(4) | N1-C8-C9   | 106.4(2)   | N5-C28-N6   | 115.2(2)   |
| C16-C17 | 1.380(4) | C7-C8-N1   | 109.8(2)   | N6-C29-C31  | 111.4(2)   |
| C18-C19 | 1.510(3) | C7-C8-C9   | 143.8(2)   | C30-C29-N6  | 110.8(2)   |
| C18-C23 | 1.514(3) | N2-C9-C8   | 122.1(2)   | C30-C29-C31 | 115.9(3)   |
| C19-C20 | 1.521(3) | C10-C9-N2  | 128.3(2)   |             |            |

## Crystal structure determination of 7a

**Crystal Data** for  $\text{C}_{24}\text{H}_{21}\text{N}_5\text{O}$  ( $M = 395.46$  g/mol): triclinic, space group P-1 (no. 2),  $a = 12.7739(5)$  Å,  $b = 13.0372(6)$  Å,  $c = 13.9428(5)$  Å,  $\alpha = 99.281(3)^\circ$ ,  $\beta = 90.056(3)^\circ$ ,  $\gamma = 107.625(4)^\circ$ ,  $V = 2180.95(16)$  Å<sup>3</sup>,  $Z = 4$ ,  $T = 100.00(10)$  K,  $\mu(\text{CuK}\alpha) = 0.613$  mm<sup>-1</sup>,  $D_{\text{calc}} = 1.204$  g/cm<sup>3</sup>, 15562 reflections measured ( $6.432^\circ \leq 2\Theta \leq 147.044^\circ$ ), 8529 unique ( $R_{\text{int}} = 0.0408$ ,  $R_{\text{sigma}} = 0.0544$ ) which were used in all calculations. The final  $R_1$  was 0.0616 ( $I > 2\sigma(I)$ ) and  $wR_2$  was 0.1742 (all data).

Crystal data and structure refinement for **7a**.

|                                               |                                                               |
|-----------------------------------------------|---------------------------------------------------------------|
| Compound                                      | <b>7a</b>                                                     |
| CCDC Number                                   | 1992404                                                       |
| Empirical formula                             | C <sub>24</sub> H <sub>21</sub> N <sub>5</sub> O              |
| Formula weight [g mol <sup>-1</sup> ]         | 395.46                                                        |
| Temperature [K]                               | 100.00(10)                                                    |
| Crystal system                                | triclinic                                                     |
| Space group                                   | P-1                                                           |
| Unit cell dimensions [Å]                      | a = 12.7739(5)                                                |
|                                               | b = 13.0372(6)                                                |
|                                               | c = 13.9428(5)                                                |
| α [°]                                         | 99.281(3)                                                     |
| β [°]                                         | 90.056(3)                                                     |
| γ [°]                                         | 107.625(4)                                                    |
| Volume [Å <sup>3</sup> ]                      | 2180.95(16)                                                   |
| Z                                             | 4                                                             |
| ρ <sub>calc</sub> [g cm <sup>-3</sup> ]       | 1.204                                                         |
| μ [mm <sup>-1</sup> ]                         | 0.613                                                         |
| F(000)                                        | 832                                                           |
| Crystal size [mm <sup>3</sup> ]               | 0.14 × 0.12 × 0.11                                            |
| Radiation                                     | CuKα (λ = 1.54184)                                            |
| Theta range for data collection [°]           | 6.432 to 147.044                                              |
| Index ranges                                  | -10 ≤ h ≤ 15, -16 ≤ k ≤ 15, -17 ≤ l ≤ 17                      |
| Reflections collected                         | 15562                                                         |
| Independent reflections                       | 8529 [R <sub>int</sub> = 0.0408, R <sub>sigma</sub> = 0.0544] |
| Data / restraints / parameters                | 8259 / 0 / 545                                                |
| Goodness-of-fit on F <sup>2</sup>             | 1.066                                                         |
| Final R indexes [I ≥ 2σ (I)]                  | R <sub>1</sub> = 0.0616<br>wR <sub>2</sub> = 0.1657           |
| Final R indexes (all data)                    | R <sub>1</sub> = 0.0730<br>wR <sub>2</sub> = 0.1742           |
| Largest diff. peak/hole [e. Å <sup>-3</sup> ] | 0.55 / -0.36                                                  |

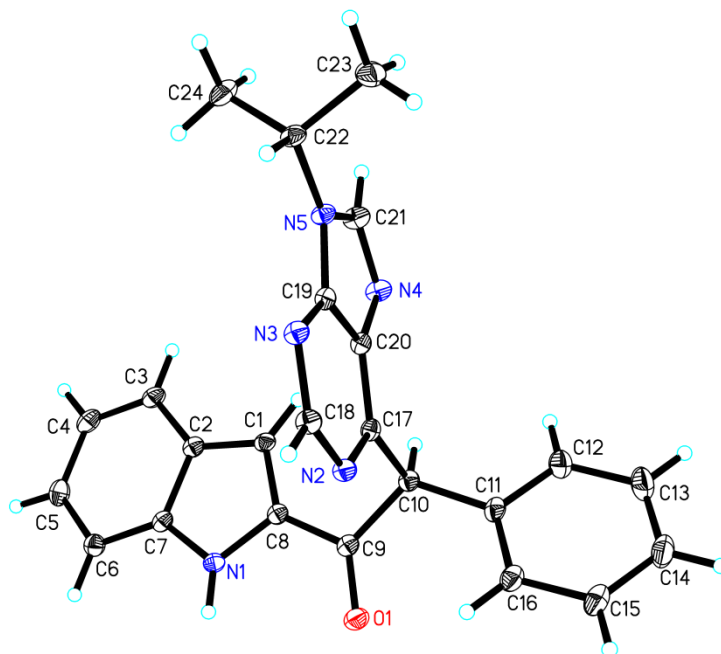

**Figure S4.** X-ray structure of **7a**. Ellipsoids show 50% probability levels.

Bond lengths [ $\text{\AA}$ ] and angles [ $^\circ$ ] of **7a**

|         |          |           |          |                |            |
|---------|----------|-----------|----------|----------------|------------|
| O1B-C9B | 1.219(3) | C16B-C15B | 1.390(4) | O1B-C9B-C10B   | 123.1(2)   |
| O1-C9   | 1.223(3) | C6B-C5B   | 1.384(4) | C8B-C9B-C10B   | 115.8(2)   |
| N1B-C8B | 1.377(3) | C12B-C13B | 1.390(4) | N2B-C17B-C10B  | 118.7(2)   |
| N1B-C7B | 1.367(3) | C4-C5     | 1.407(4) | N2B-C17B-C20B  | 118.6(2)   |
| N1-C8   | 1.384(3) | C16-C15   | 1.389(4) | C20B-C17B-C10B | 122.6(2)   |
| N1-C7   | 1.370(3) | C13B-C14B | 1.386(4) | C8-C1-C2       | 107.2(2)   |
| N2-C17  | 1.348(3) | C14B-C15B | 1.384(4) | C4B-C3B-C2B    | 118.8(2)   |
| N2-C18  | 1.343(3) | C12-C13   | 1.392(4) | C17B-C10B-C9B  | 106.91(18) |
| N3-C19  | 1.338(3) | C15-C14   | 1.384(4) | C11B-C10B-C9B  | 115.46(19) |

|           |          |               |            |                |            |
|-----------|----------|---------------|------------|----------------|------------|
| N3-C18    | 1.338(3) | C22B-C23B     | 1.494(4)   | C11B-C10B-C17B | 111.16(19) |
| N5-C19    | 1.376(3) | C22B-C24B     | 1.524(4)   | C1B-C2B-C7B    | 106.8(2)   |
| N5-C22    | 1.472(3) | C14-C13       | 1.378(5)   | C3B-C2B-C1B    | 134.3(2)   |
| N5-C21    | 1.376(3) |               |            | C3B-C2B-C7B    | 118.8(2)   |
| N2B-C17B  | 1.343(3) | C7B-N1B-C8B   | 109.01(19) | C17-C10-C9     | 107.60(18) |
| N2B-C18B  | 1.345(3) | C7-N1-C8      | 108.64(19) | C17-C10-C11    | 109.64(18) |
| N4-C20    | 1.389(3) | C18-N2-C17    | 118.73(19) | C11-C10-C9     | 117.33(19) |
| N4-C21    | 1.315(3) | C18-N3-C19    | 111.28(19) | N3-C18-N2      | 128.4(2)   |
| N3B-C19B  | 1.337(3) | C19-N5-C22    | 127.71(18) | C16B-C11B-C10B | 119.2(2)   |
| N3B-C18B  | 1.338(3) | C19-N5-C21    | 104.82(18) | C16B-C11B-C12B | 118.7(2)   |
| N4B-C19B  | 1.372(3) | C21-N5-C22    | 127.44(19) | C12B-C11B-C10B | 122.0(2)   |
| N4B-C21B  | 1.379(3) | C17B-N2B-C18B | 118.7(2)   | N5B-C20B-C19B  | 110.2(2)   |
| N4B-C22B  | 1.485(3) | C21-N4-C20    | 103.26(19) | C17B-C20B-N5B  | 132.8(2)   |
| N5B-C20B  | 1.388(3) | C19B-N3B-C18B | 111.3(2)   | C17B-C20B-C19B | 116.9(2)   |
| N5B-C21B  | 1.318(3) | C19B-N4B-C21B | 105.31(19) | N3B-C19B-N4B   | 127.6(2)   |
| C20-C19   | 1.396(3) | C19B-N4B-C22B | 125.5(2)   | N3B-C19B-C20B  | 126.1(2)   |
| C20-C17   | 1.388(3) | C21B-N4B-C22B | 128.9(2)   | N4B-C19B-C20B  | 106.3(2)   |
| C17-C10   | 1.515(3) | C21B-N5B-C20B | 103.75(19) | C16-C11-C10    | 123.0(2)   |
| C2-C7     | 1.418(3) | N4-C20-C19    | 110.54(19) | C16-C11-C12    | 118.5(2)   |
| C2-C1     | 1.412(3) | C17-C20-N4    | 132.3(2)   | C12-C11-C10    | 118.3(2)   |
| C2-C3     | 1.416(3) | C17-C20-C19   | 117.2(2)   | N5-C22-C24     | 109.91(19) |
| C1B-C8B   | 1.381(3) | N3-C19-N5     | 127.5(2)   | N5-C22-C23     | 110.1(2)   |
| C1B-C2B   | 1.419(3) | N3-C19-C20    | 126.2(2)   | C23-C22-C24    | 112.2(2)   |
| C8B-C9B   | 1.470(3) | N5-C19-C20    | 106.35(18) | N4-C21-N5      | 115.0(2)   |
| C8-C9     | 1.469(3) | N2-C17-C20    | 118.2(2)   | C3B-C4B-C5B    | 121.7(2)   |
| C8-C1     | 1.379(3) | N2-C17-C10    | 118.44(19) | C5-C6-C7       | 116.8(2)   |
| C7B-C2B   | 1.421(3) | C20-C17-C10   | 123.30(19) | C4-C3-C2       | 118.6(2)   |
| C7B-C6B   | 1.400(3) | C1-C2-C7      | 107.1(2)   | C11B-C16B-C15B | 120.9(2)   |
| C9-C10    | 1.529(3) | C1-C2-C3      | 133.9(2)   | C5B-C6B-C7B    | 117.4(2)   |
| C7-C6     | 1.397(3) | C3-C2-C7      | 119.0(2)   | C13B-C12B-C11B | 120.2(2)   |
| C9B-C10B  | 1.532(3) | C8B-C1B-C2B   | 107.0(2)   | N3B-C18B-N2B   | 128.3(2)   |
| C17B-C10B | 1.524(3) | N1B-C8B-C1B   | 109.4(2)   | C3-C4-C5       | 121.5(2)   |
| C17B-C20B | 1.384(3) | N1B-C8B-C9B   | 119.5(2)   | C15-C16-C11    | 120.7(3)   |
| C3B-C2B   | 1.413(3) | C1B-C8B-C9B   | 131.1(2)   | C14B-C13B-C12B | 120.6(2)   |
| C3B-C4B   | 1.371(4) | N1-C8-C9      | 120.0(2)   | C6B-C5B-C4B    | 121.2(2)   |
| C10B-C11B | 1.520(3) | C1-C8-N1      | 109.2(2)   | N5B-C21B-N4B   | 114.5(2)   |
| C10-C11   | 1.518(3) | C1-C8-C9      | 130.7(2)   | C15B-C14B-C13B | 119.4(2)   |
| C11B-C16B | 1.388(3) | N1B-C7B-C2B   | 107.8(2)   | C6-C5-C4       | 121.8(2)   |

|           |          |             |            |                |          |
|-----------|----------|-------------|------------|----------------|----------|
| C11B-C12B | 1.397(3) | N1B-C7B-C6B | 130.0(2)   | C13-C12-C11    | 120.5(3) |
| C20B-C19B | 1.404(3) | C6B-C7B-C2B | 122.1(2)   | C14-C15-C16    | 120.4(3) |
| C11-C16   | 1.392(4) | O1-C9-C8    | 121.3(2)   | N4B-C22B-C23B  | 109.0(2) |
| C11-C12   | 1.394(3) | O1-C9-C10   | 123.9(2)   | N4B-C22B-C24B  | 110.8(2) |
| C22-C24   | 1.528(4) | C8-C9-C10   | 114.75(19) | C23B-C22B-C24B | 111.8(2) |
| C22-C23   | 1.517(3) | N1-C7-C2    | 107.8(2)   | C14B-C15B-C16B | 120.2(2) |
| C4B-C5B   | 1.411(4) | N1-C7-C6    | 129.7(2)   | C13-C14-C15    | 119.5(3) |
| C6-C5     | 1.389(3) | C6-C7-C2    | 122.4(2)   | C14-C13-C12    | 120.5(3) |
| C3-C4     | 1.369(4) | O1B-C9B-C8B | 121.1(2)   |                |          |

## References

- [1] X. Zhou, Z. Fan, Z. Zhang, P. Lu, Y. Wang, *Org. Lett.* **2016**, *18*, 4706.
- [2] W. Liu, S. C. Richter, Y. Zhang, L. Ackermann, *Angew. Chem. Int. Ed.* **2016**, *55*, 7747.
- [3] Agilent Technologies, CrysAlisPRO, Version 1.171.36.28, **2013**.
- [4] Dolomanov, O. V.; Bourhis, L. J.; Gildea, R. J. *J. Appl. Cryst.* **2009**, *42*, 339.
- [5] Kratzert, D.; Holstein, J. J.; Krossing, I. *J. Appl. Crystallogr.* **2015**, *48*, 933.

# $^1\text{H}$ , $^{13}\text{C}$ and $^{19}\text{F}$ NMR Spectra

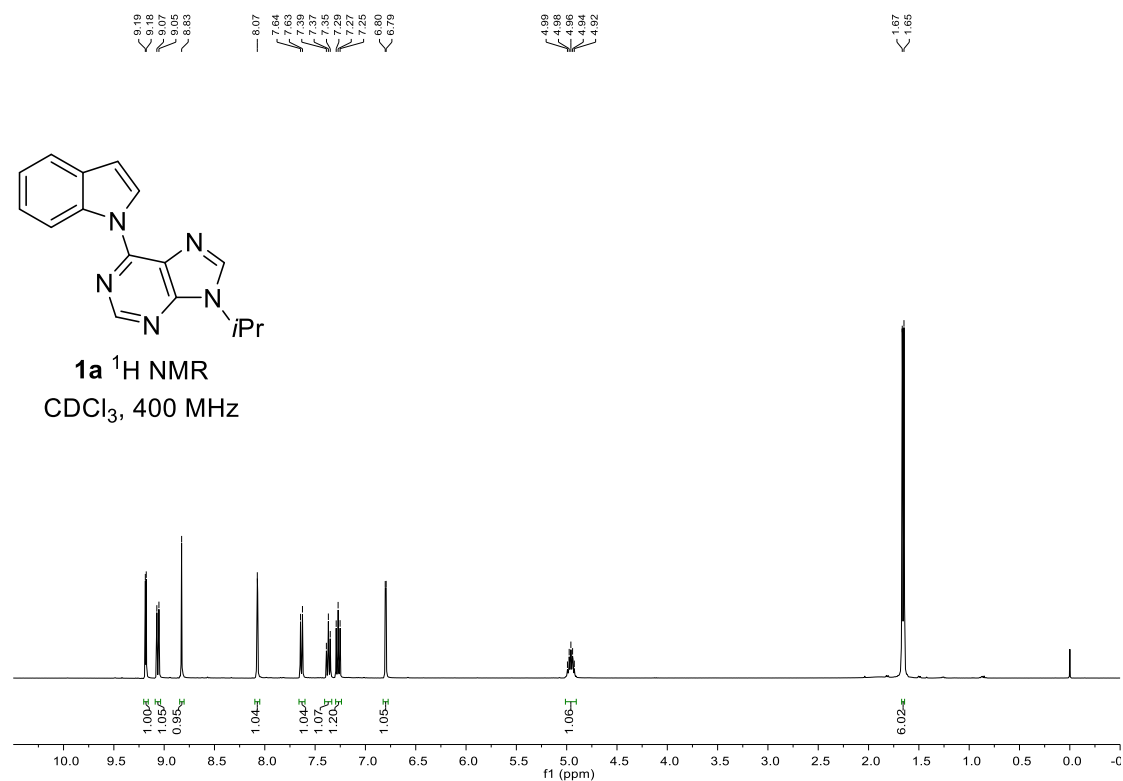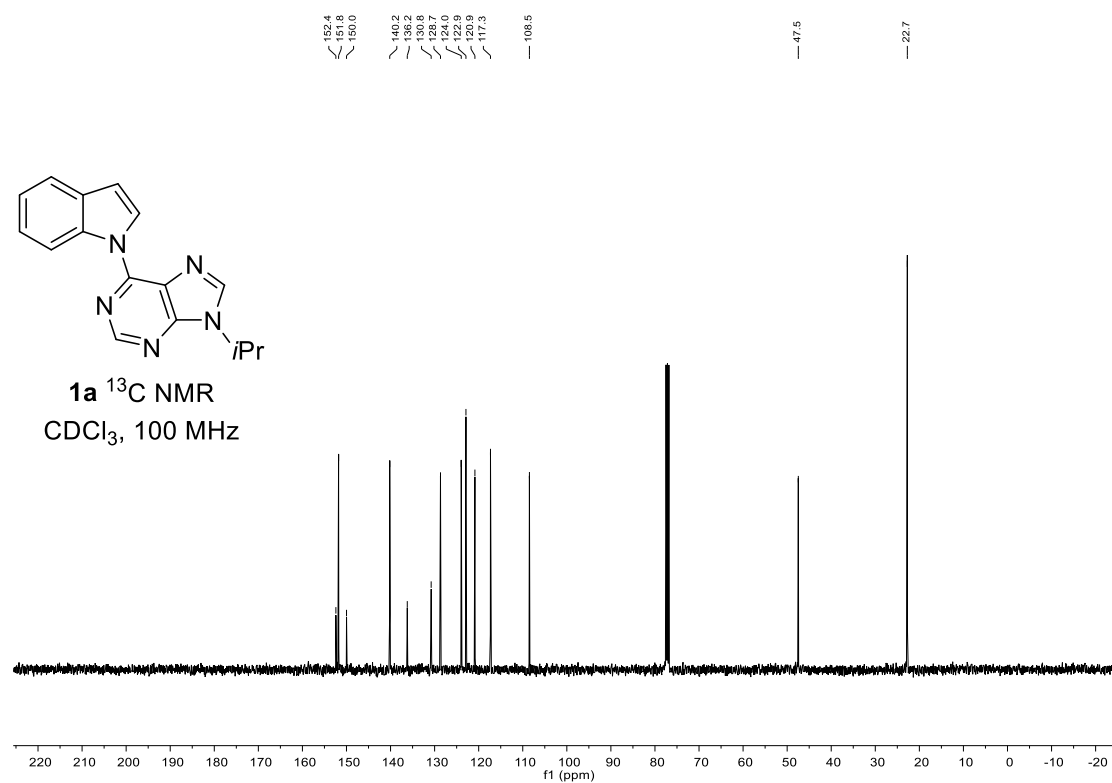



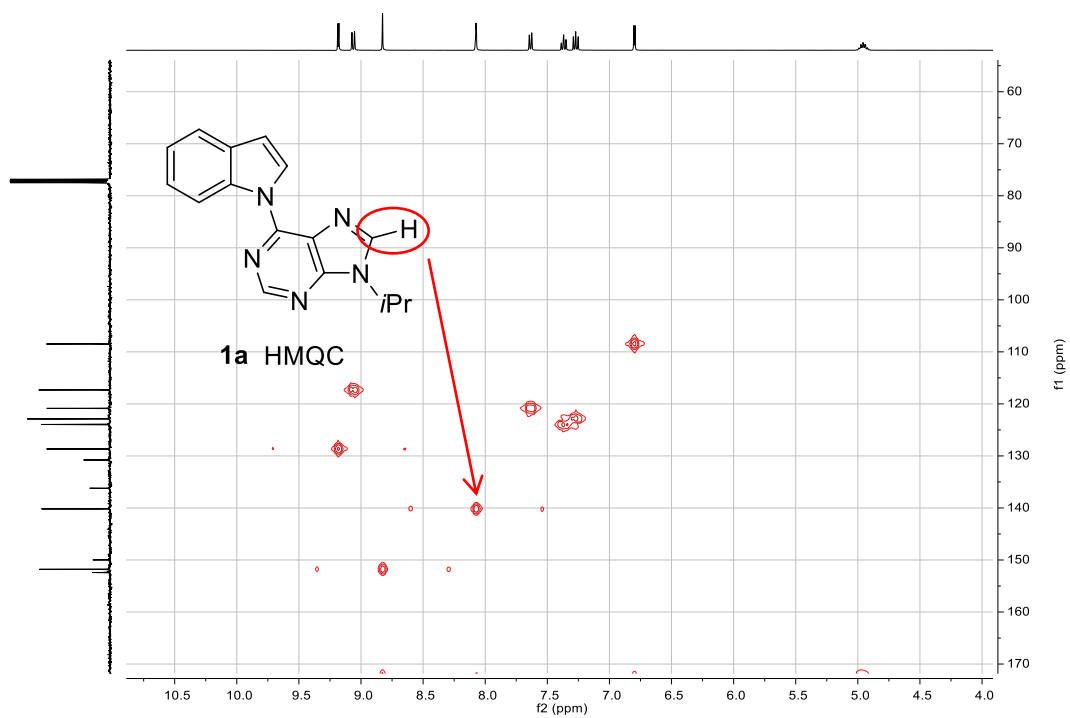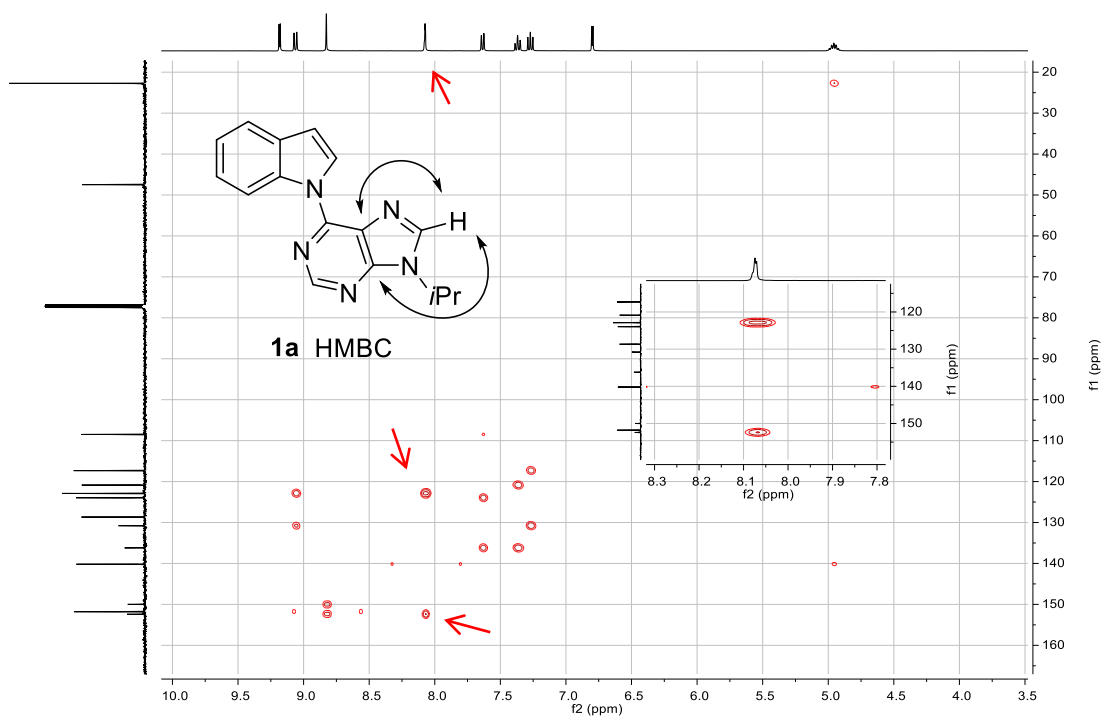

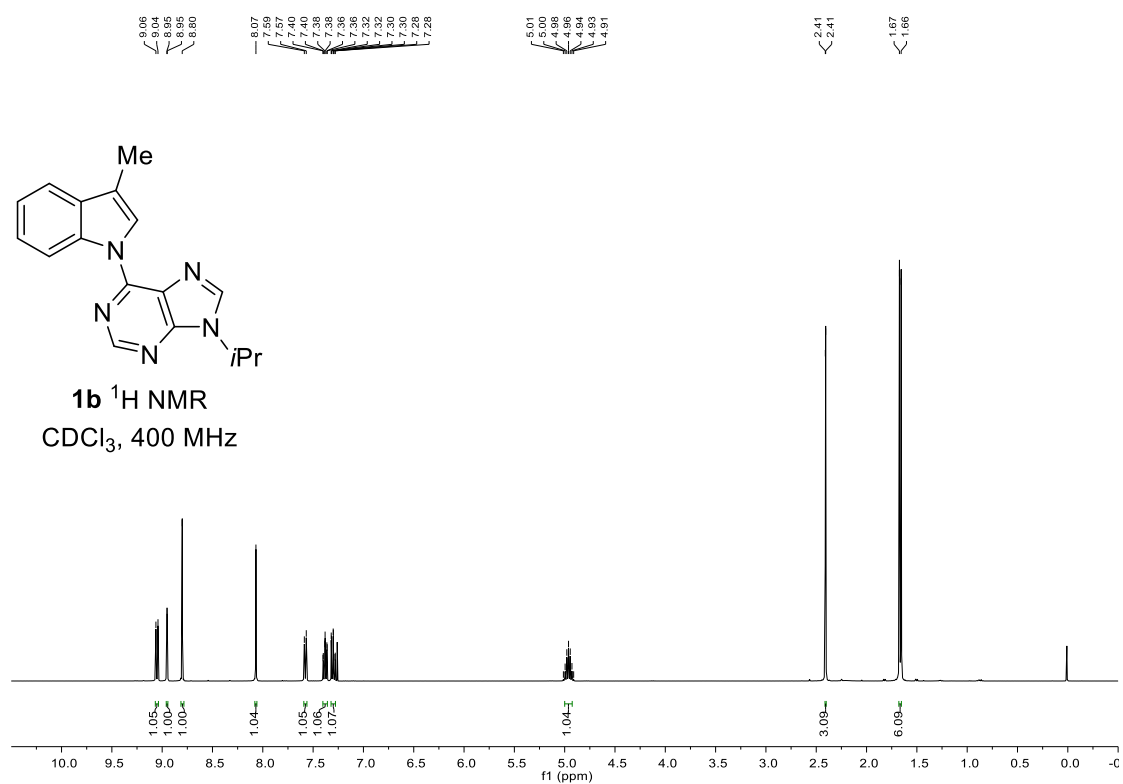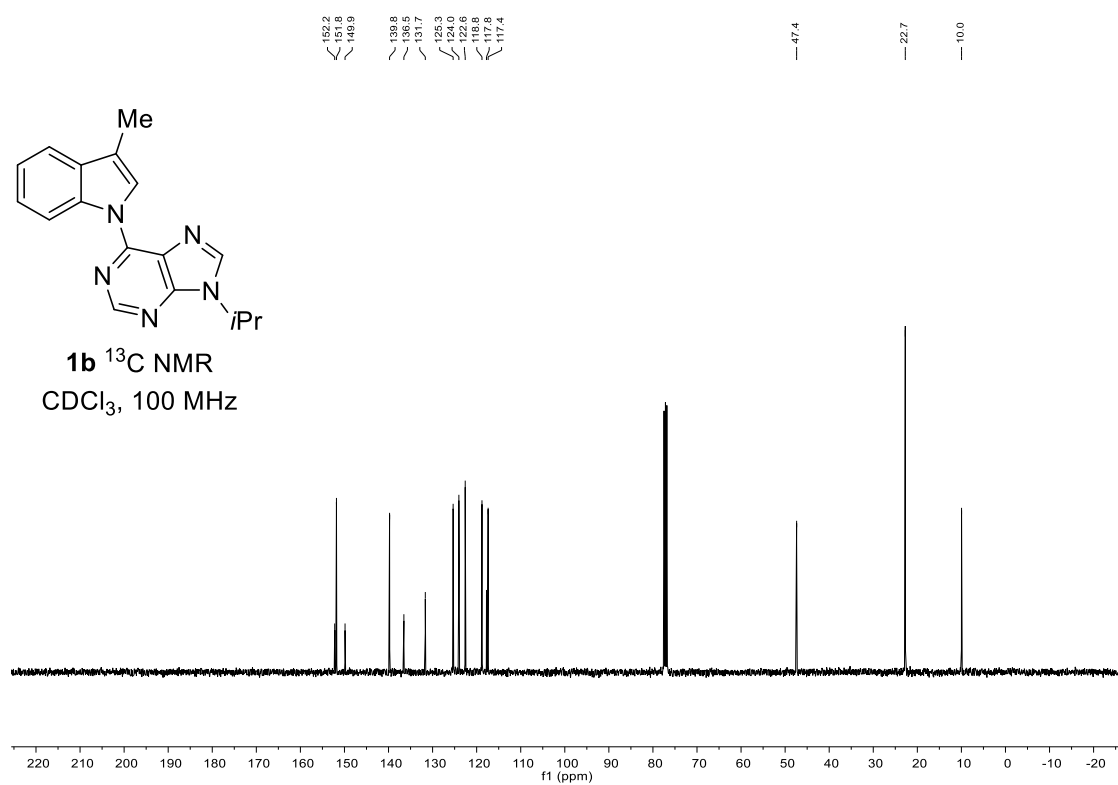

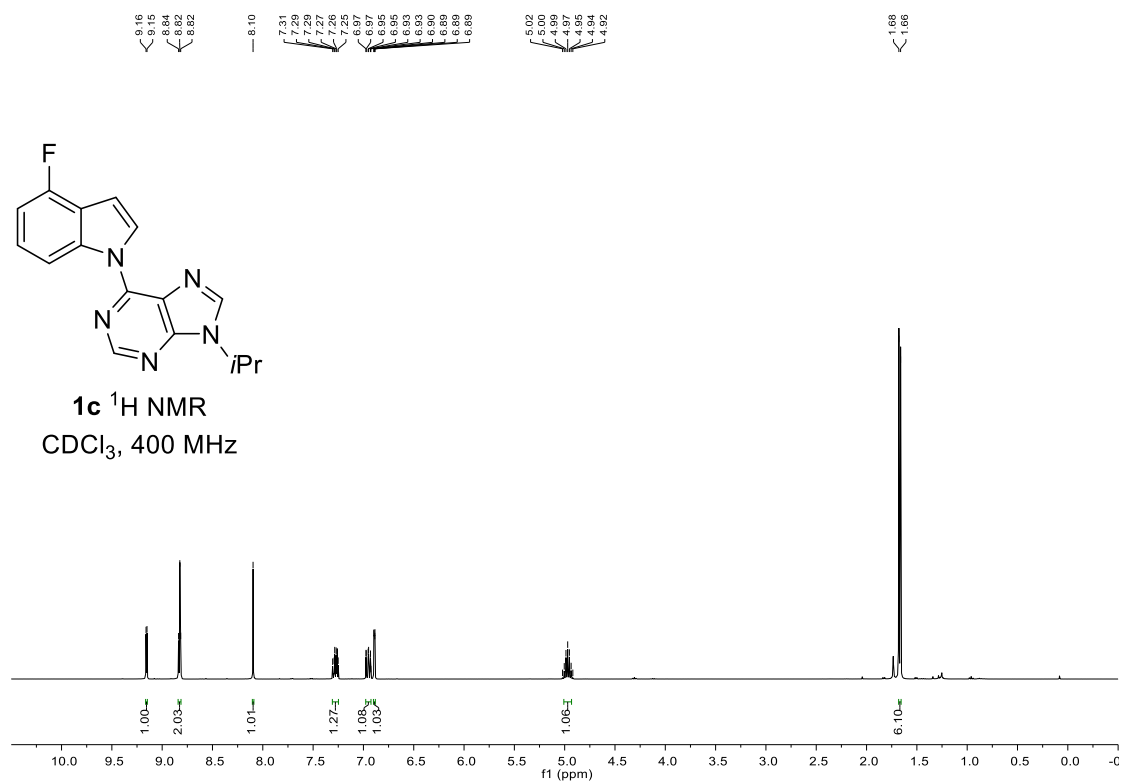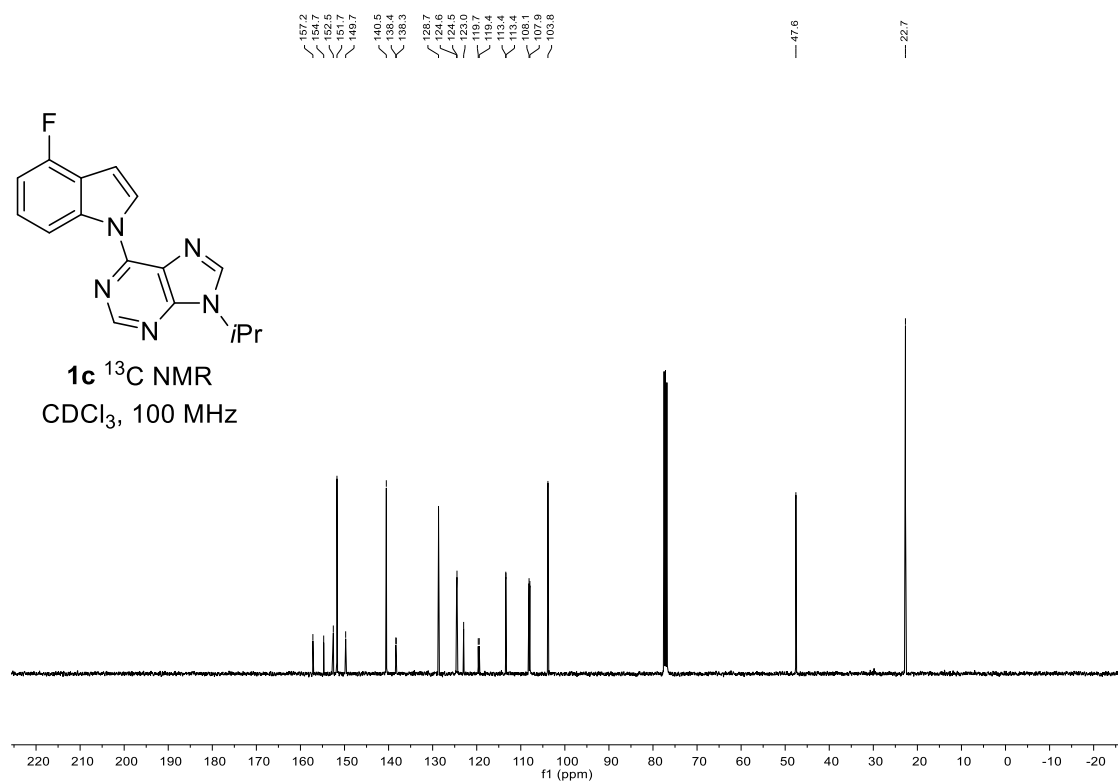

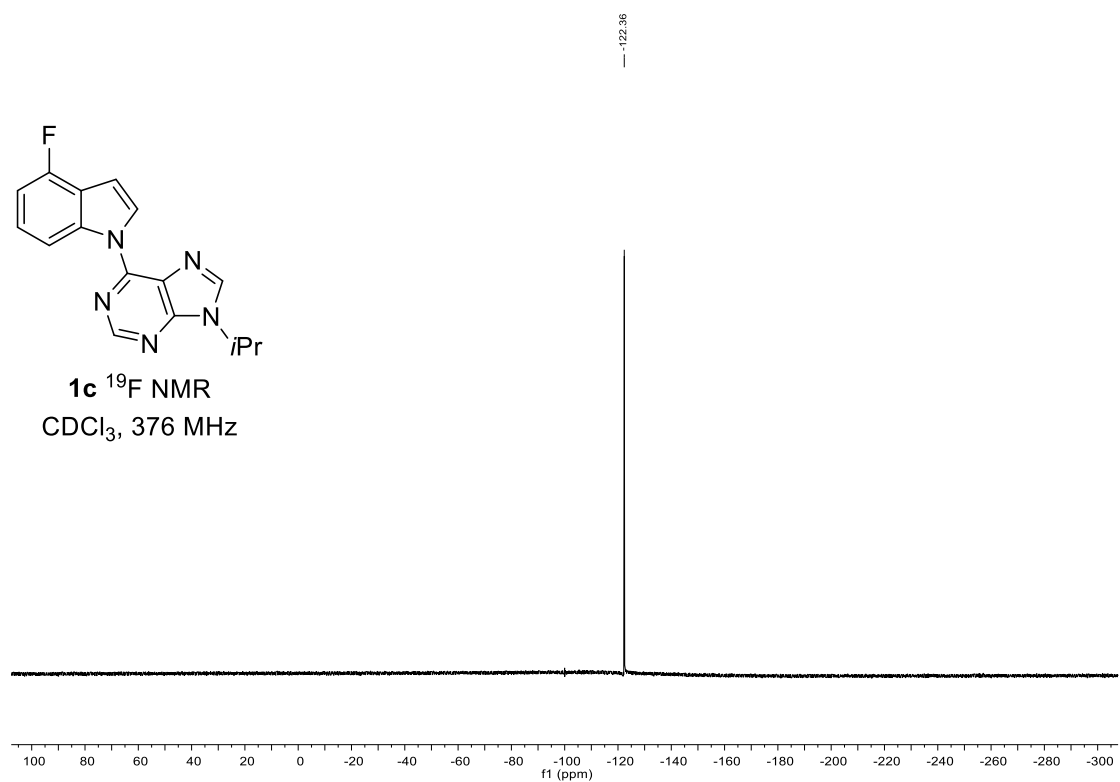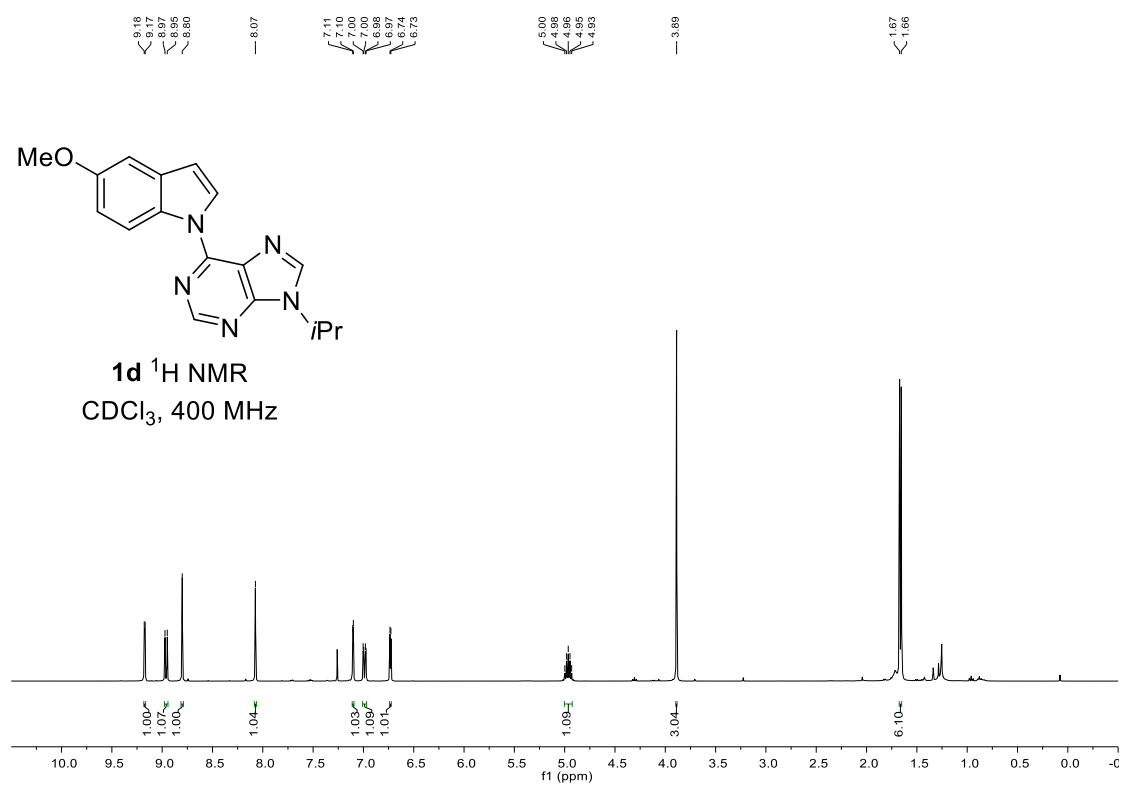

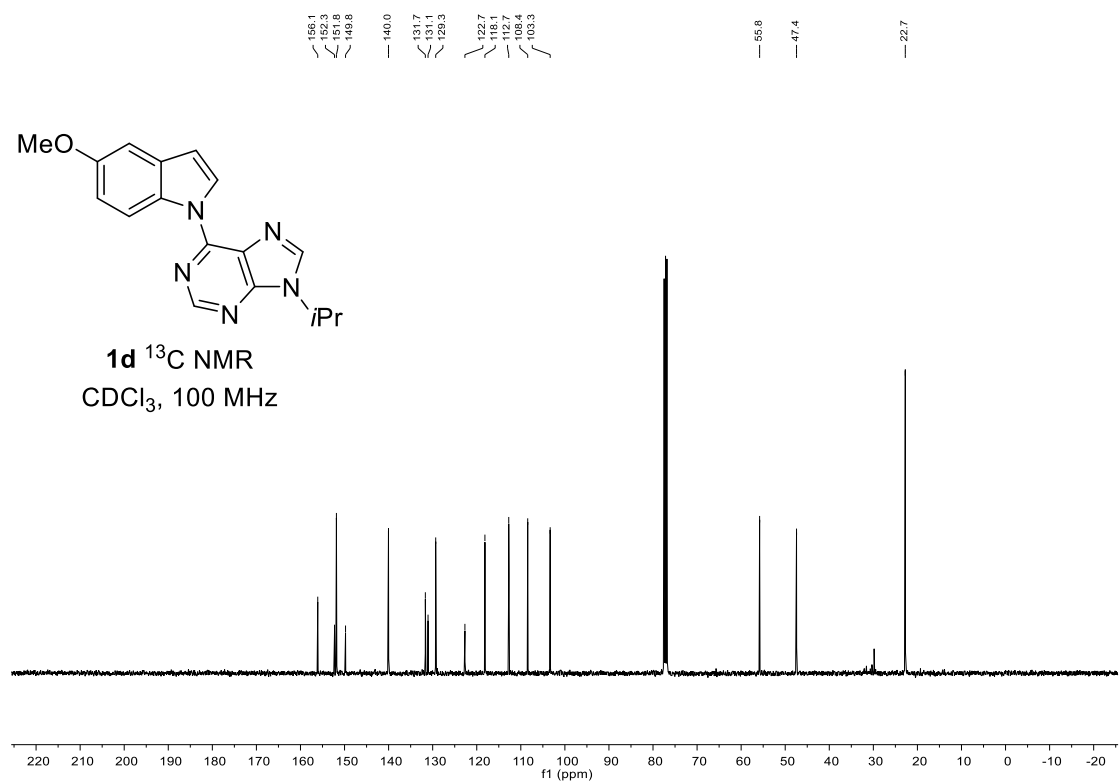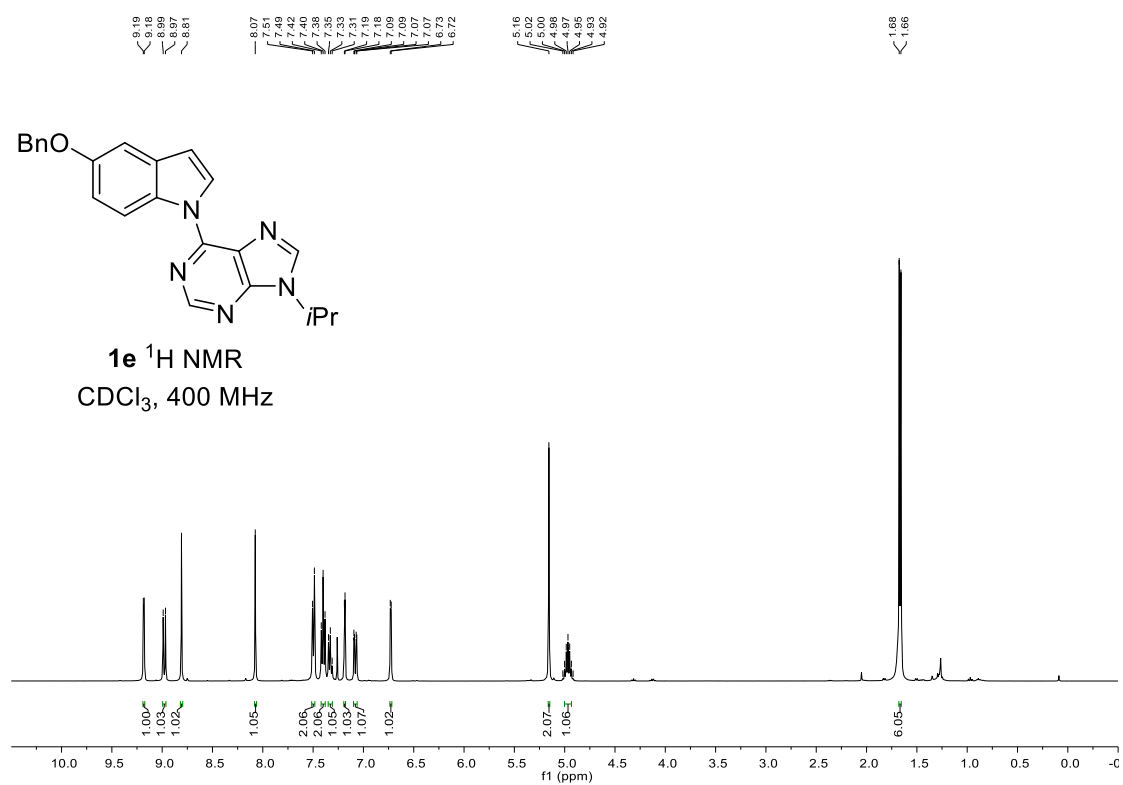

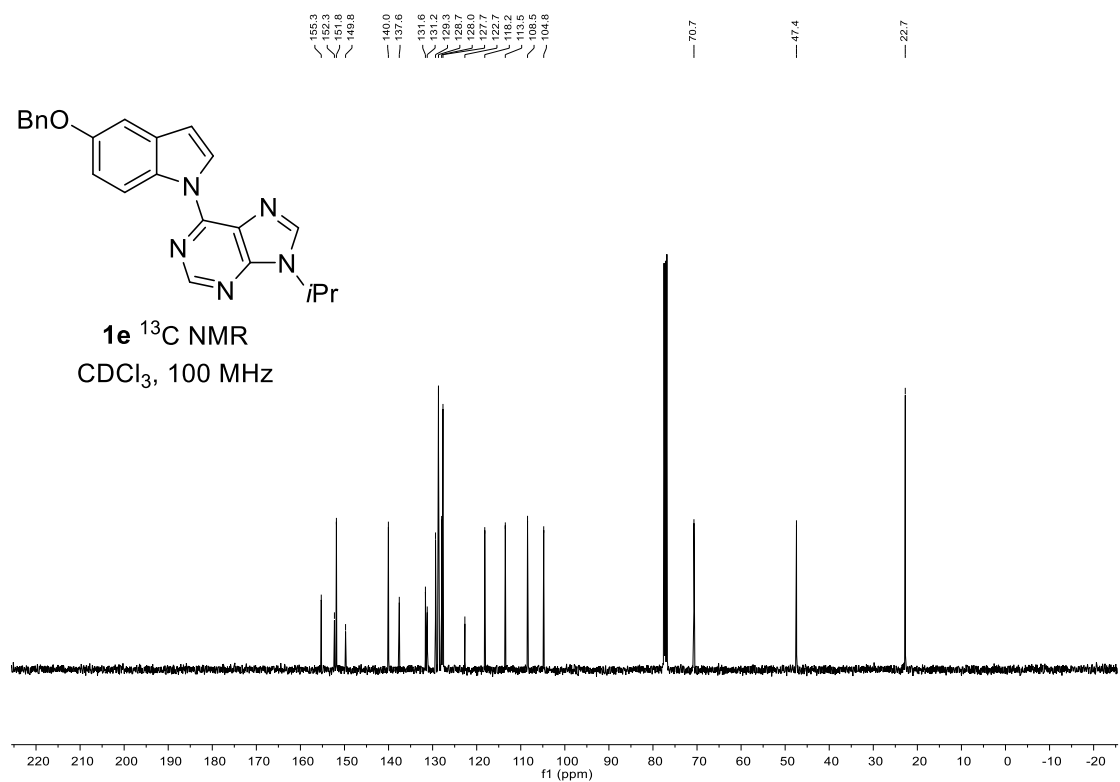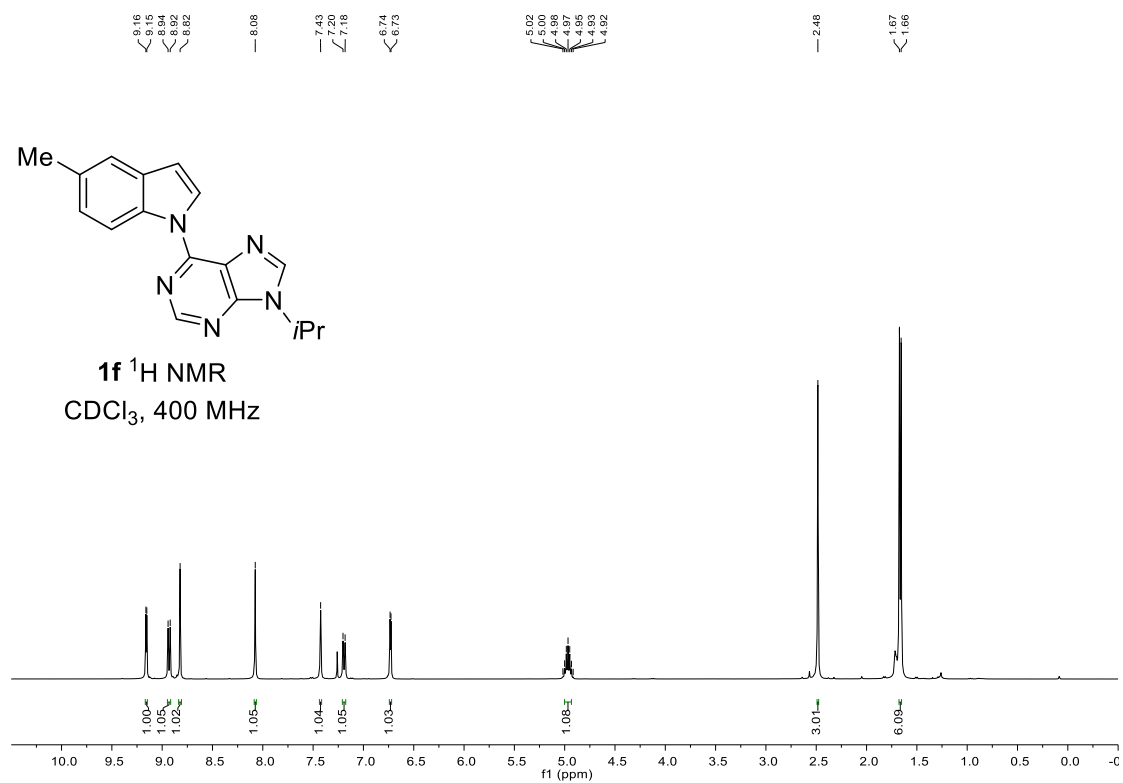

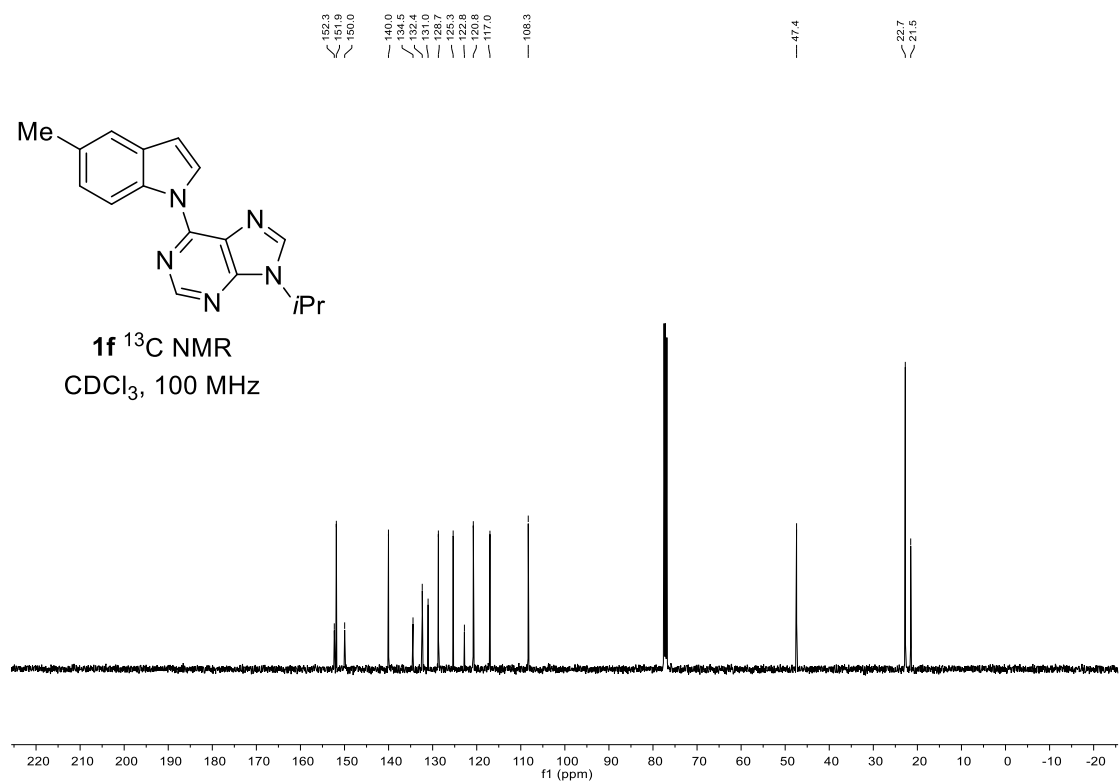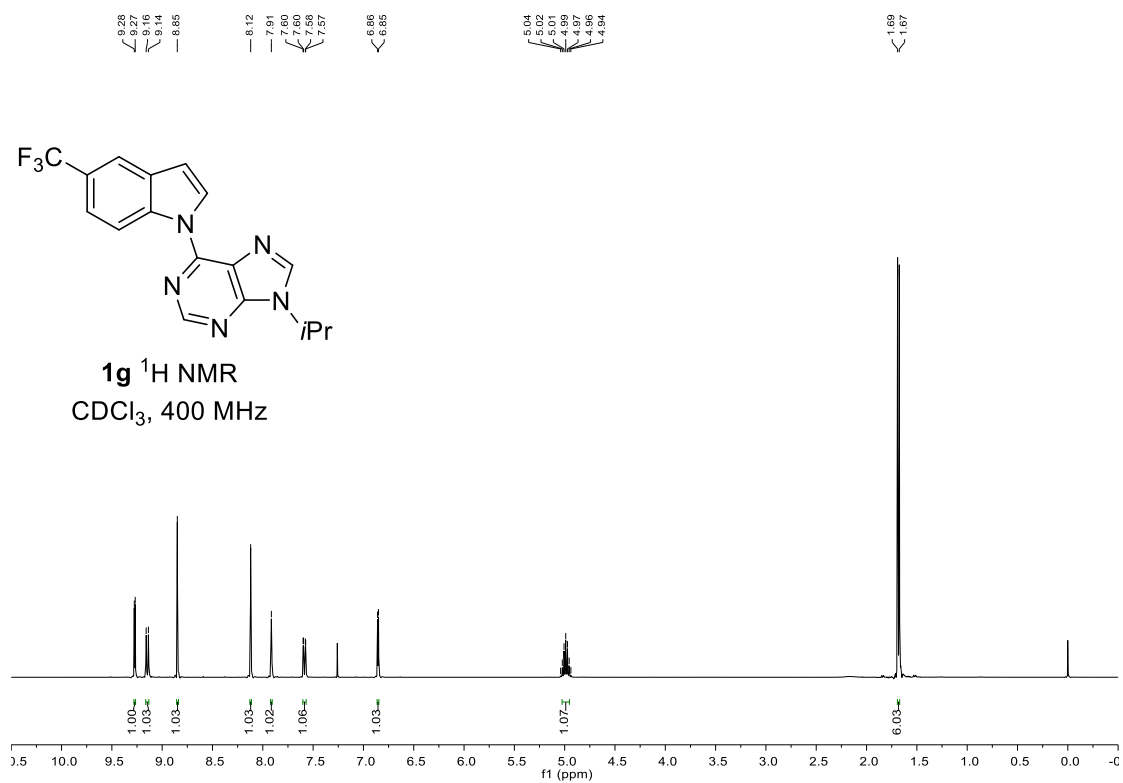

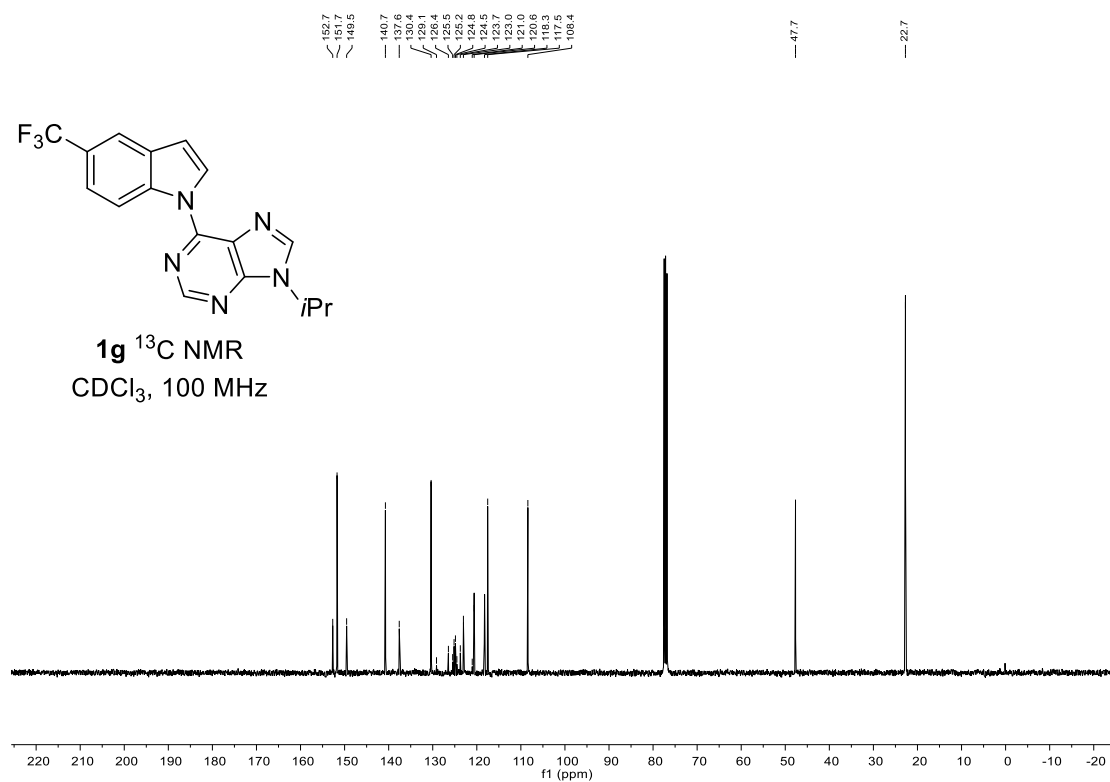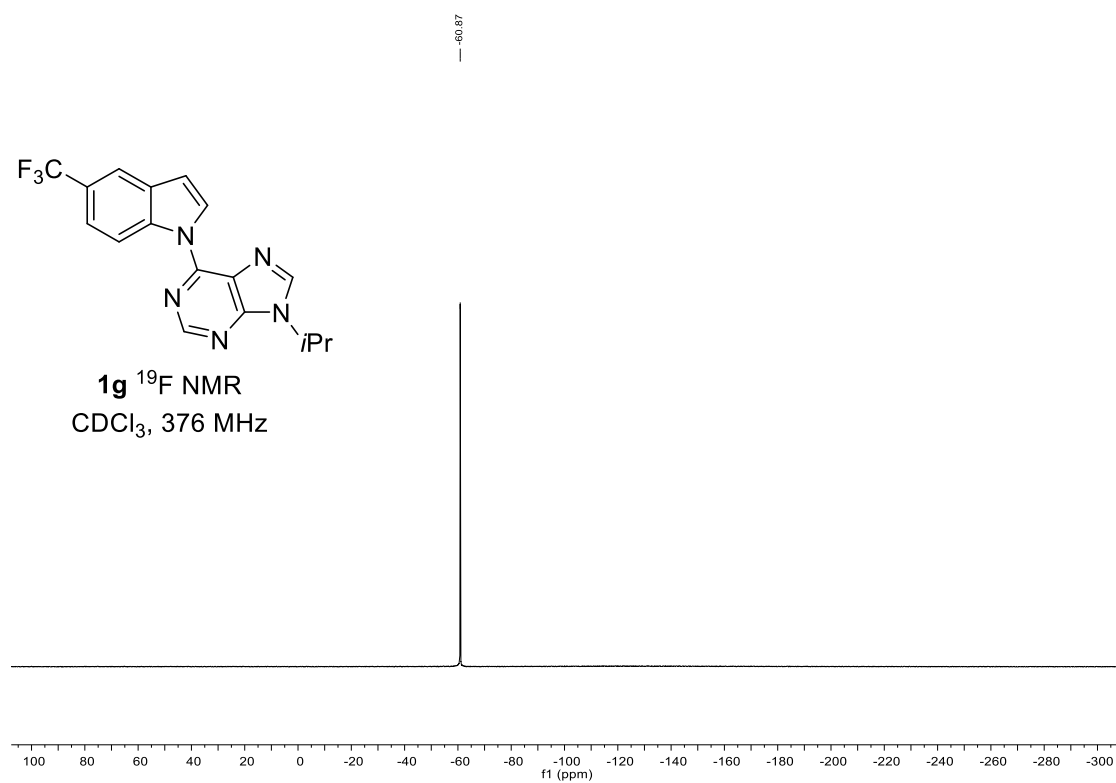



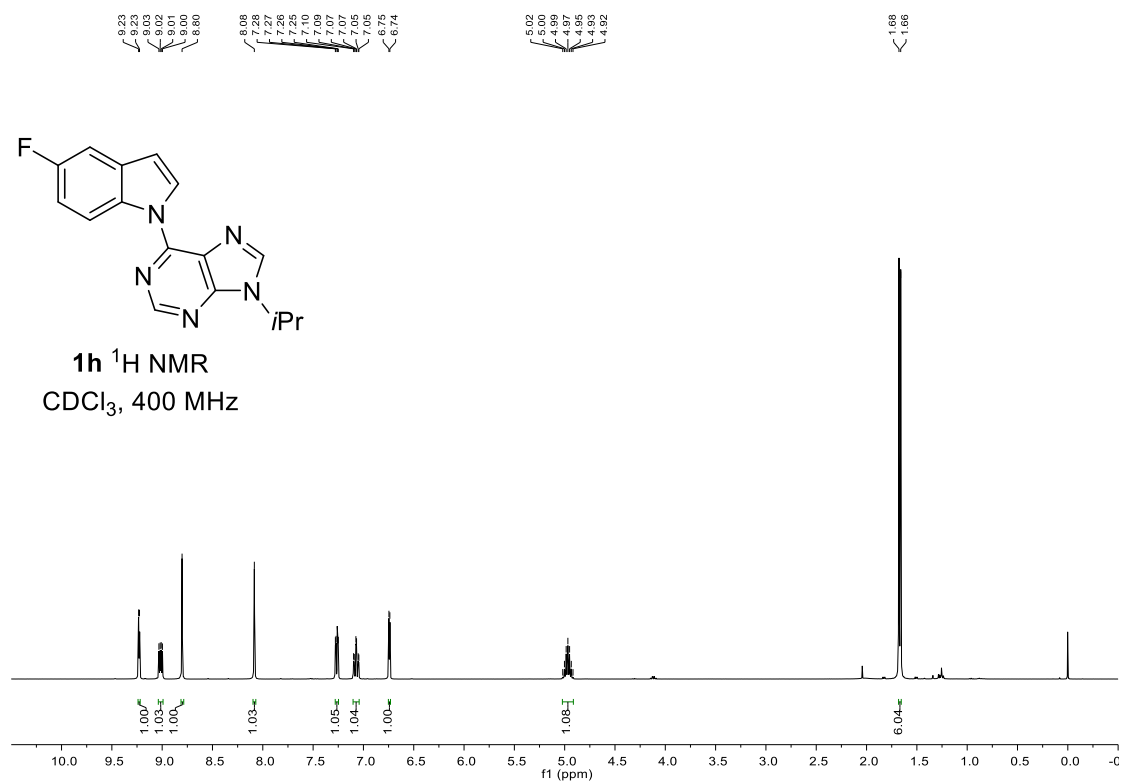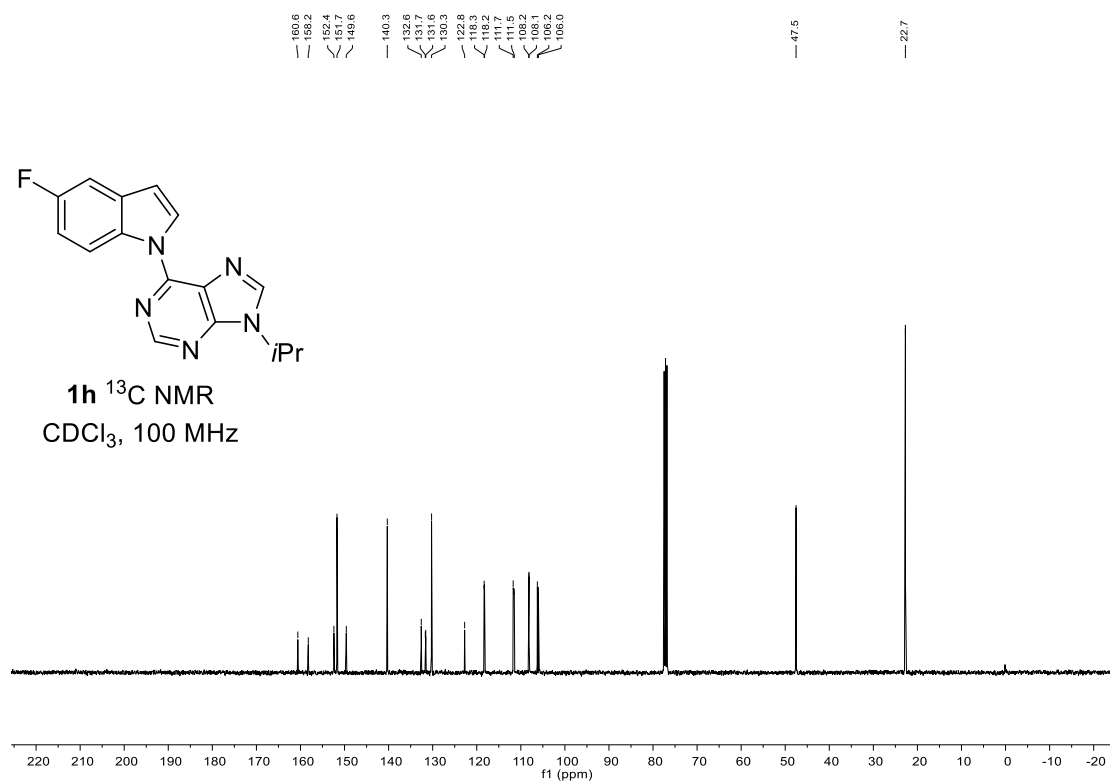

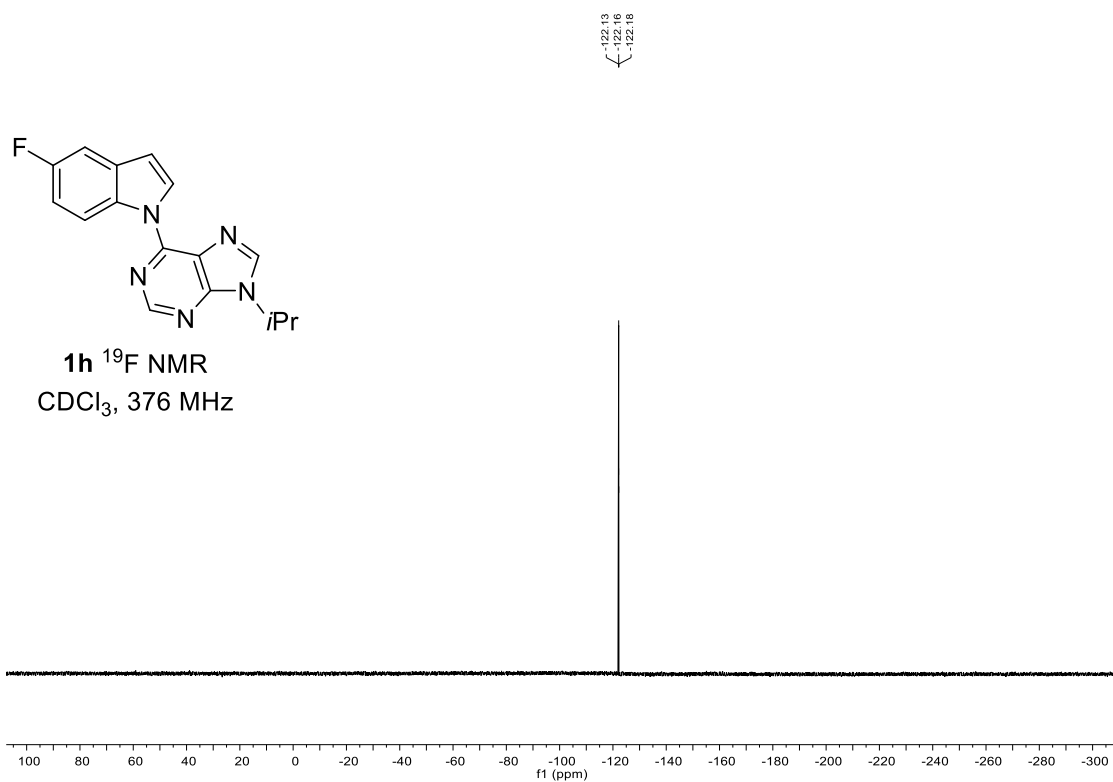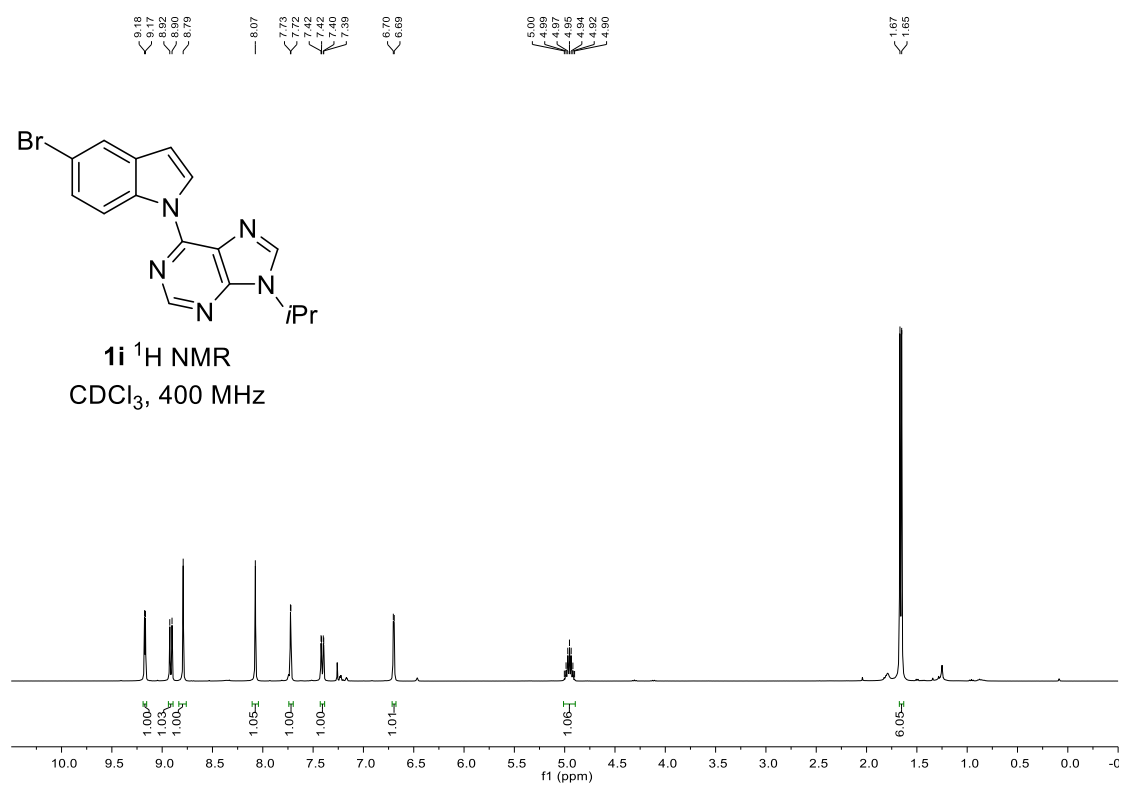

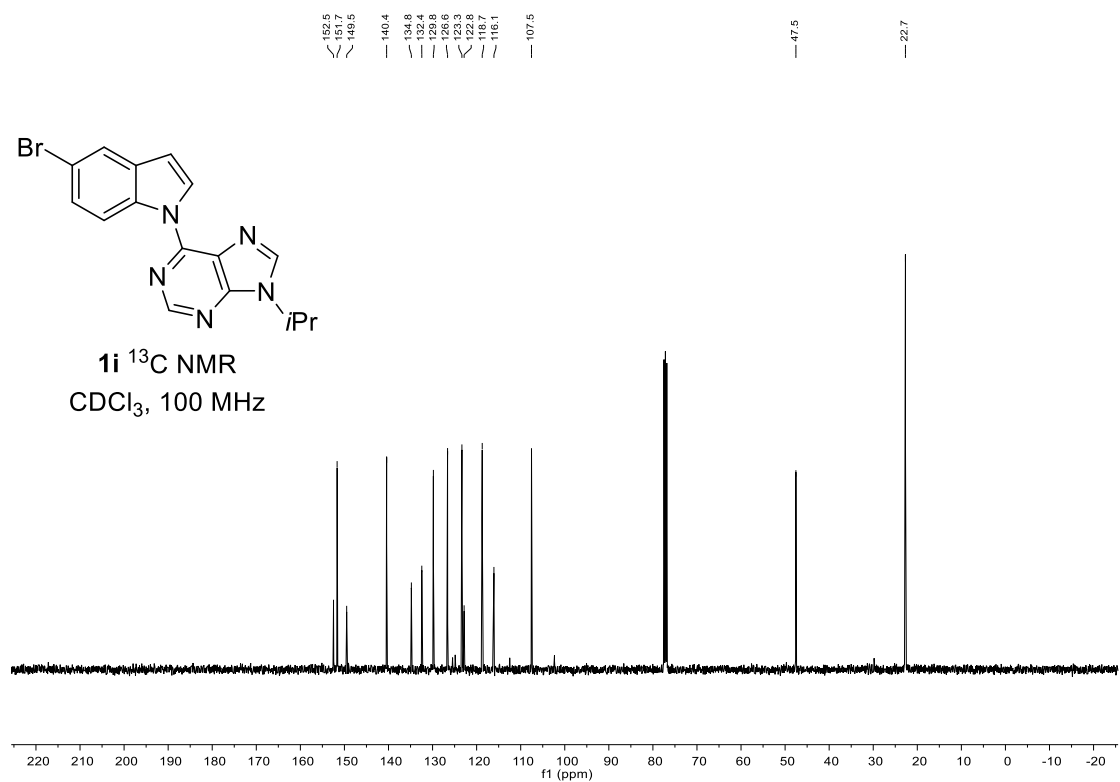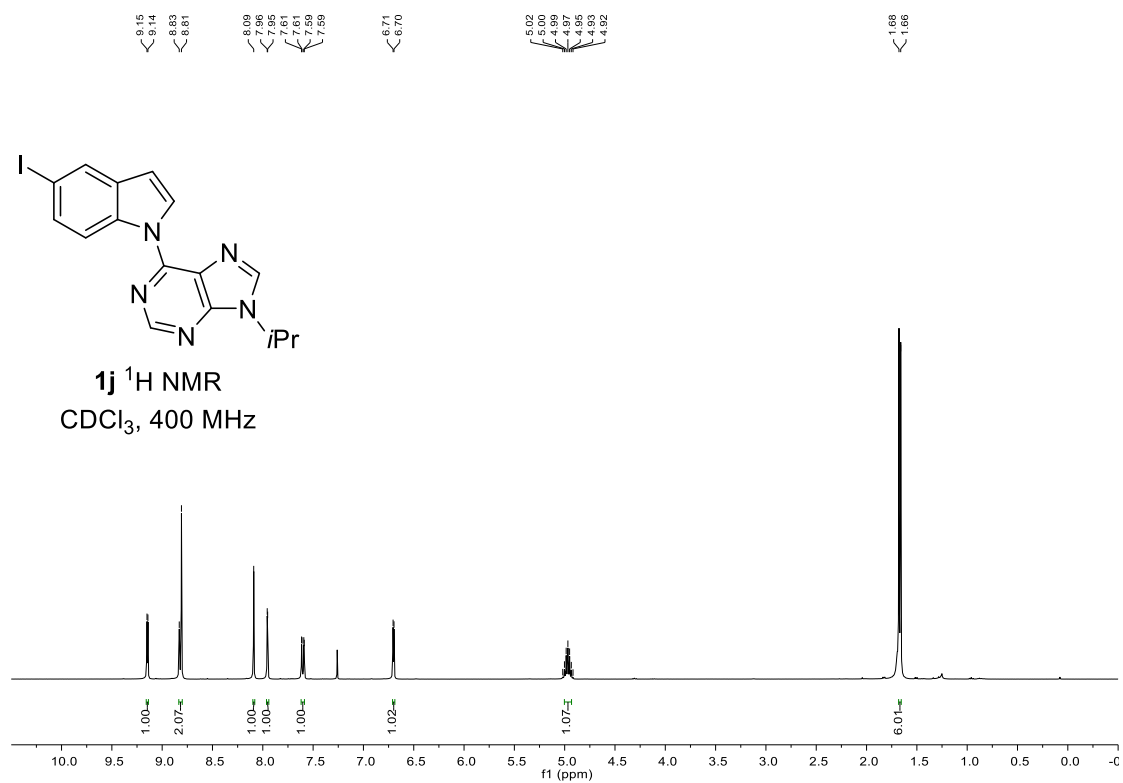

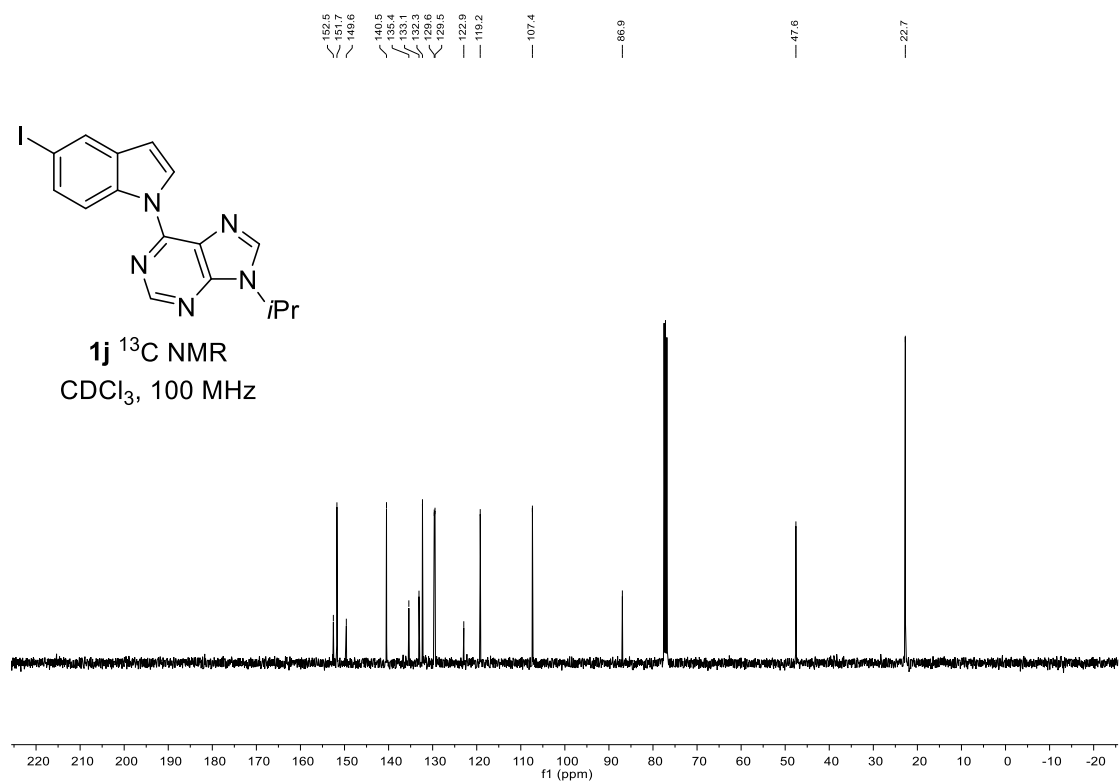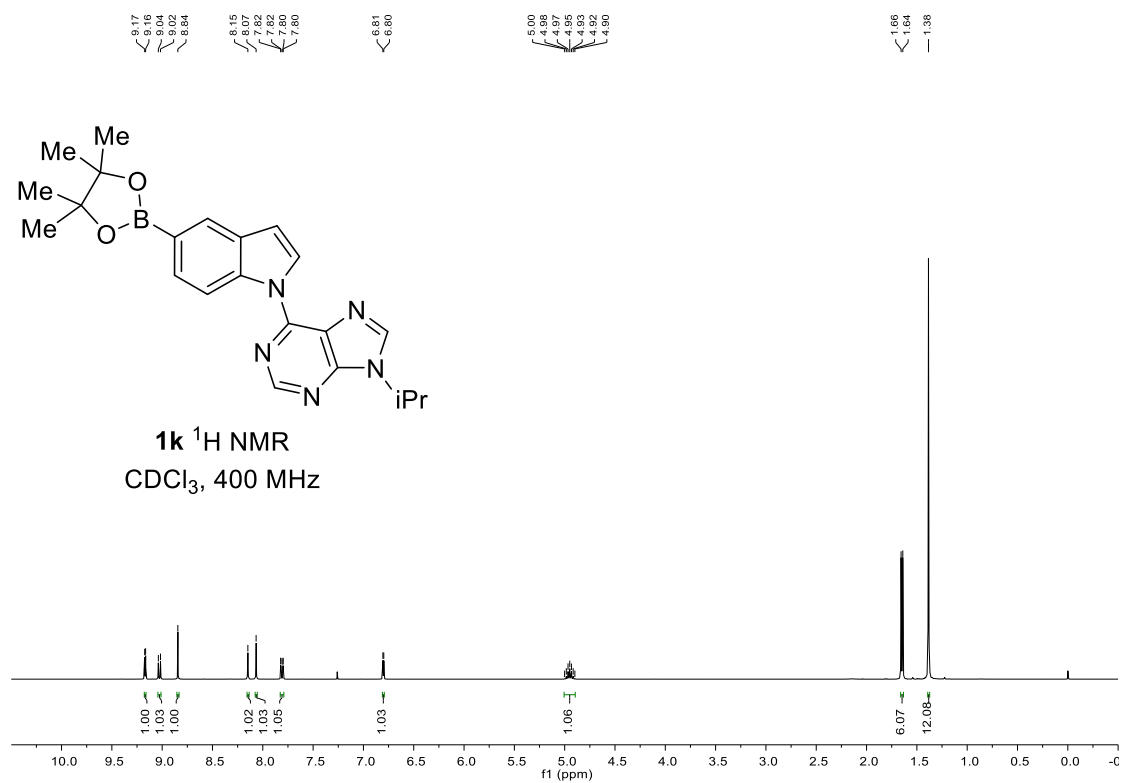

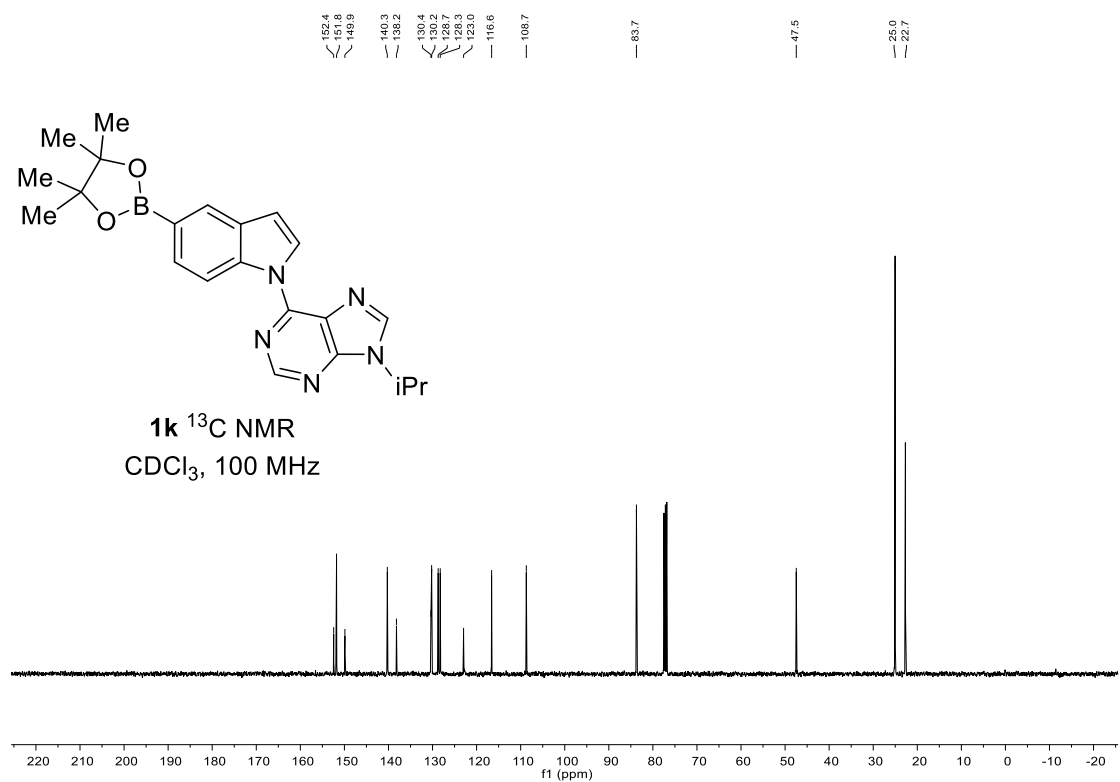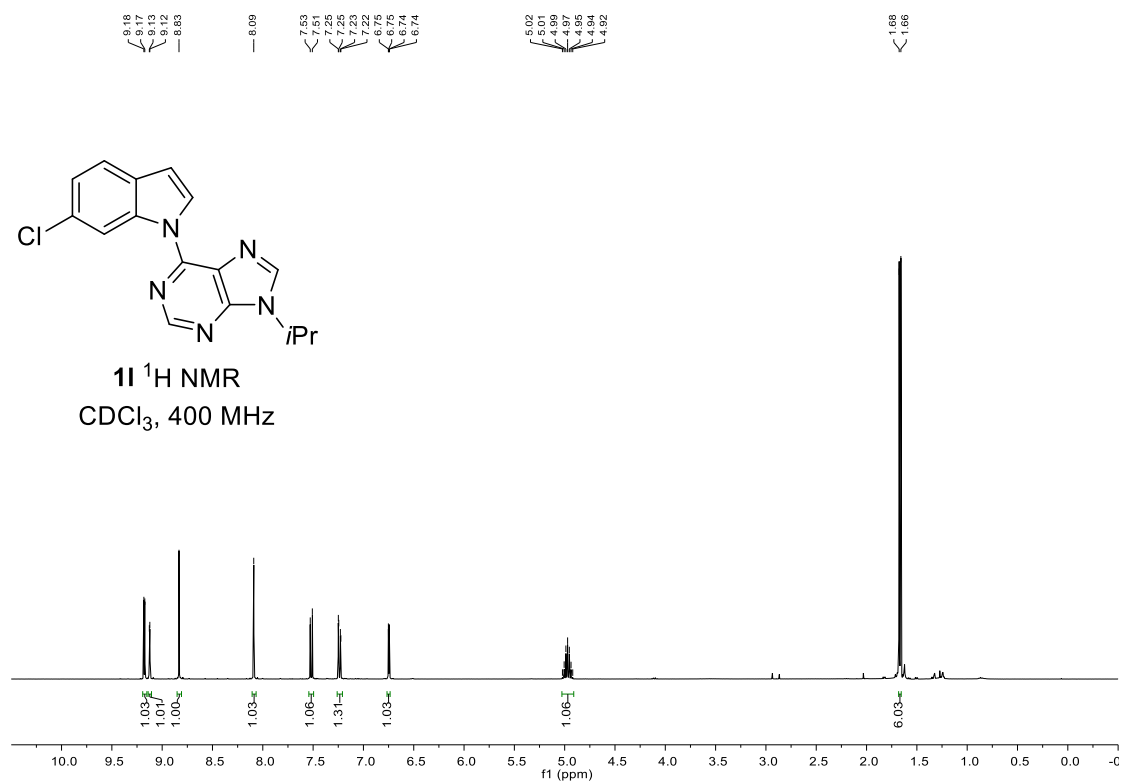

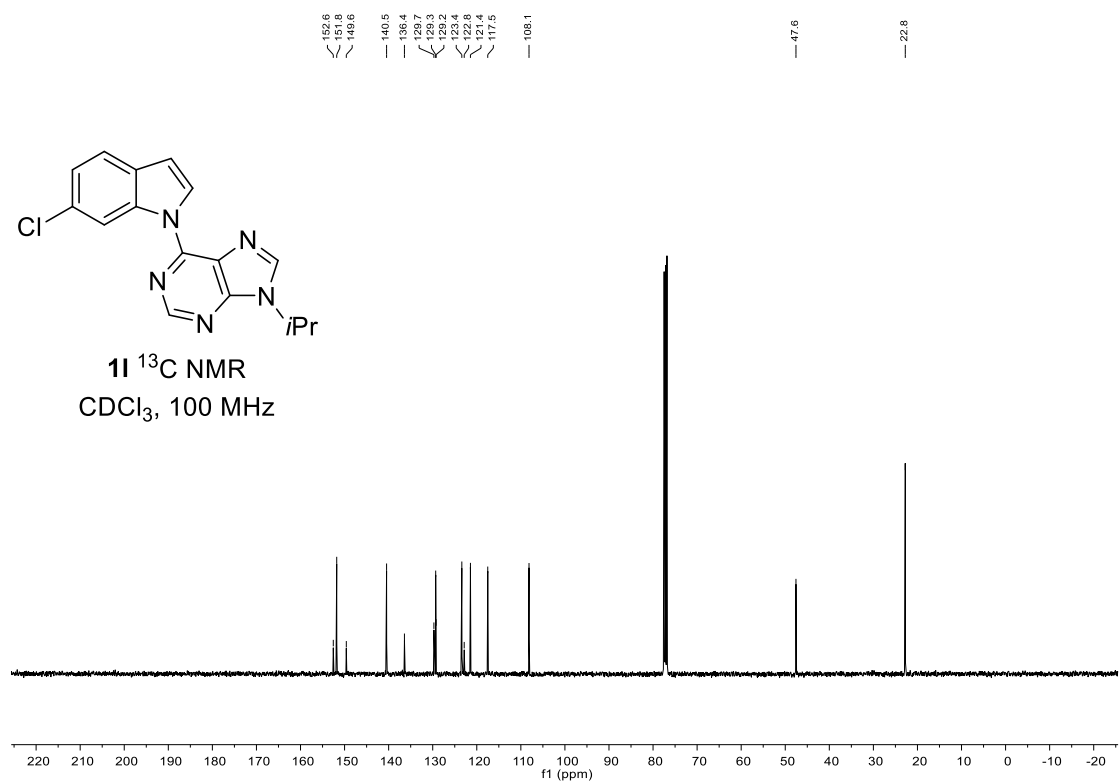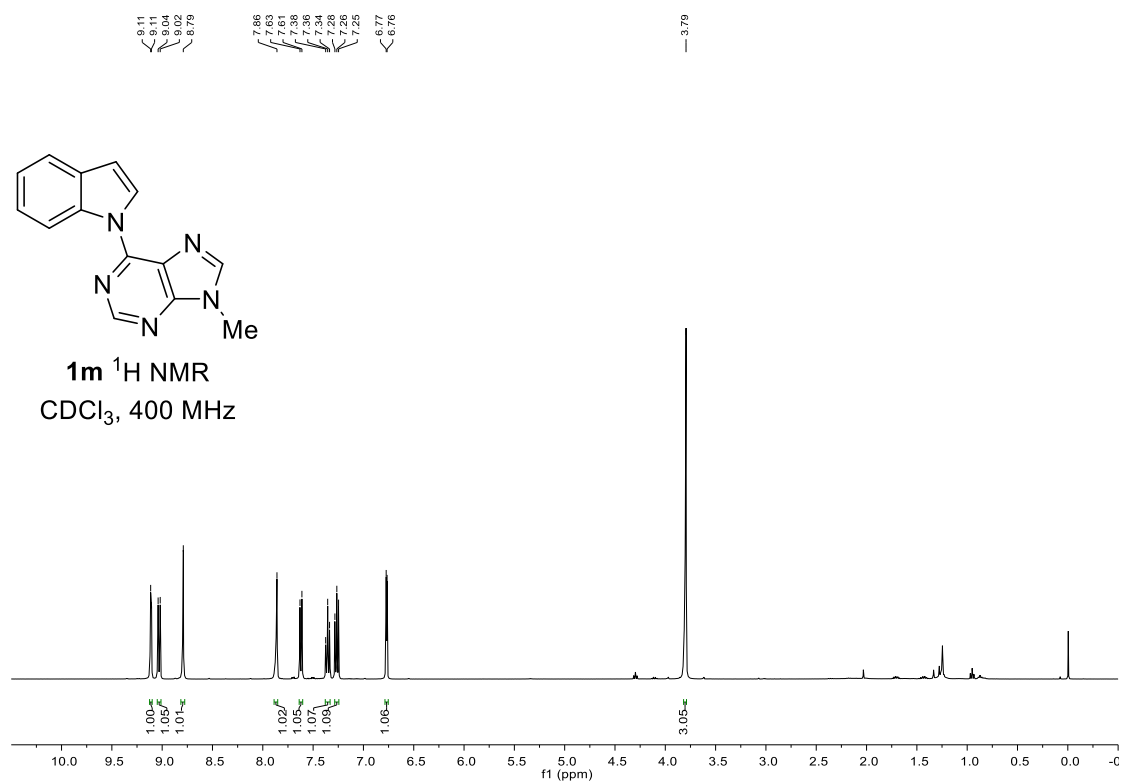

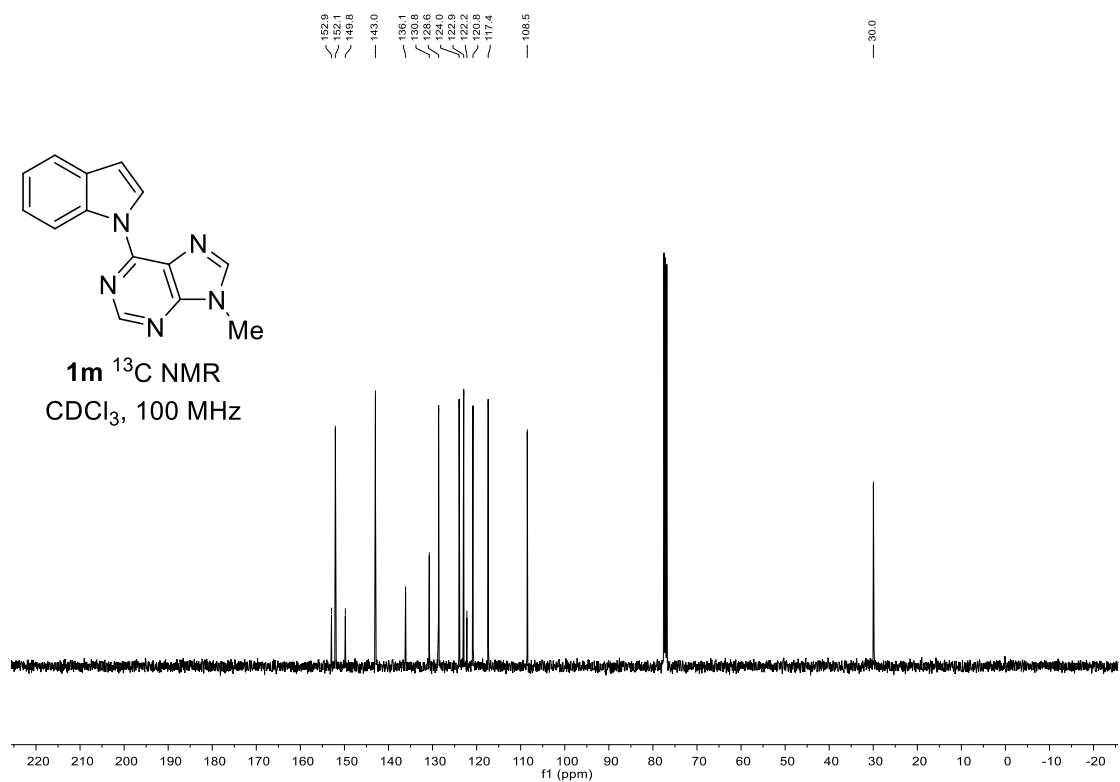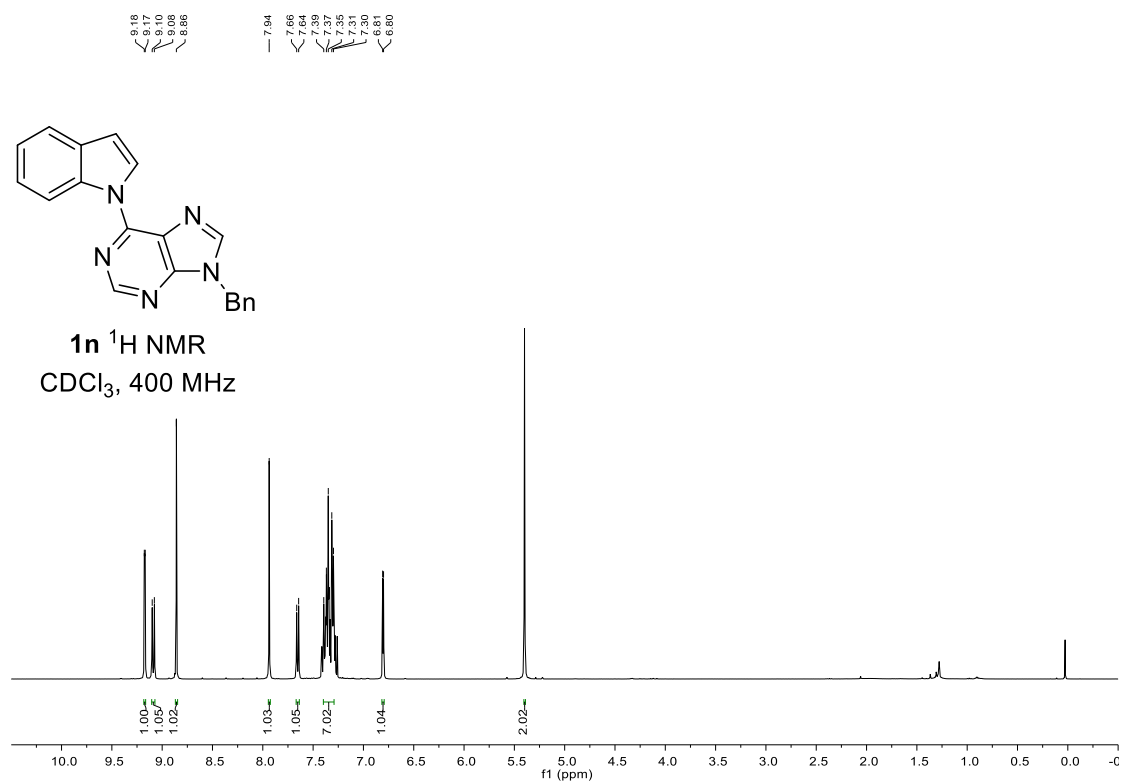

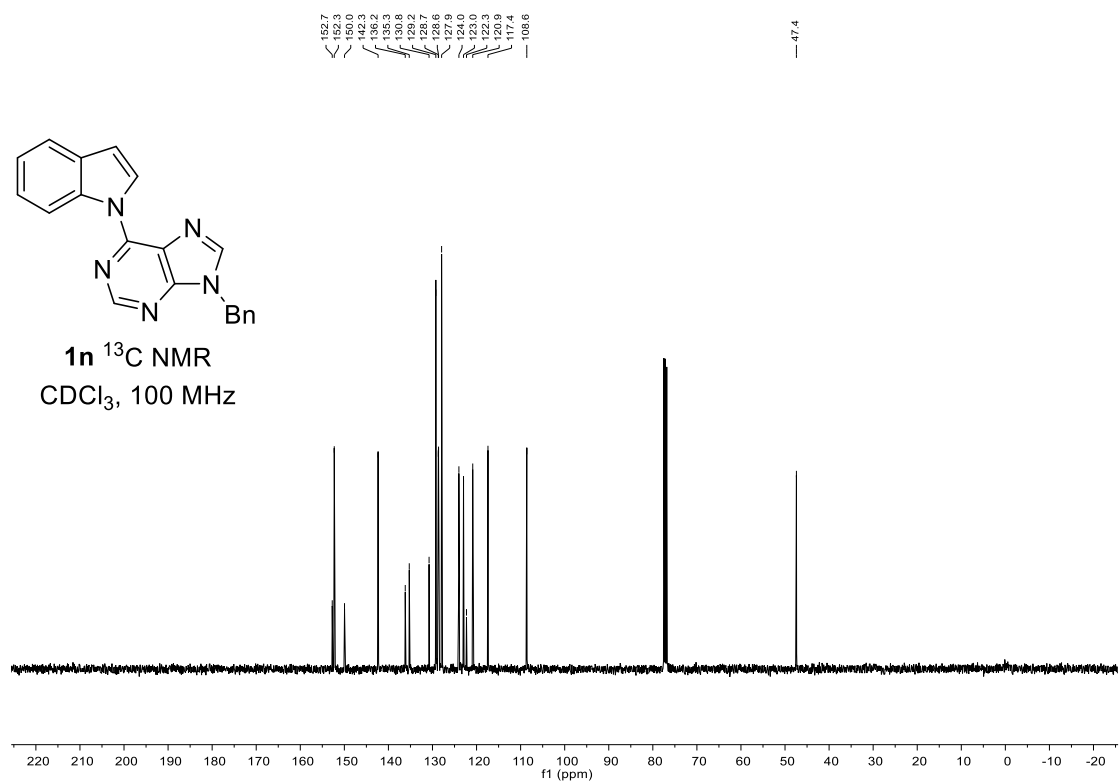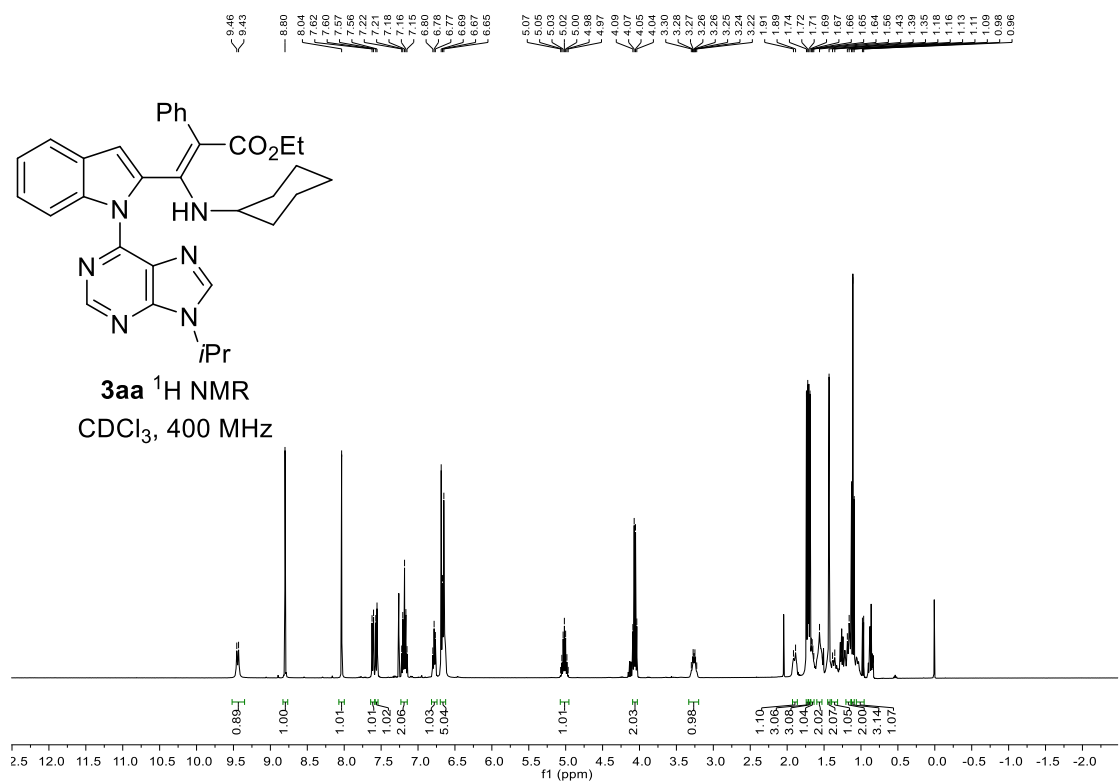



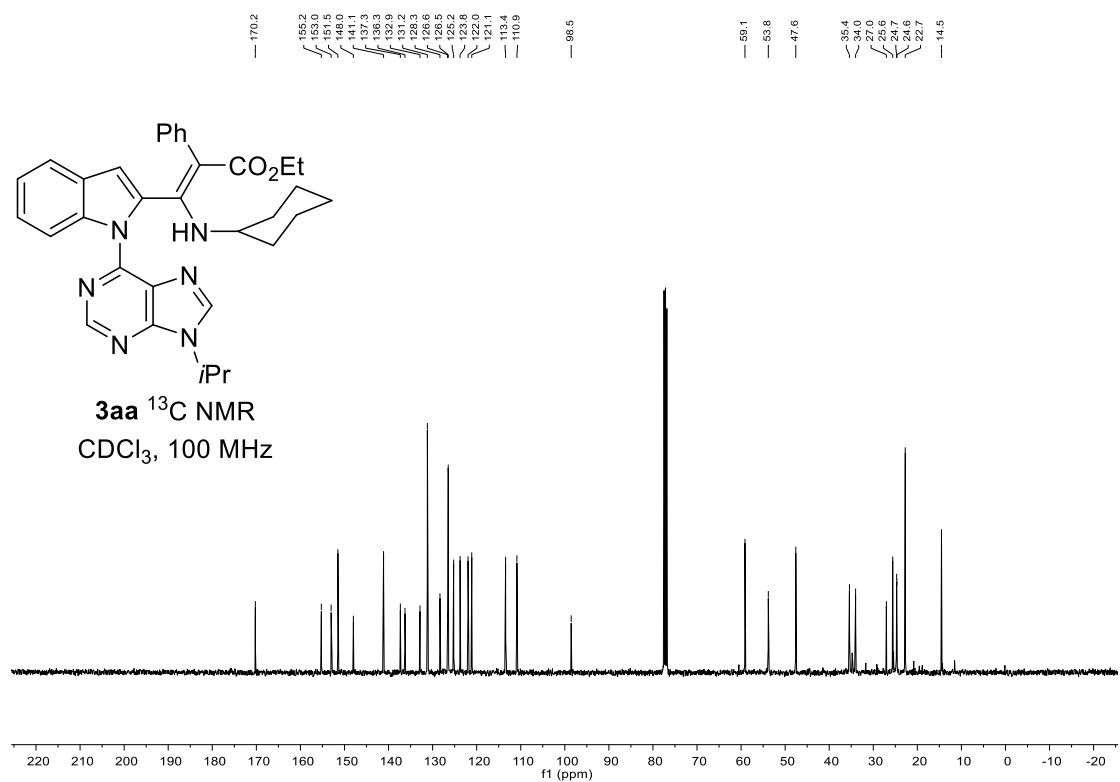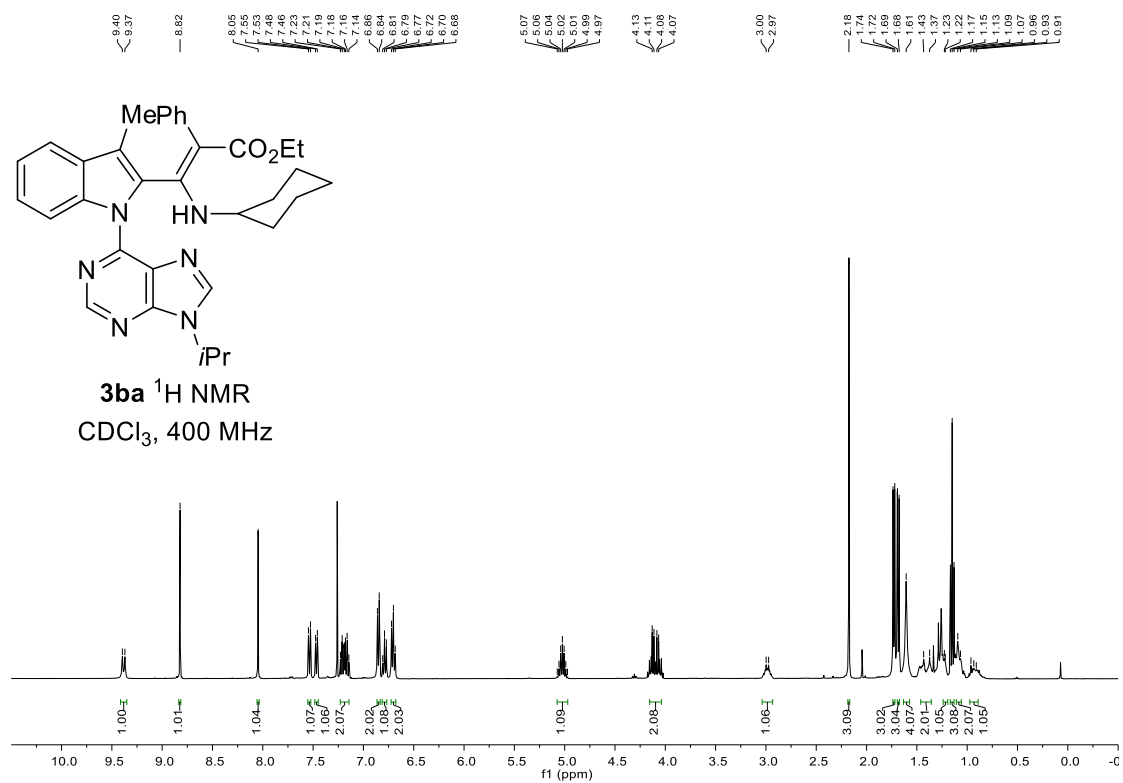

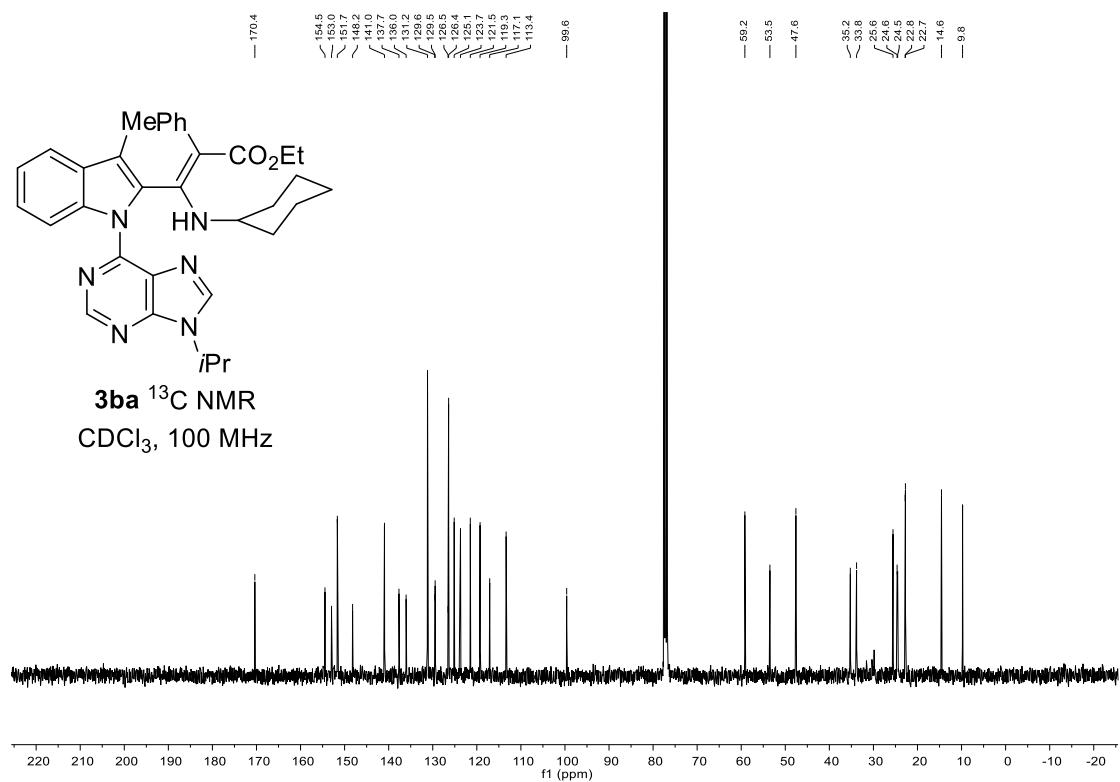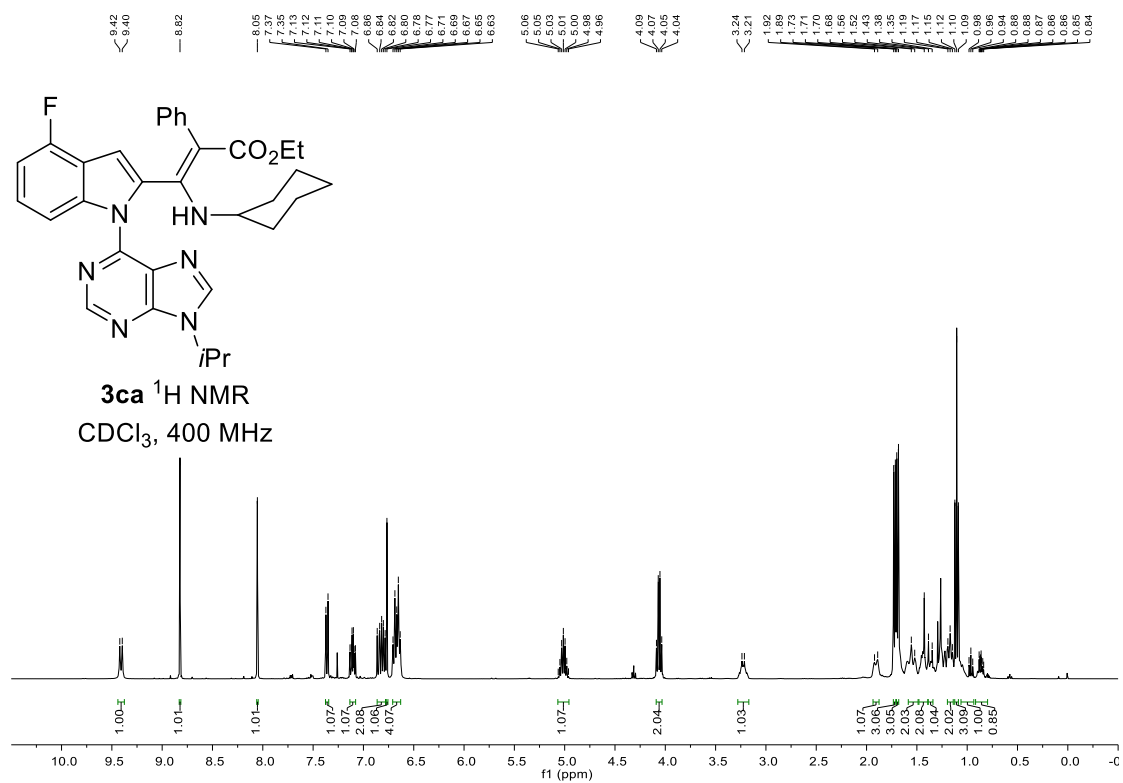

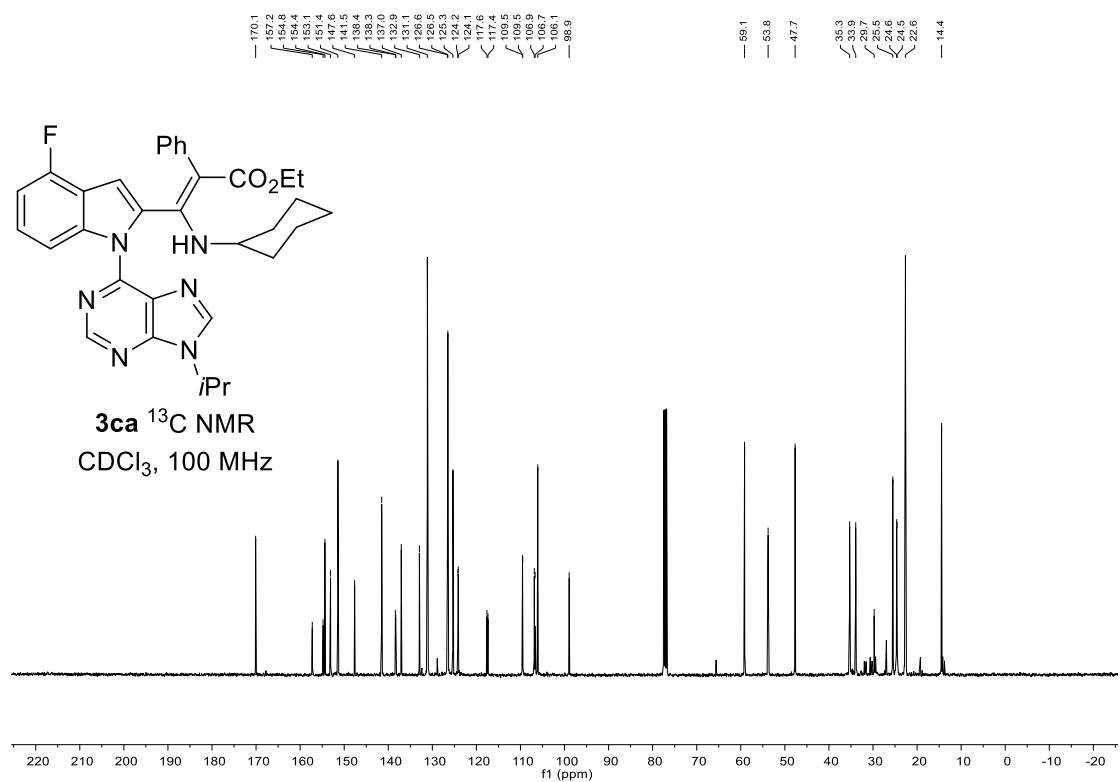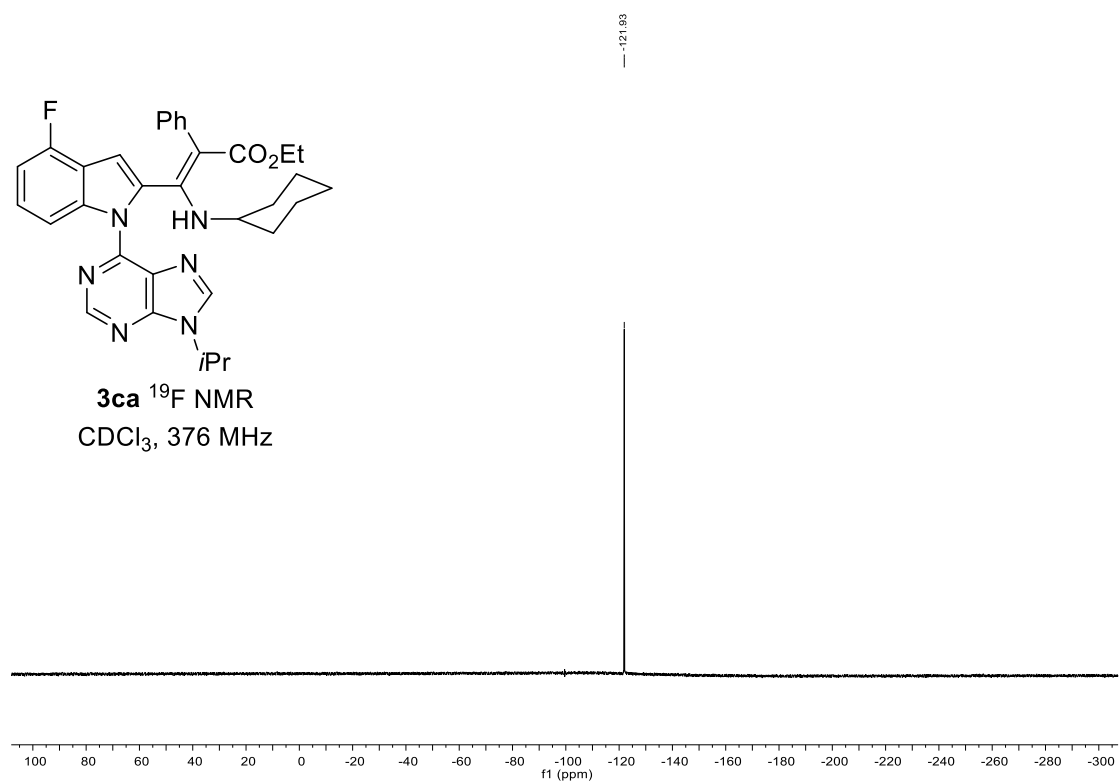

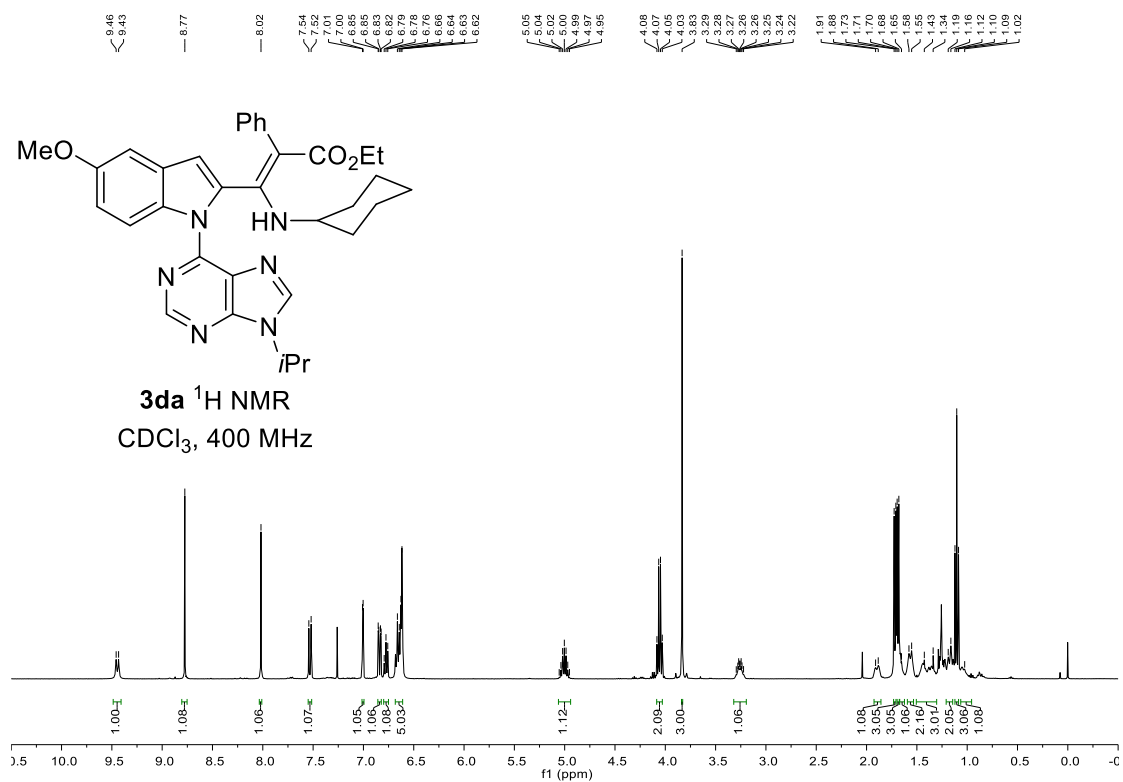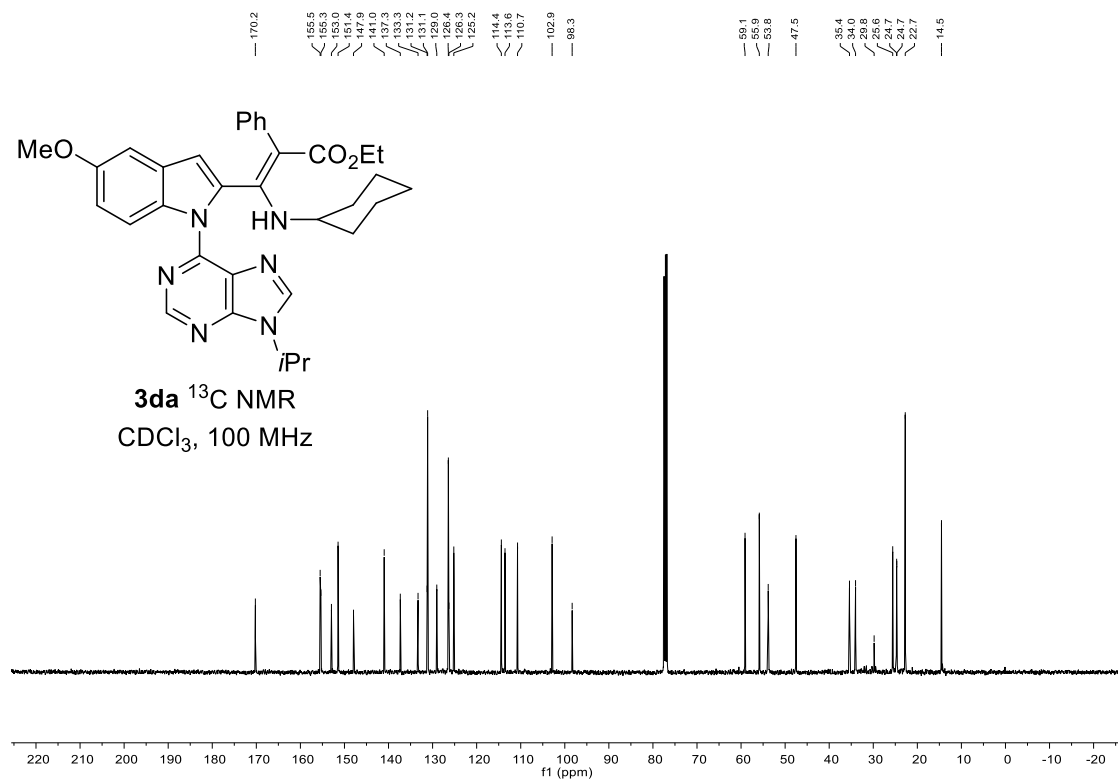

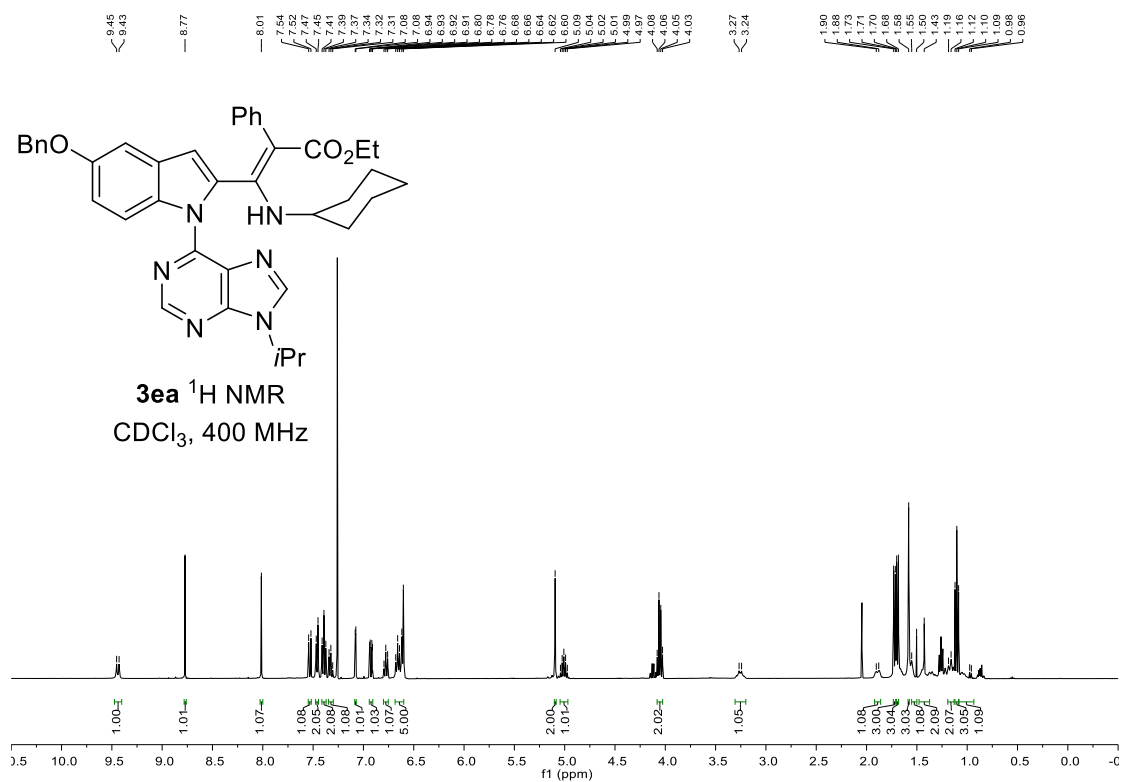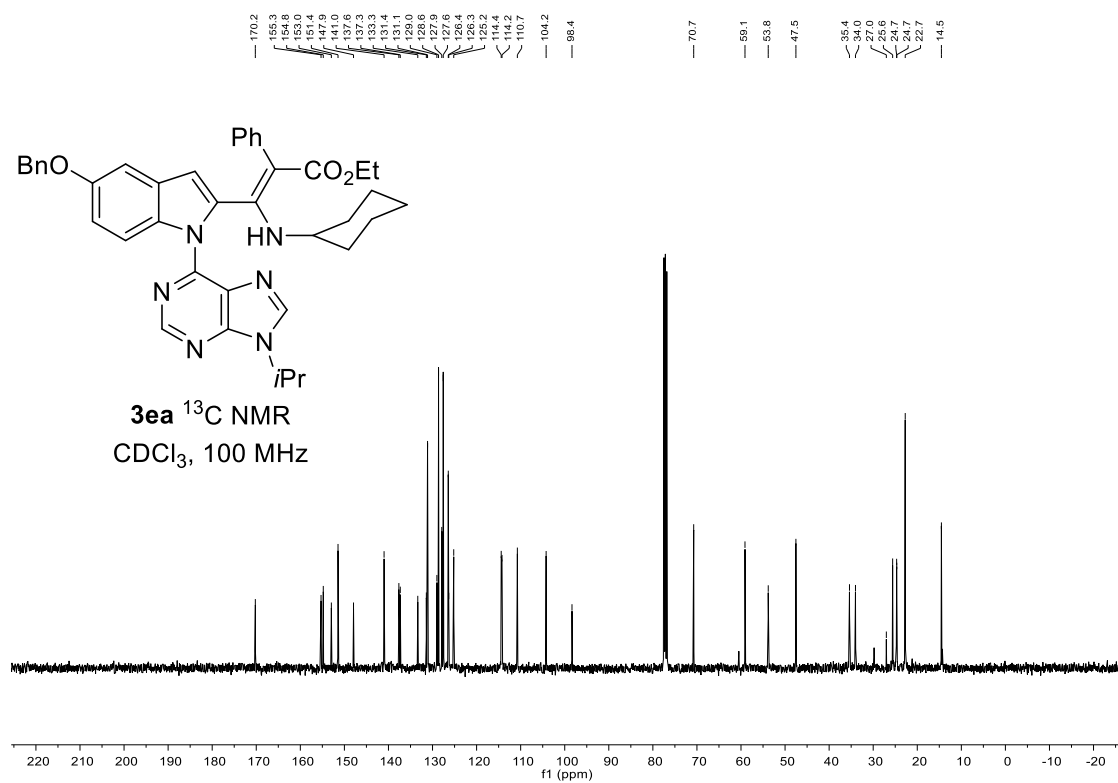

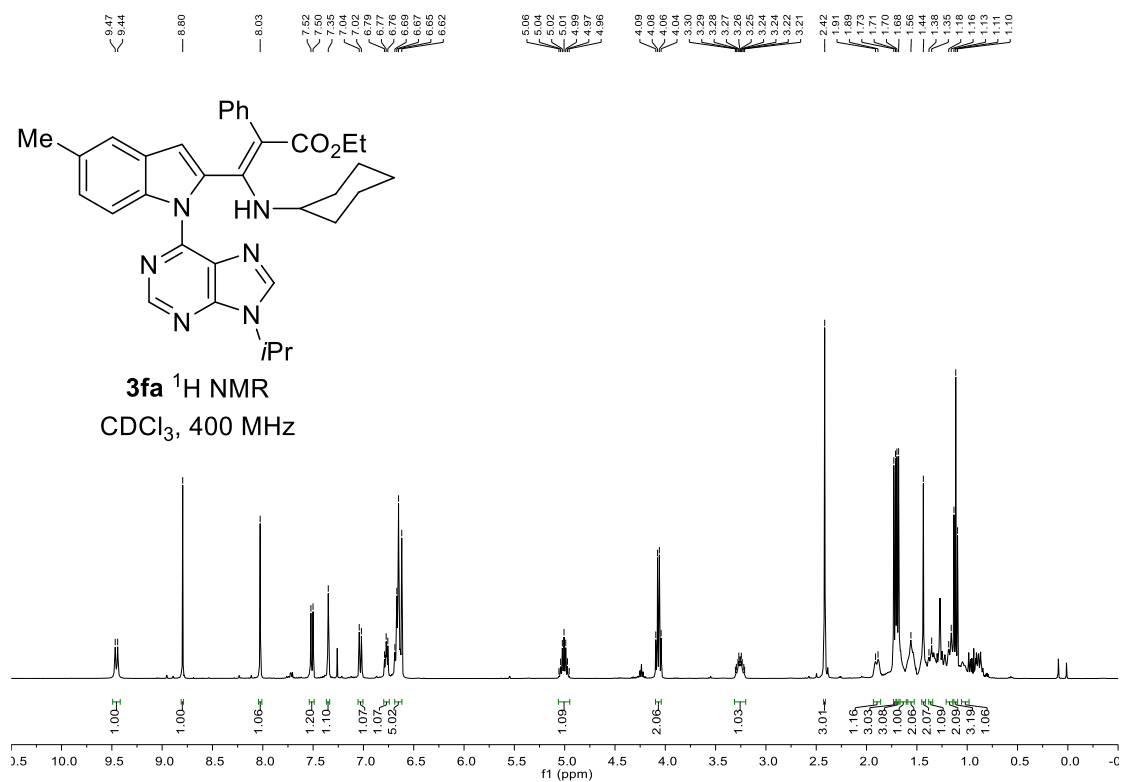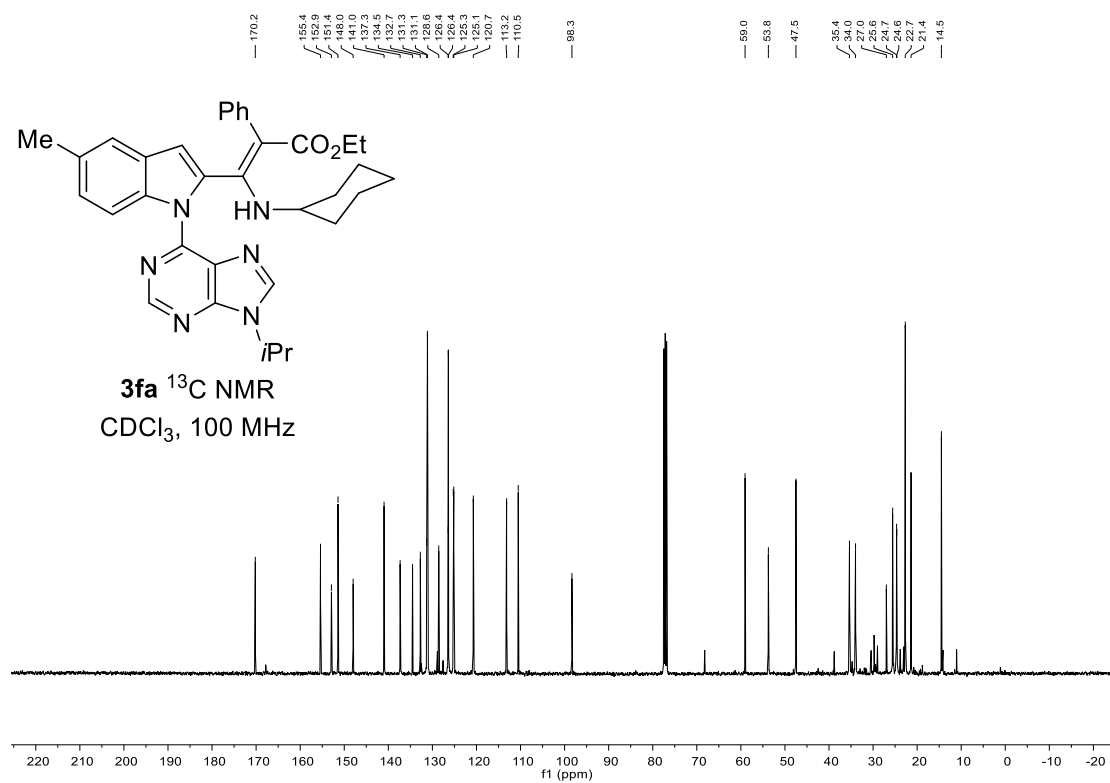



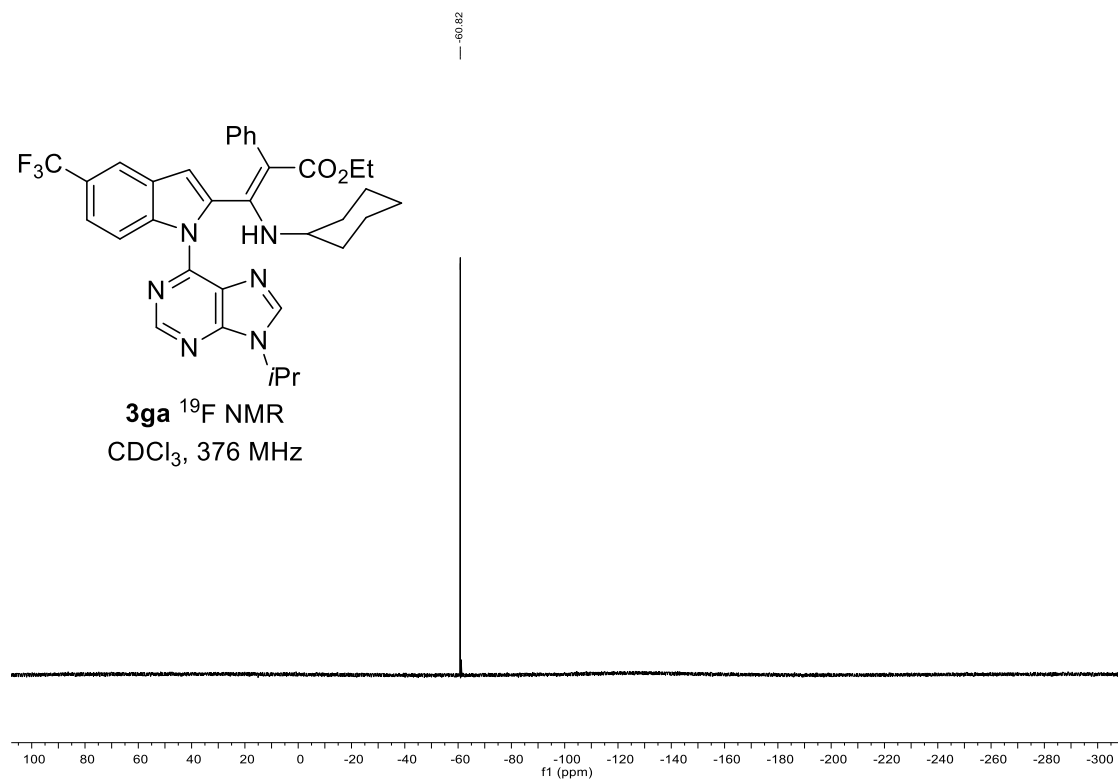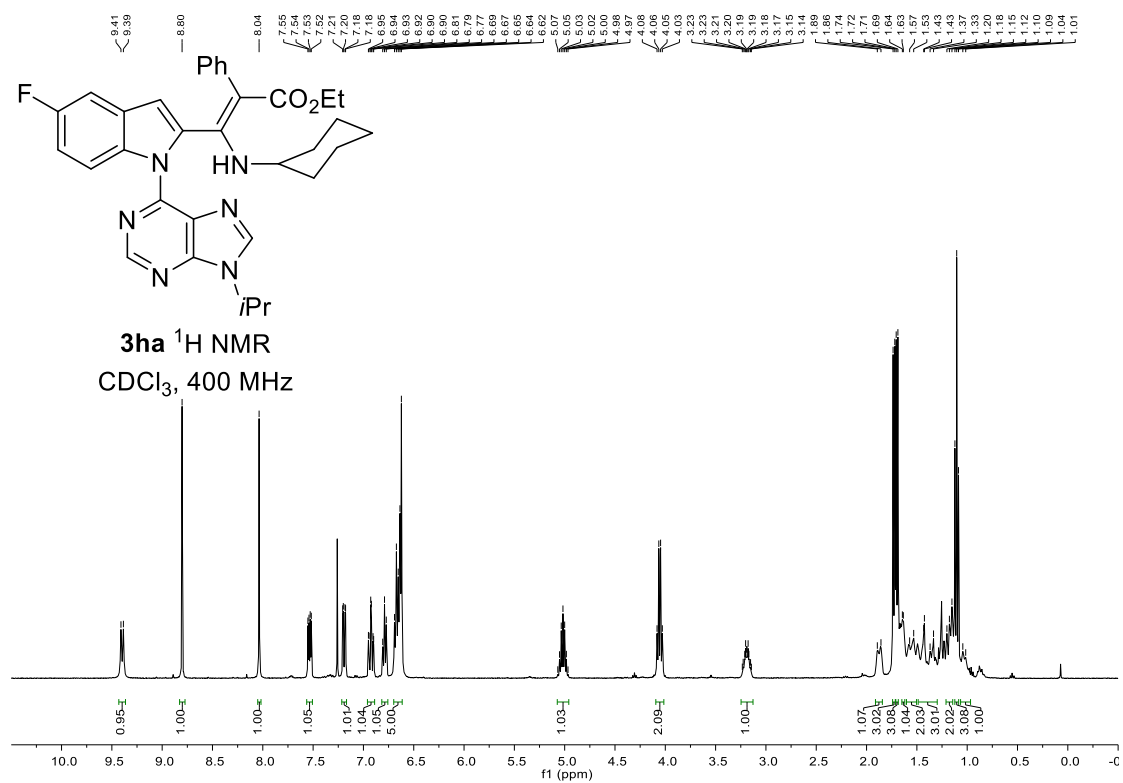



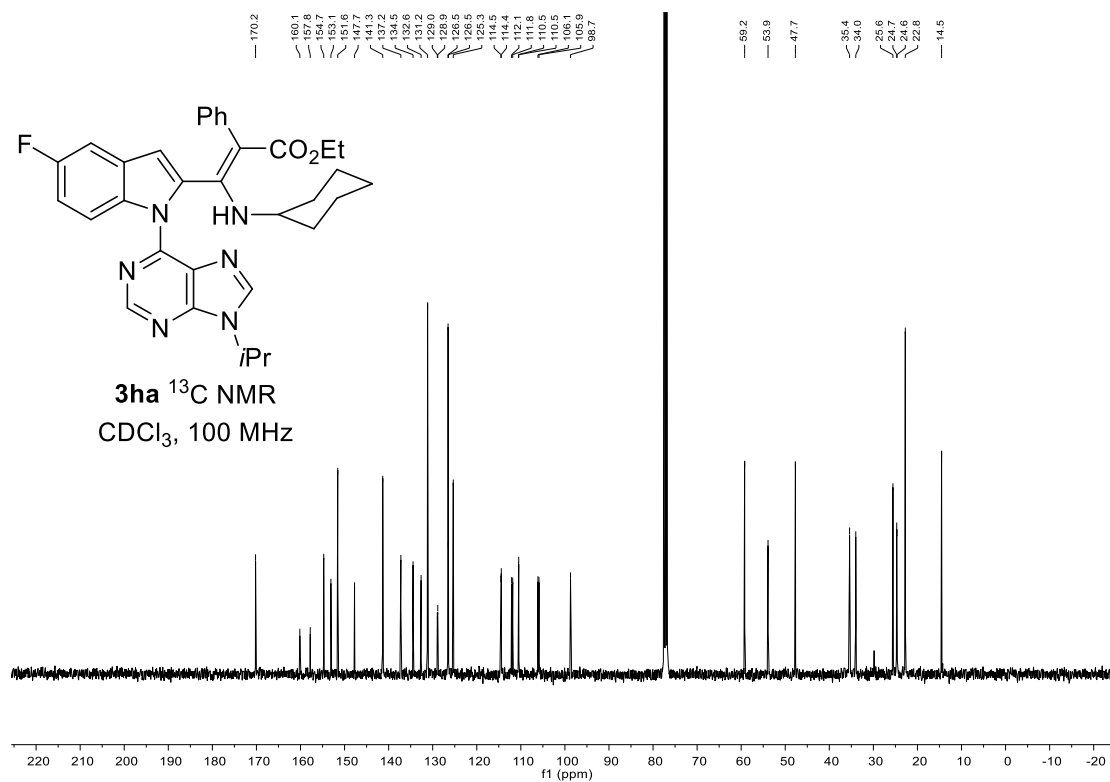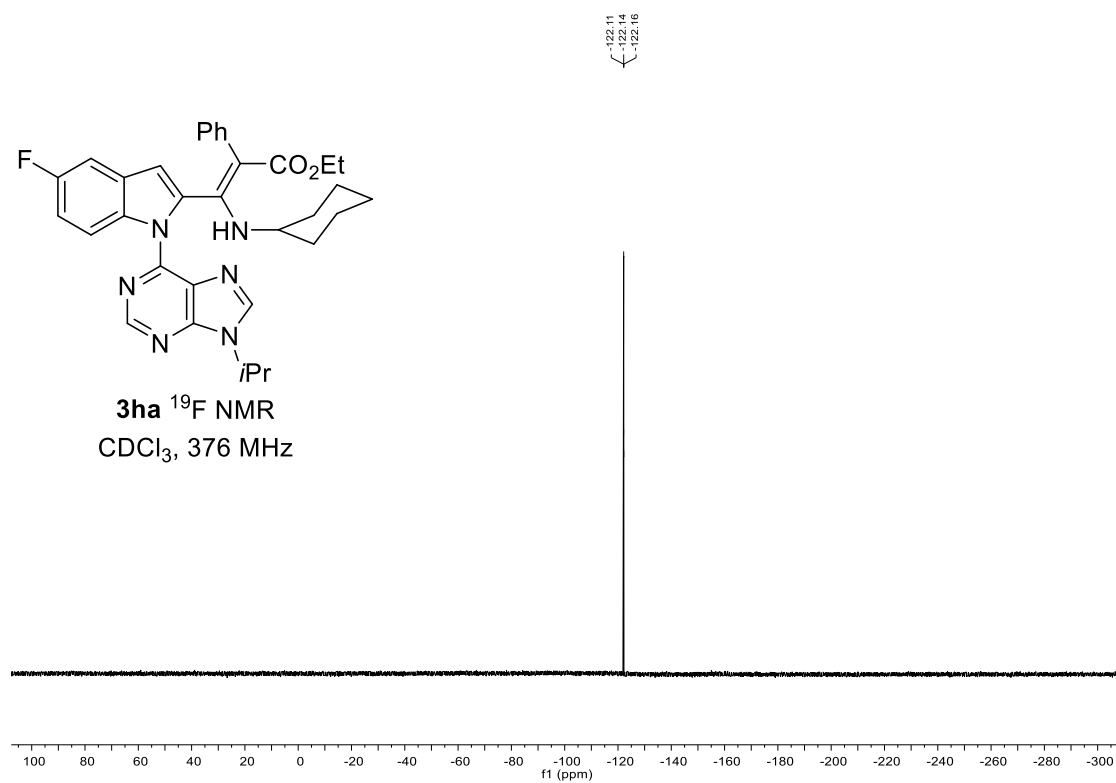

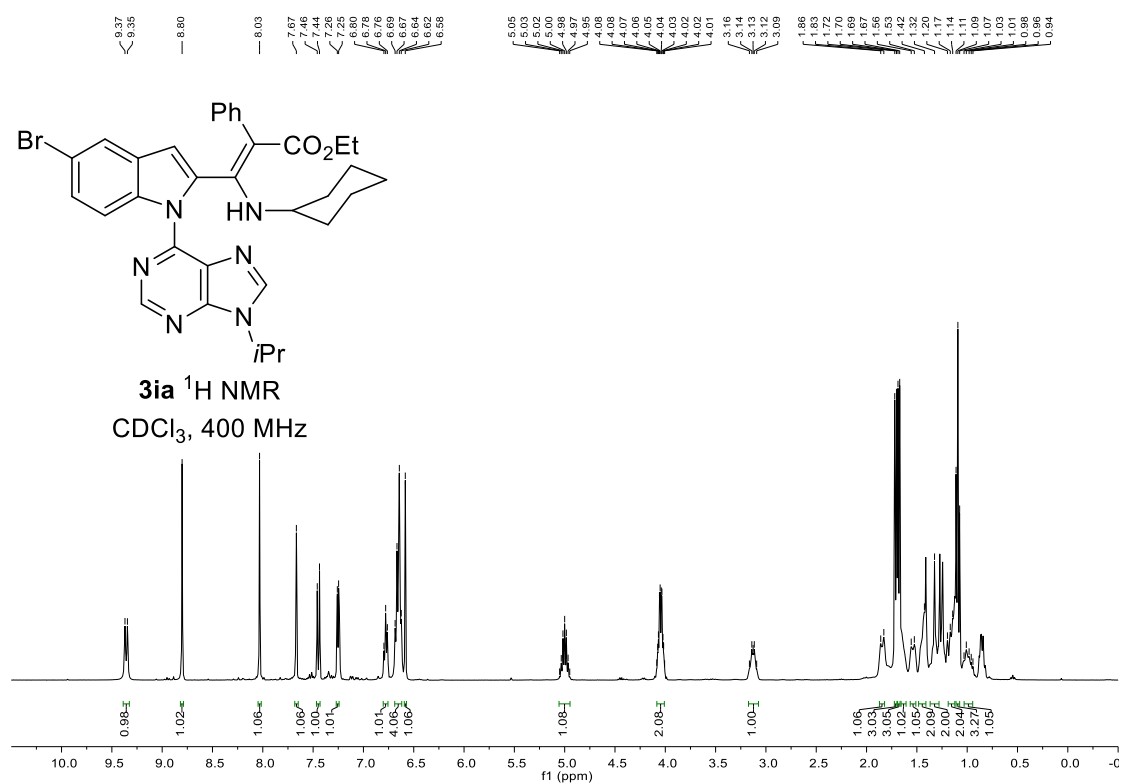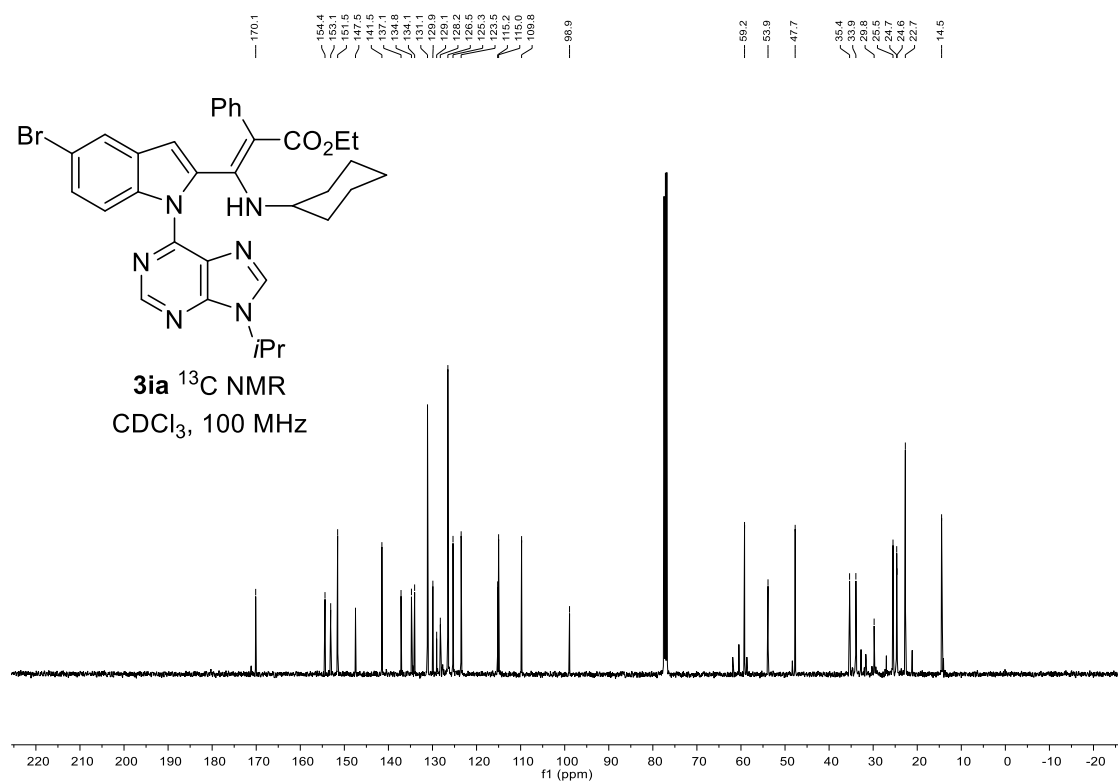

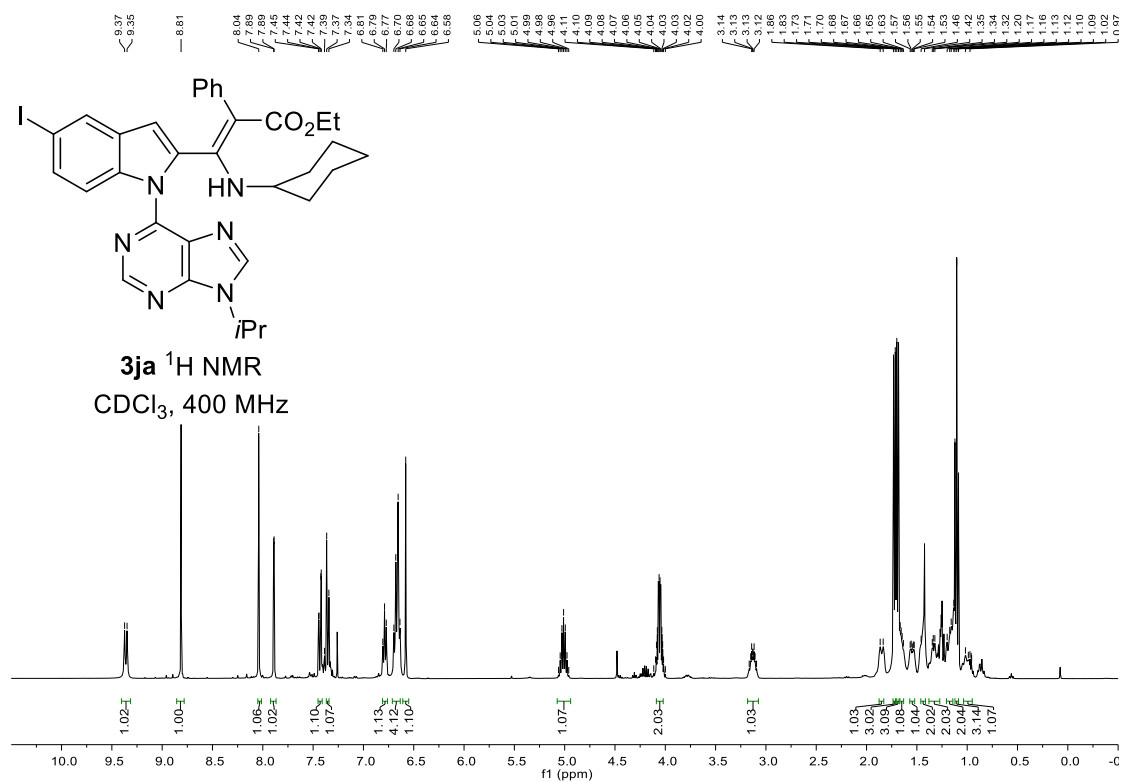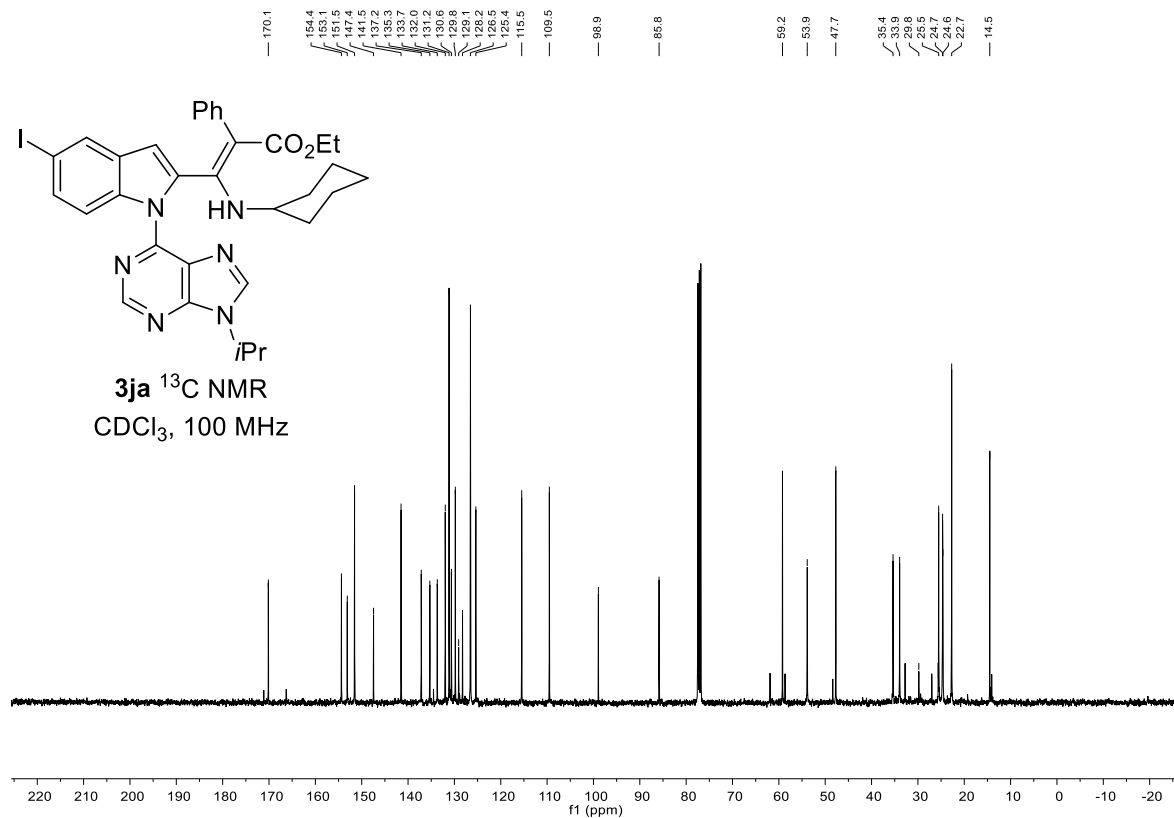



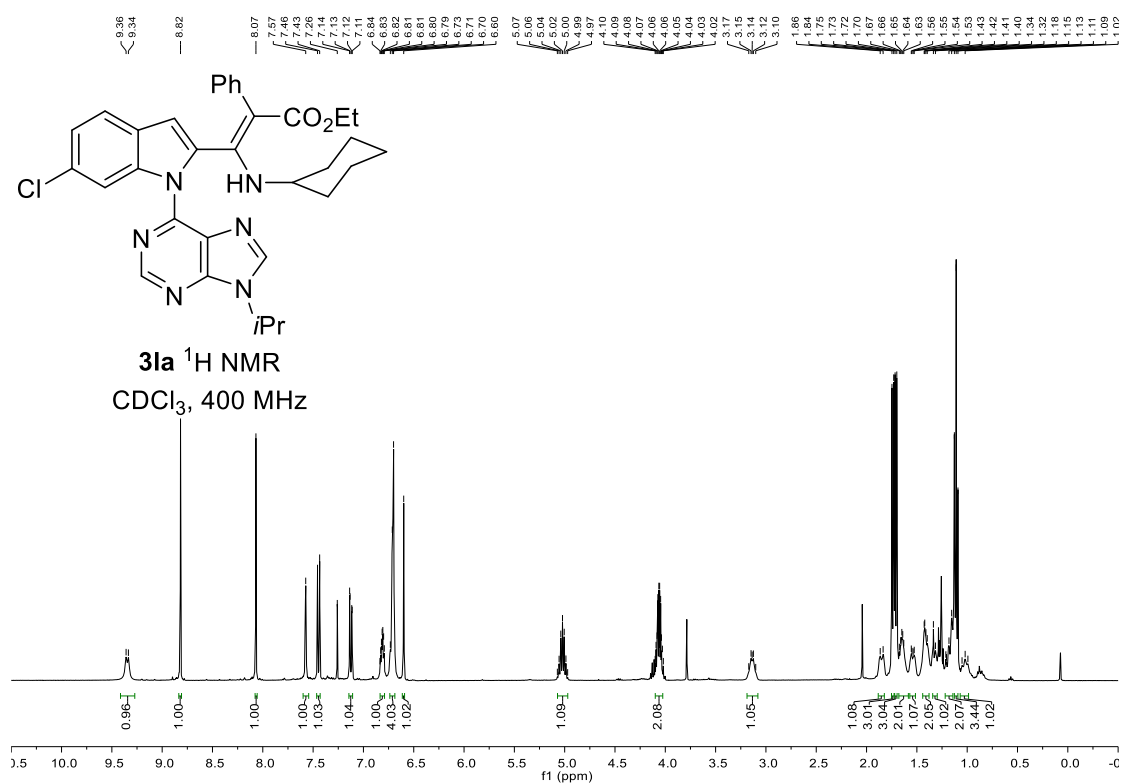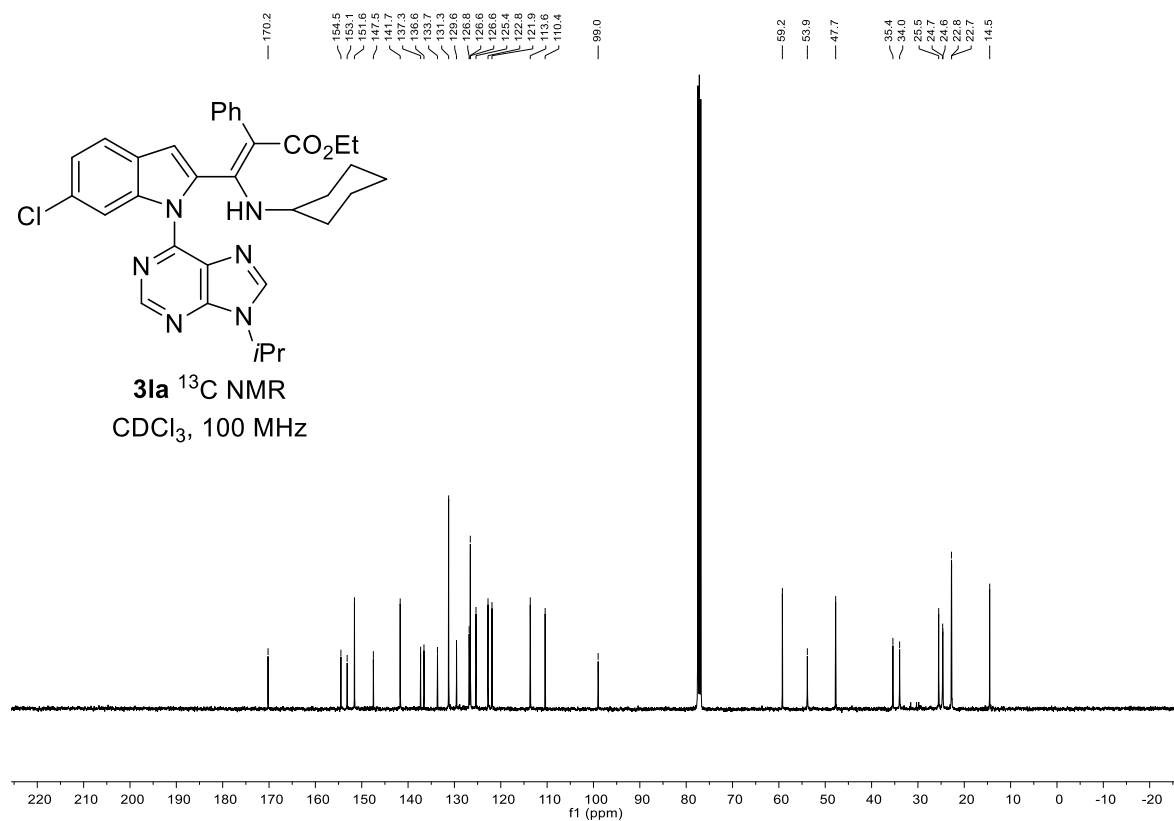

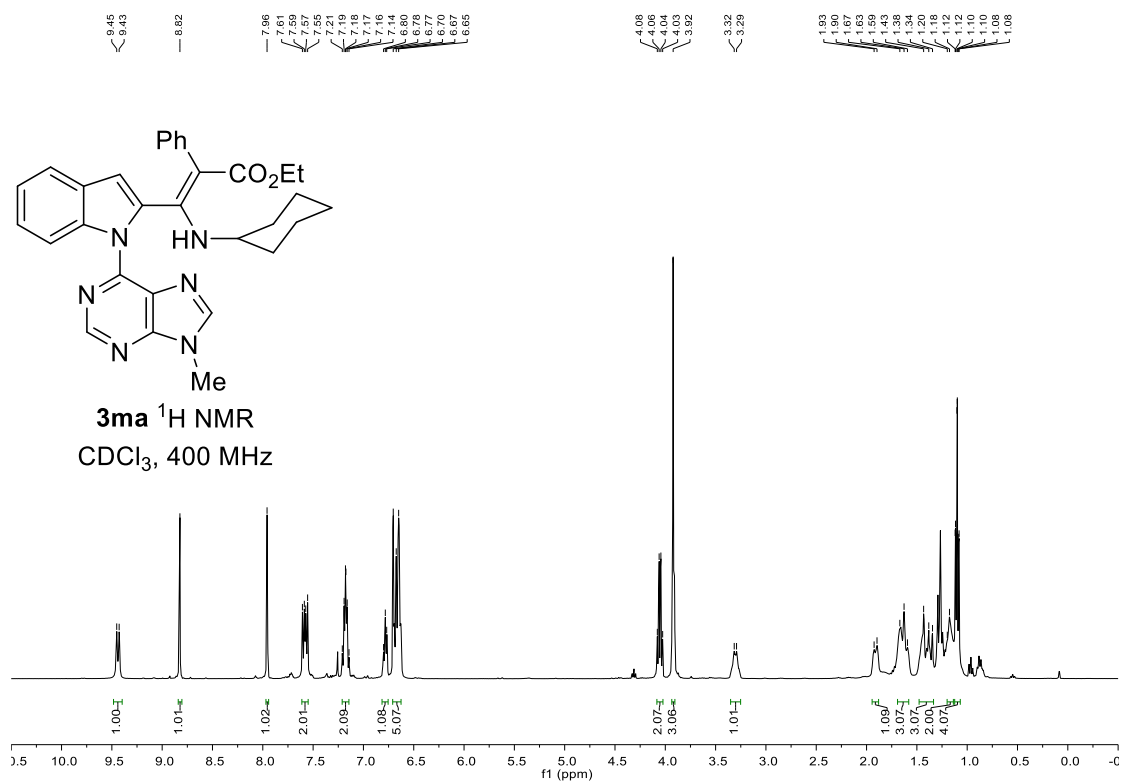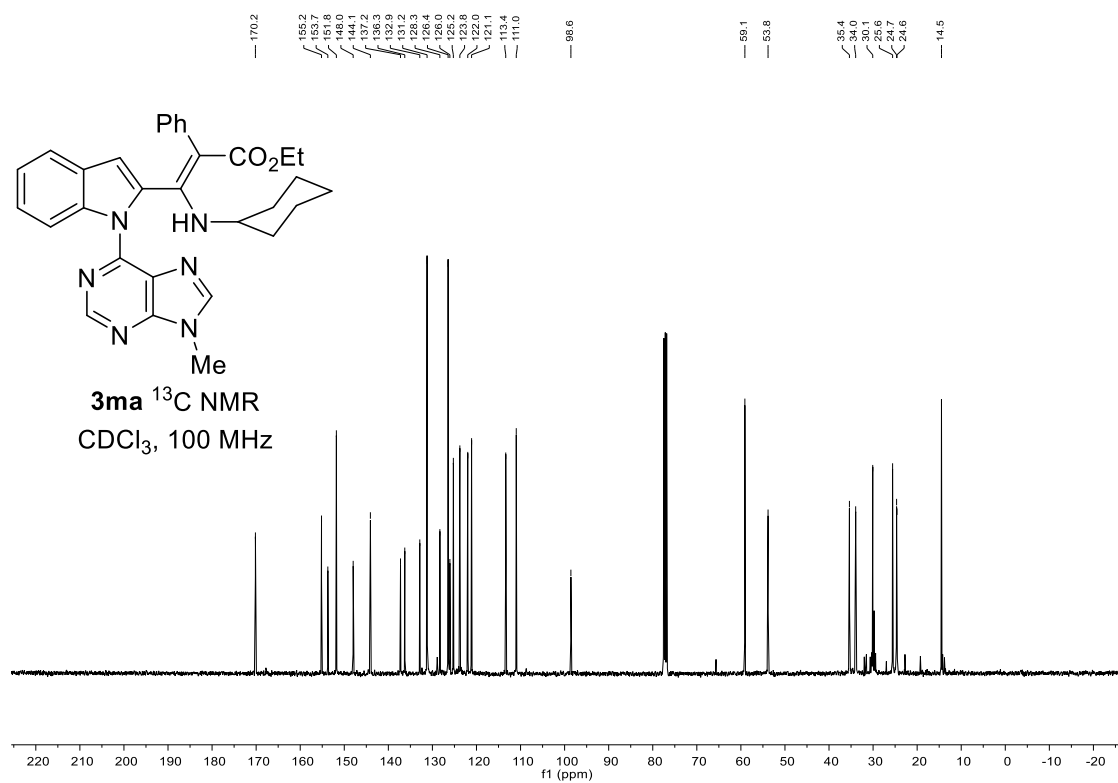

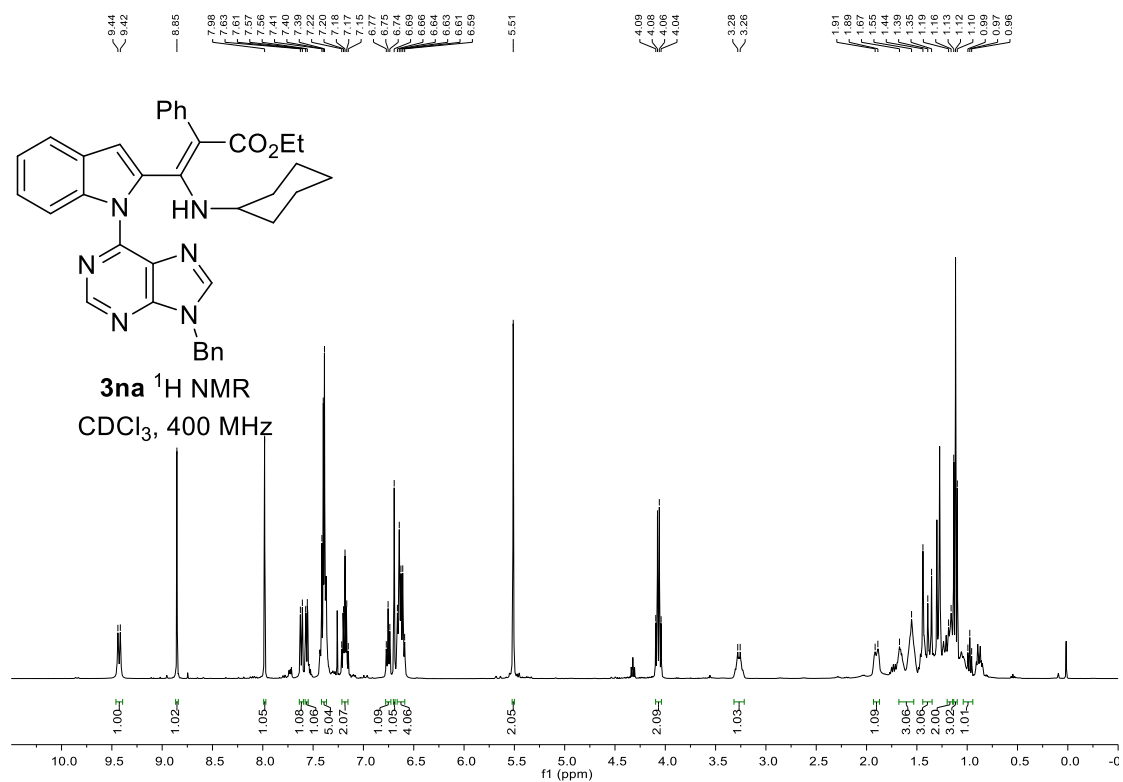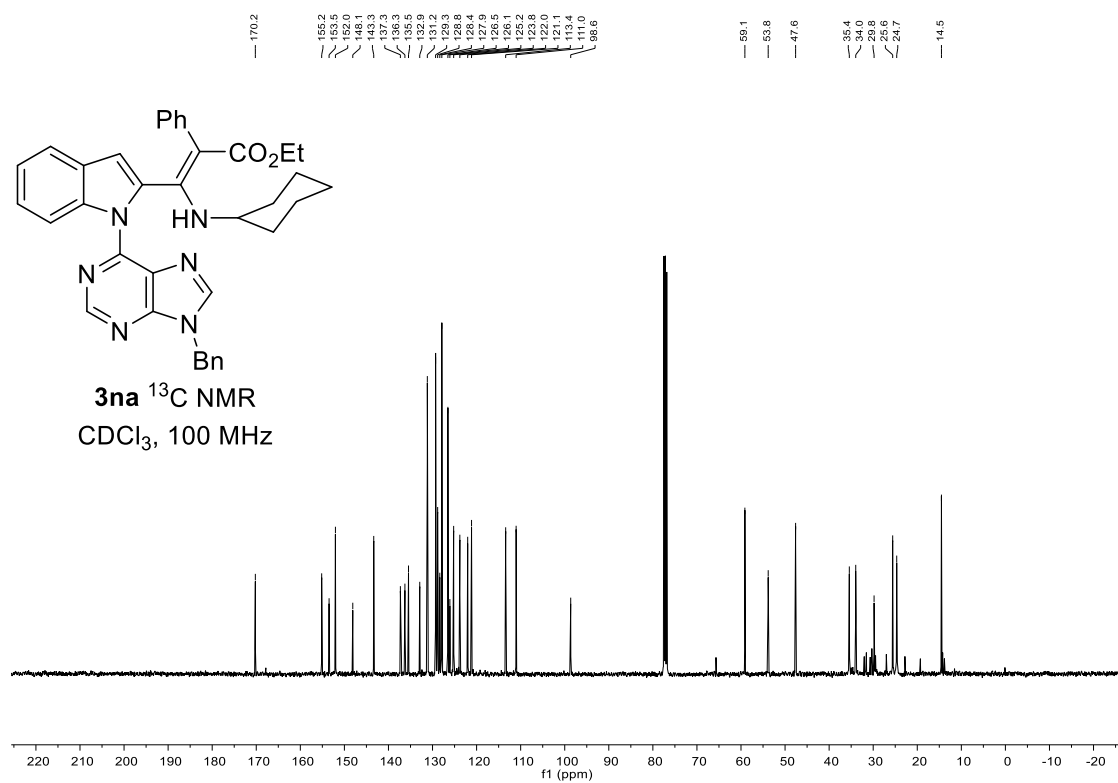

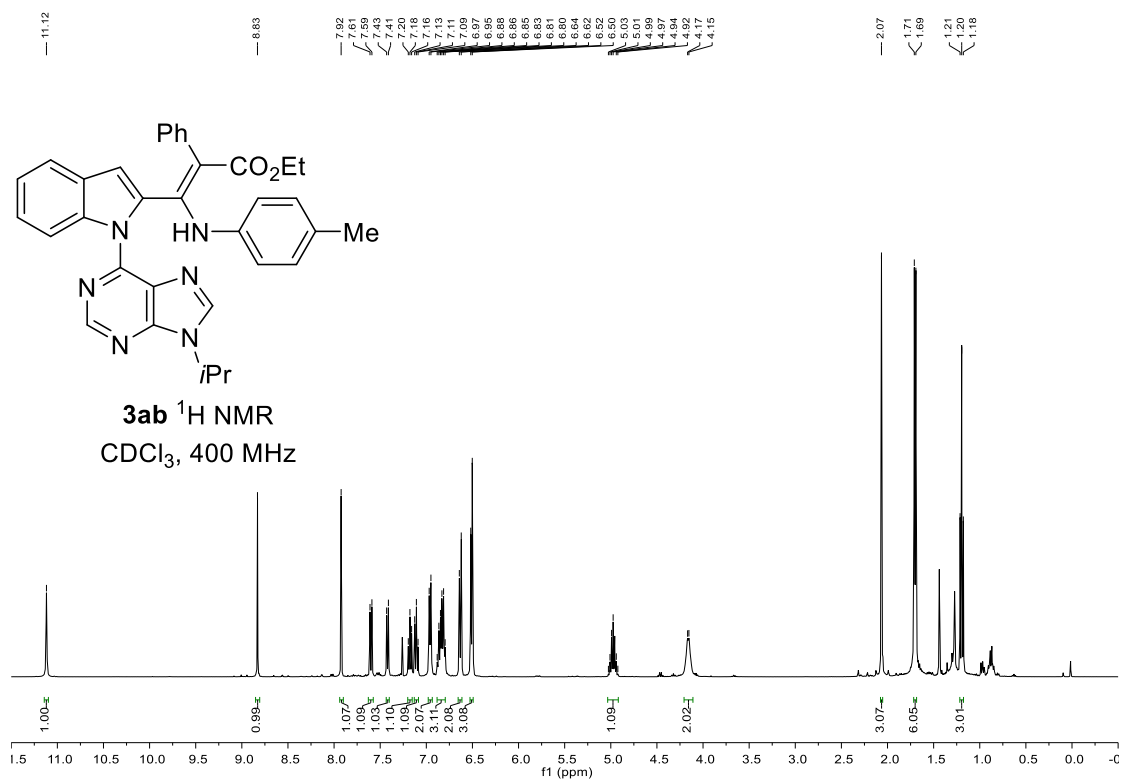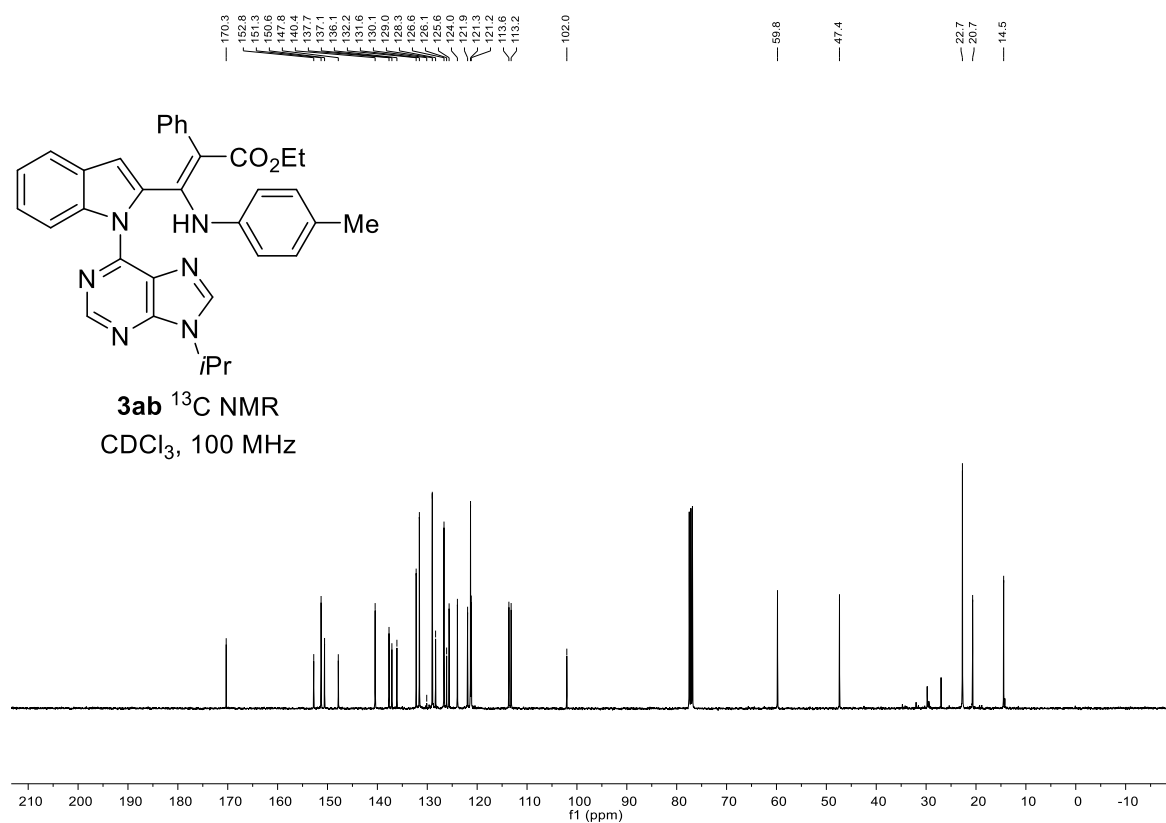



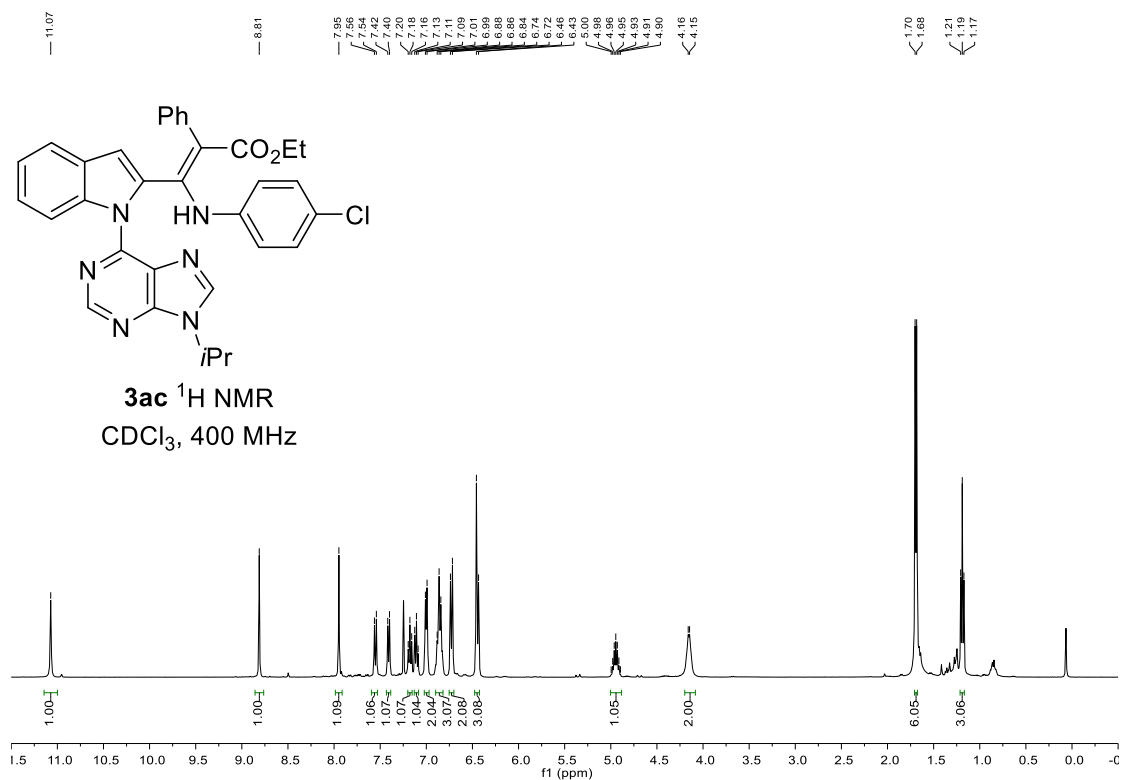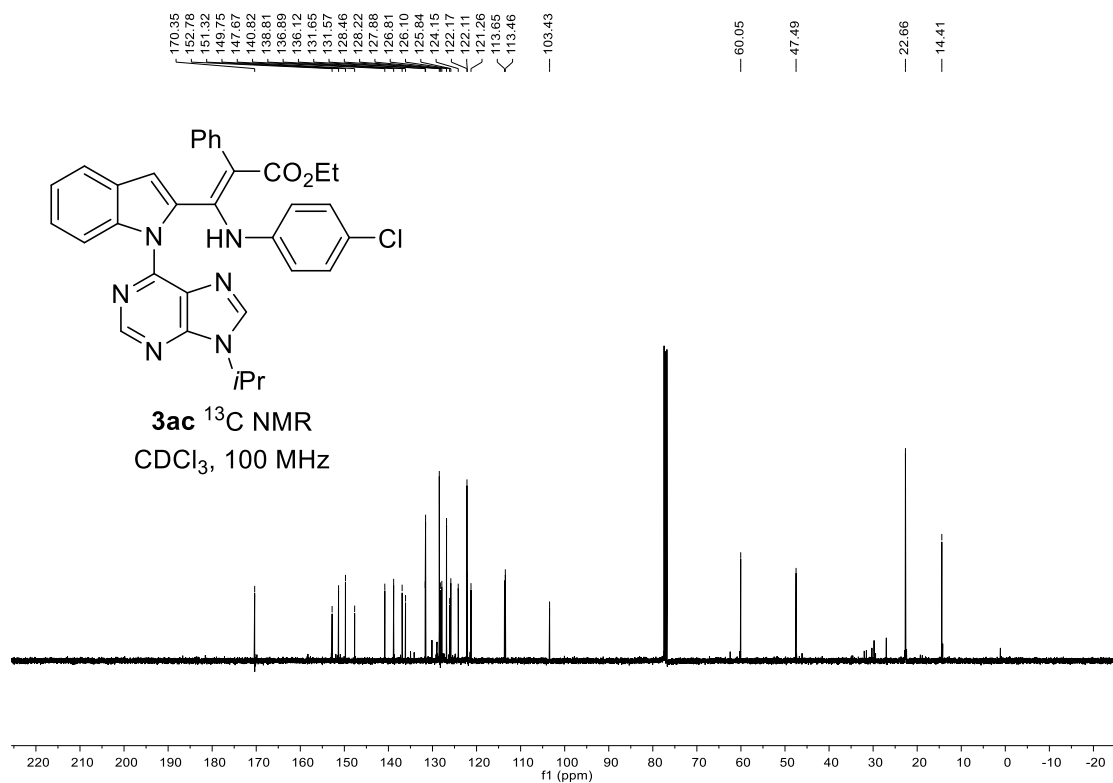

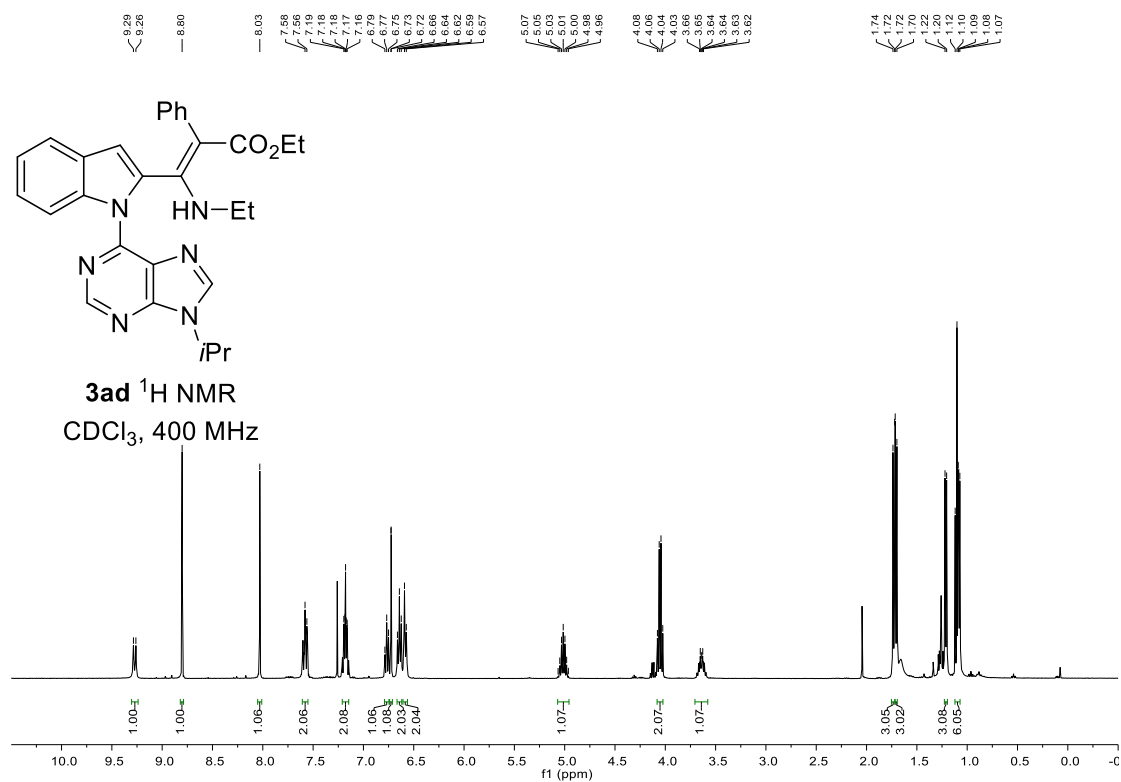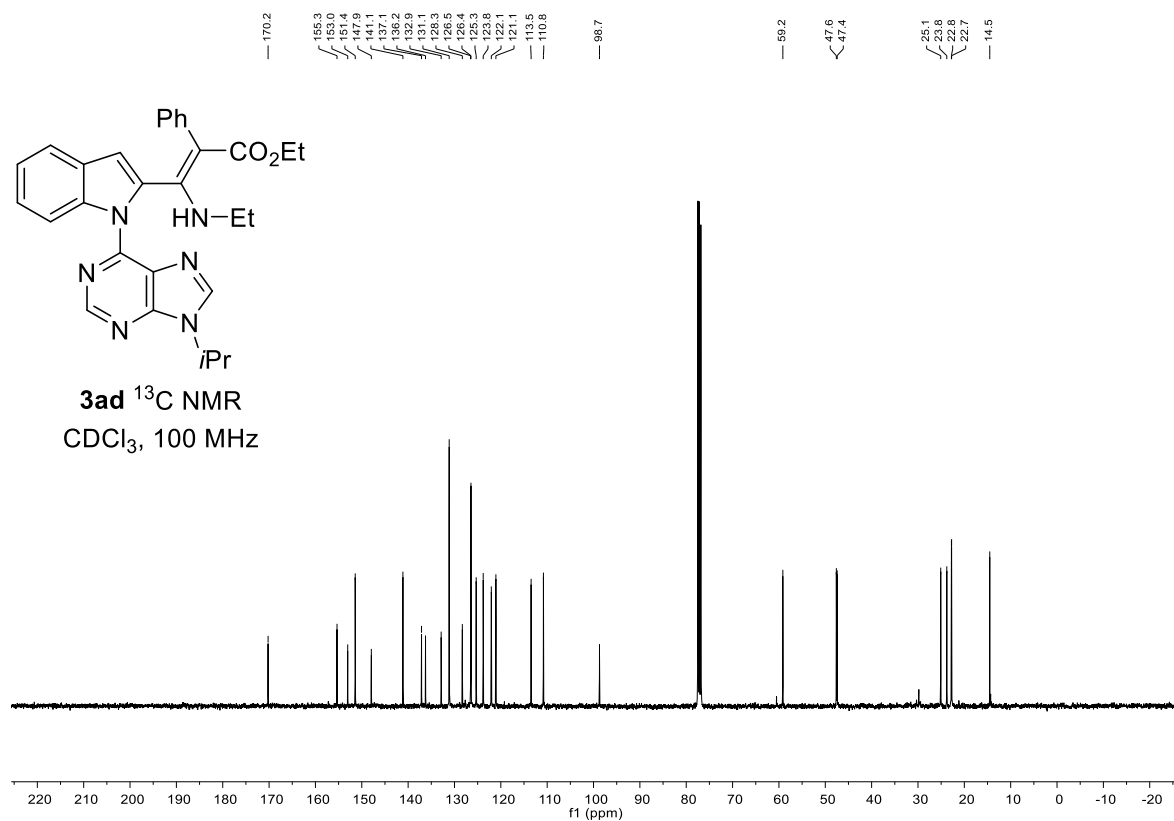

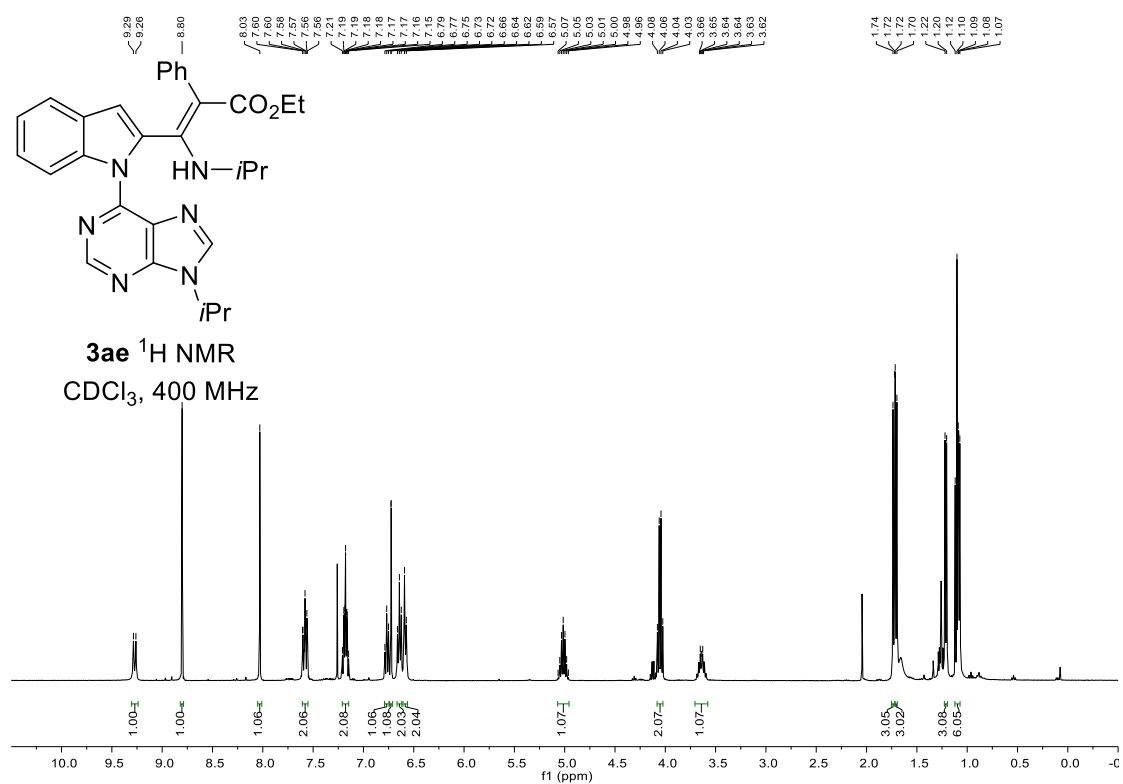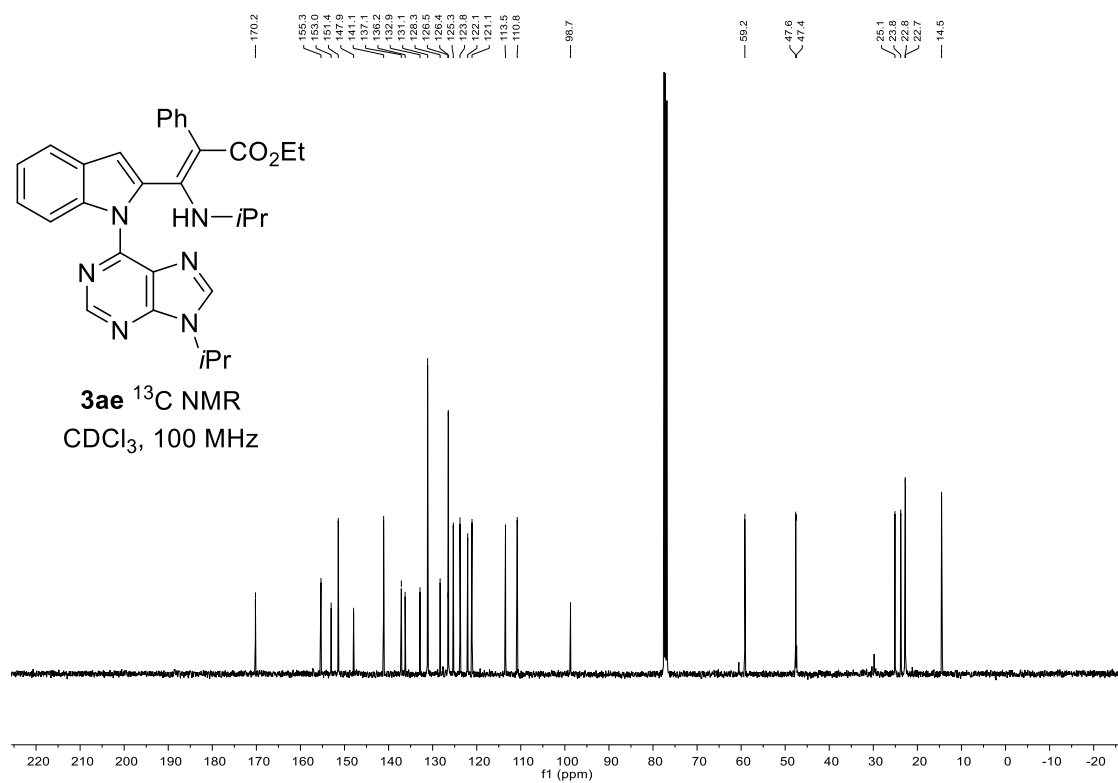

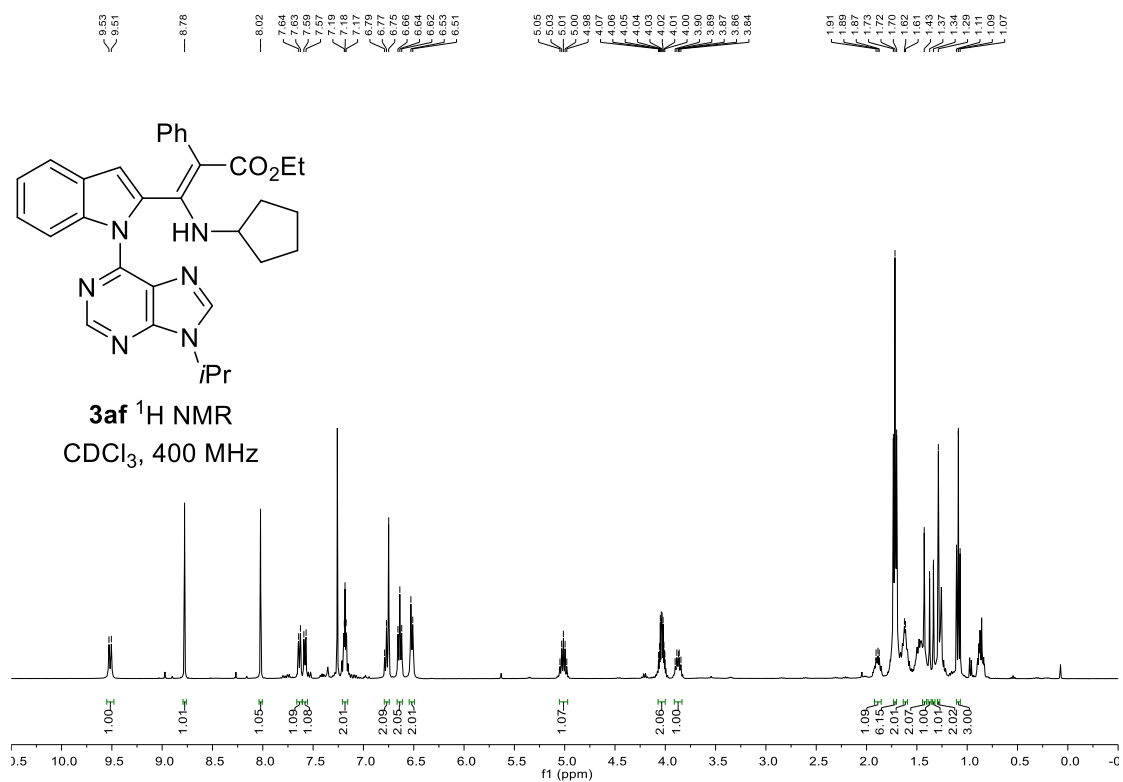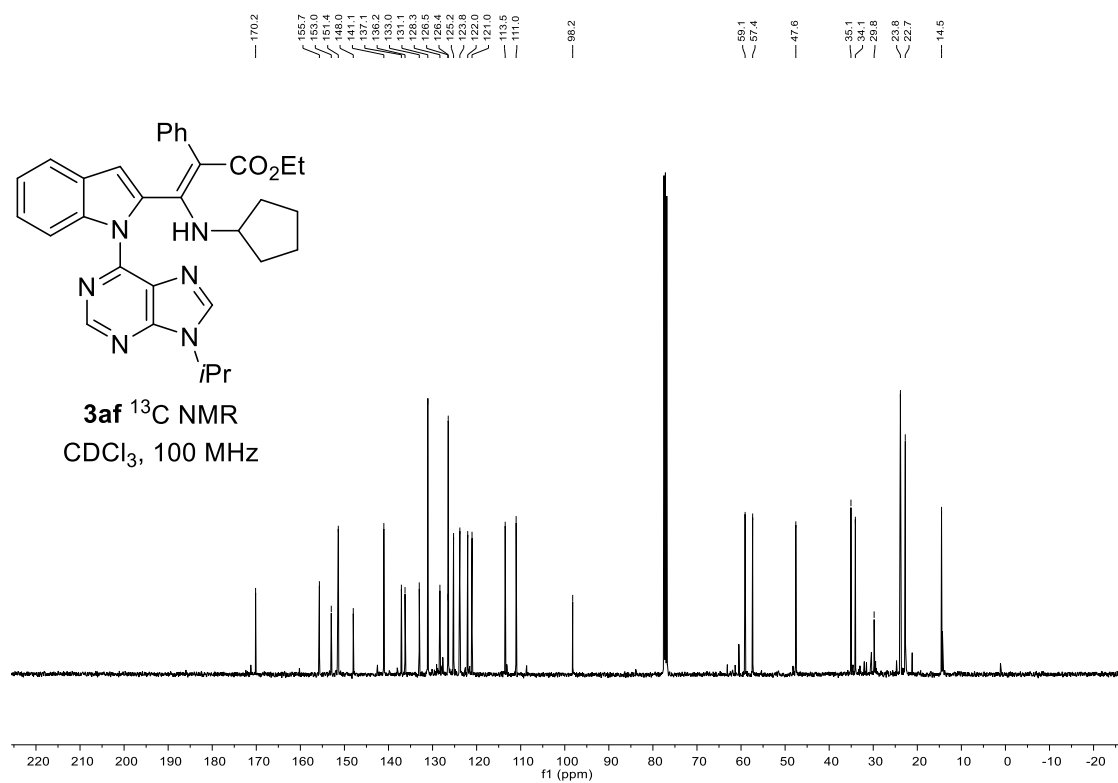

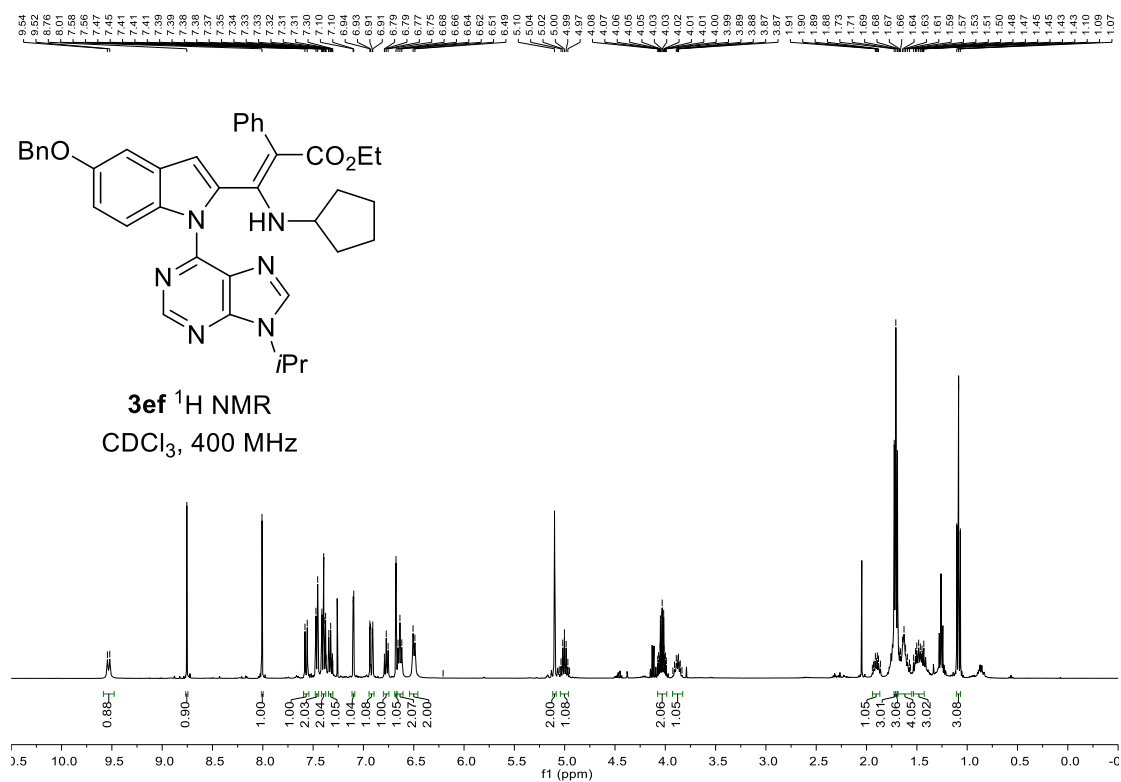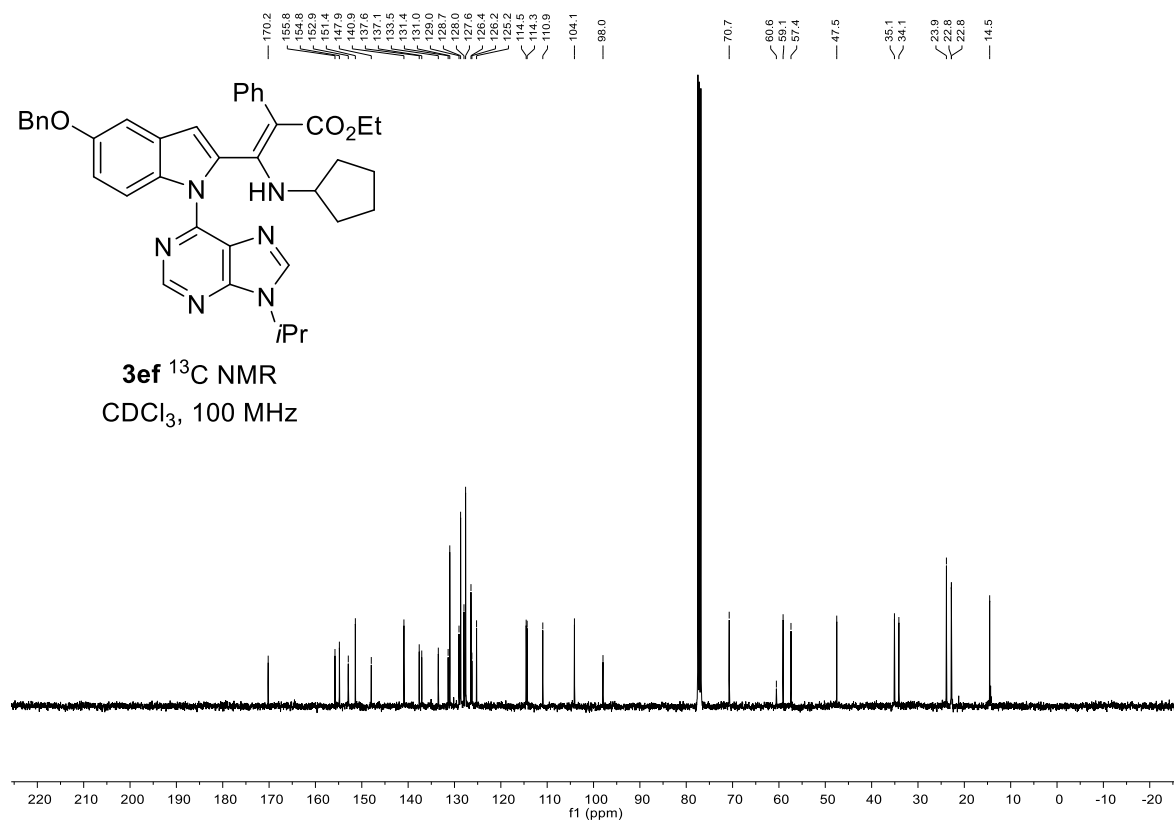

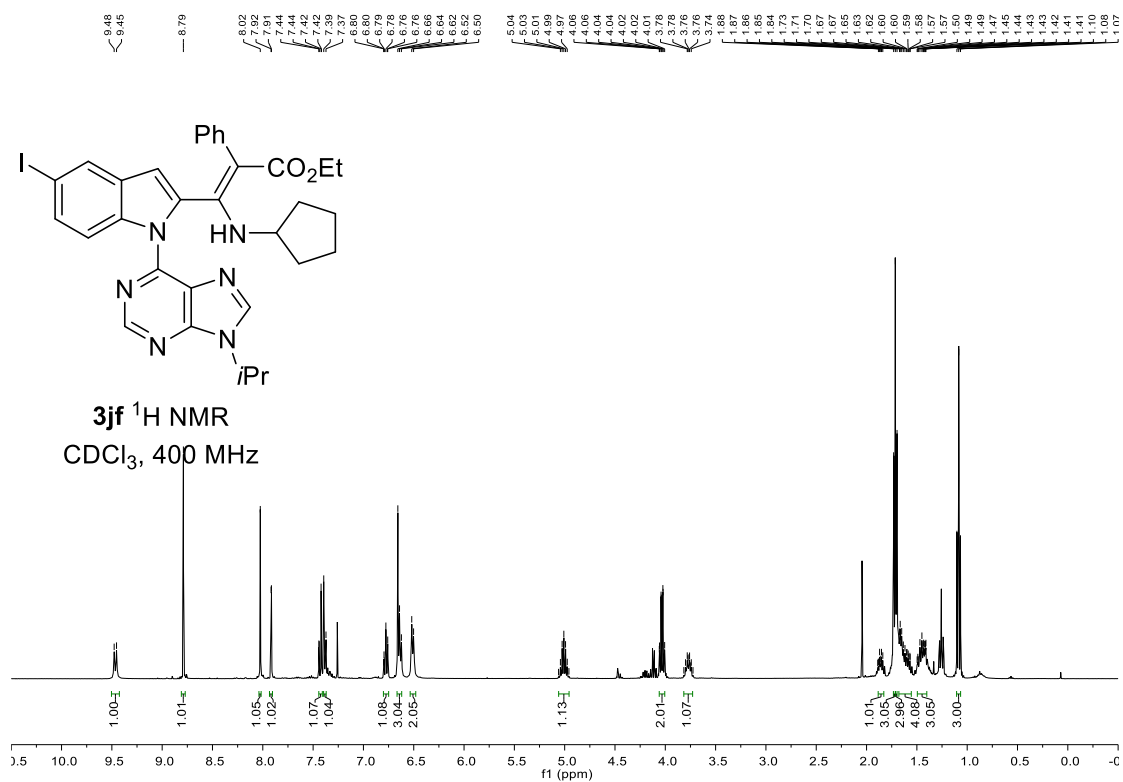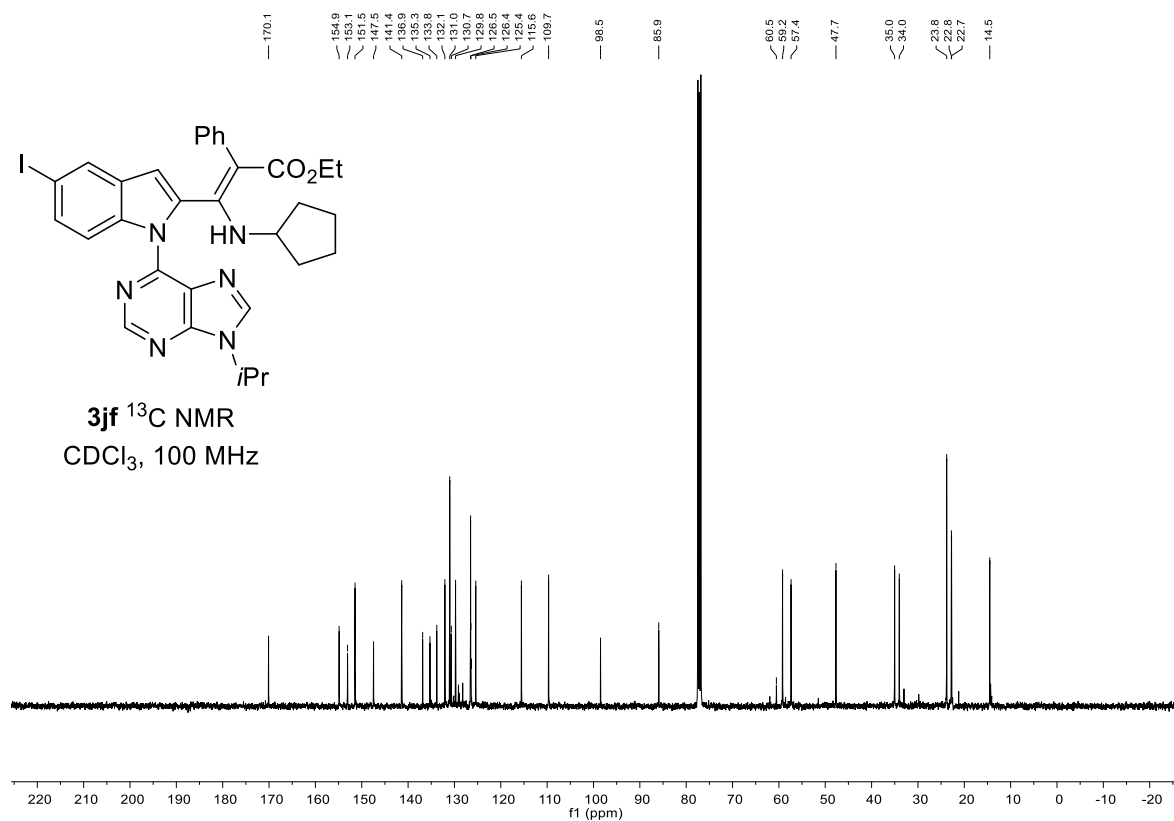

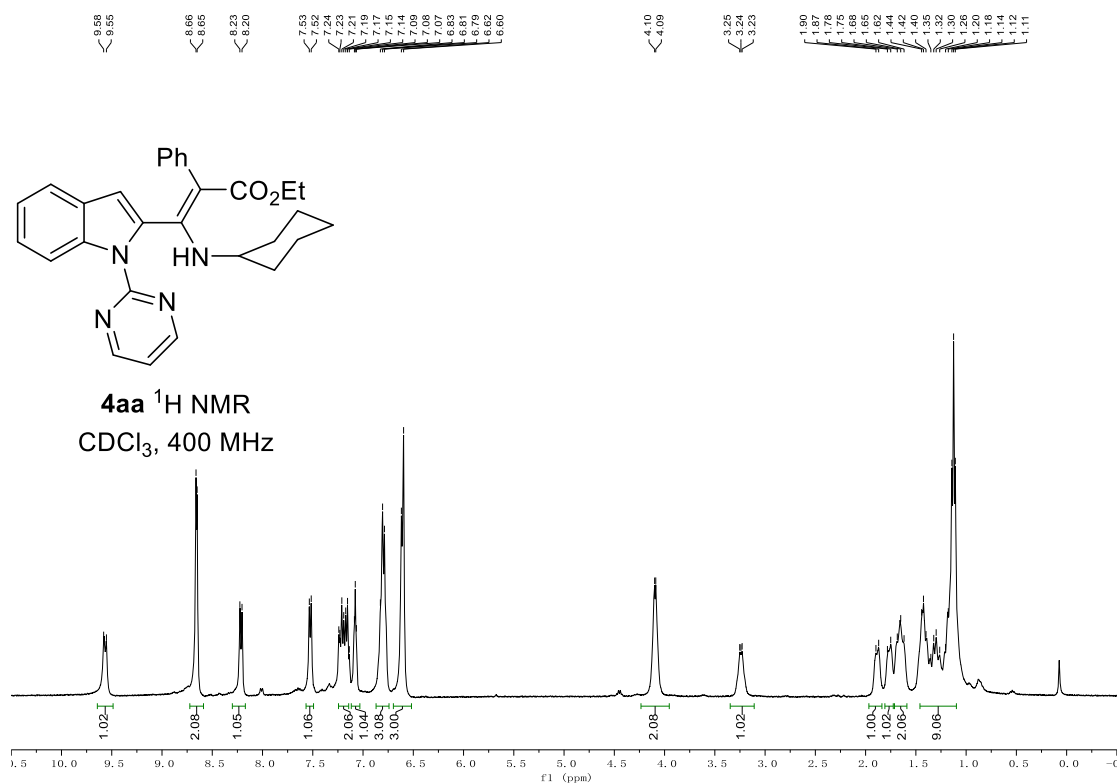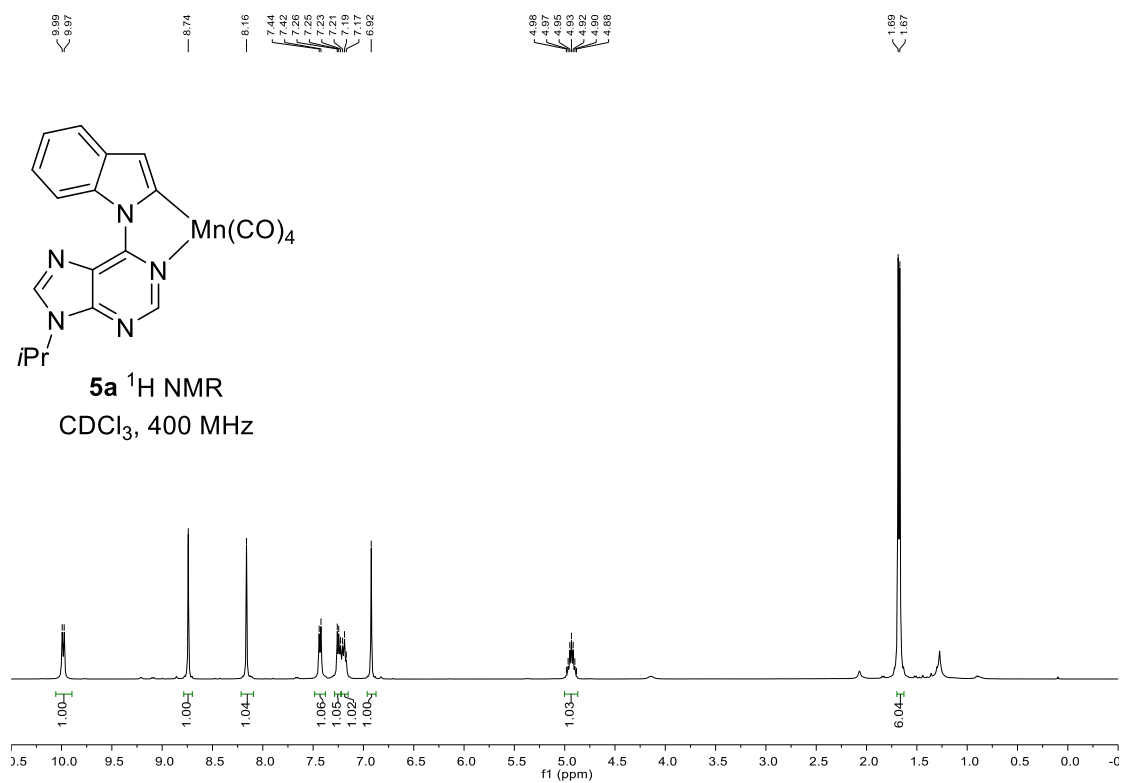

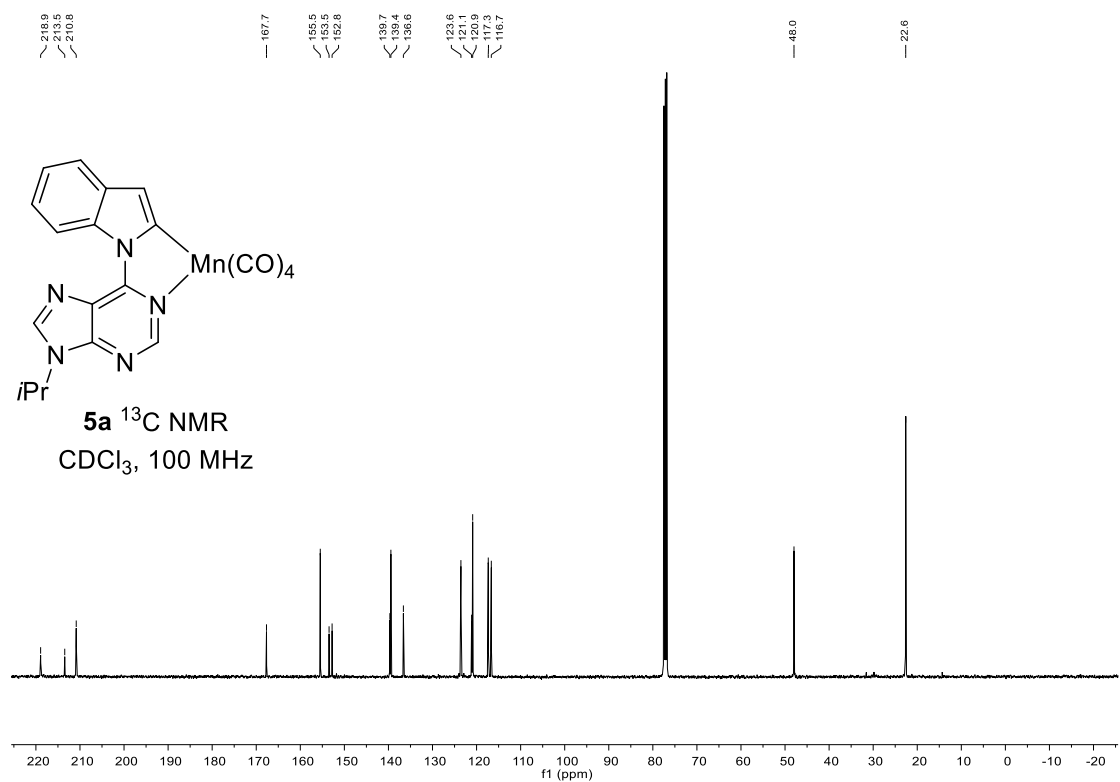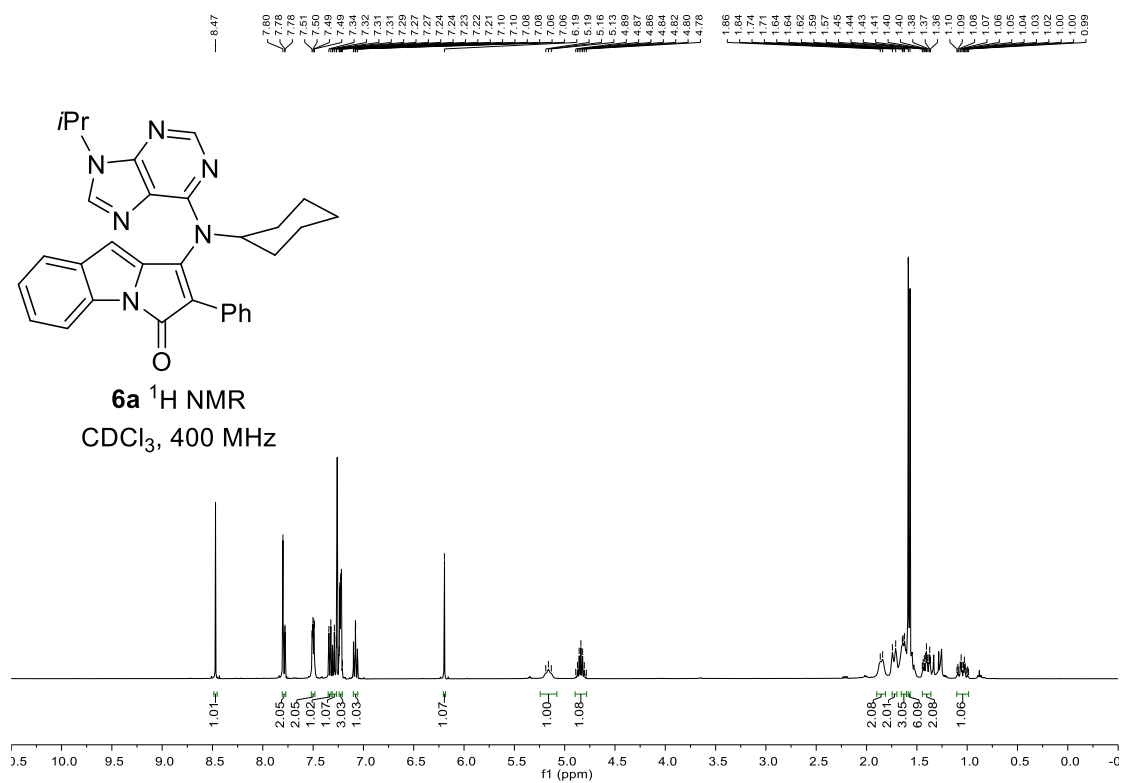



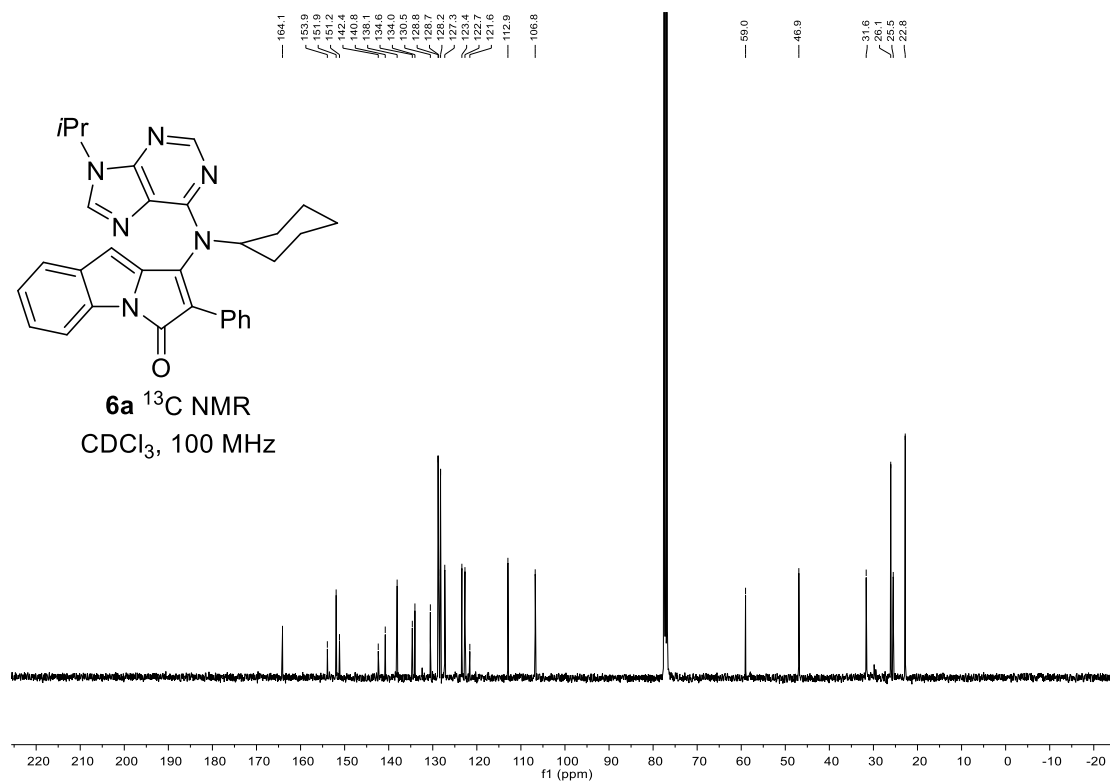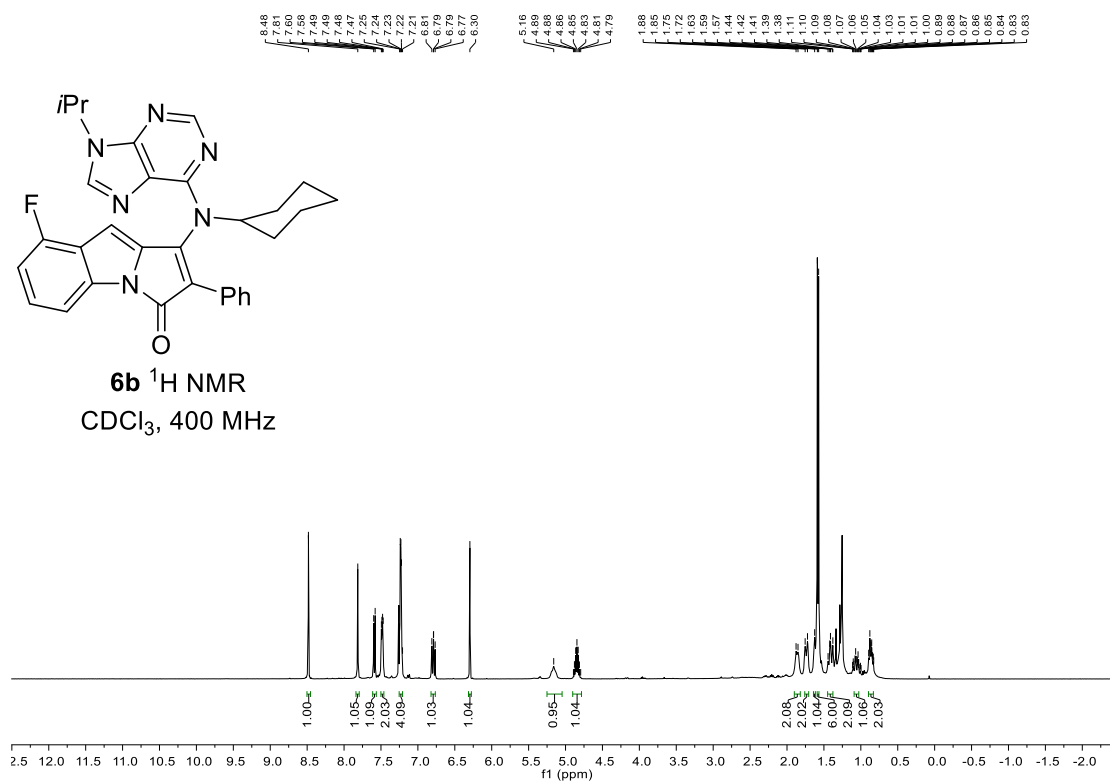

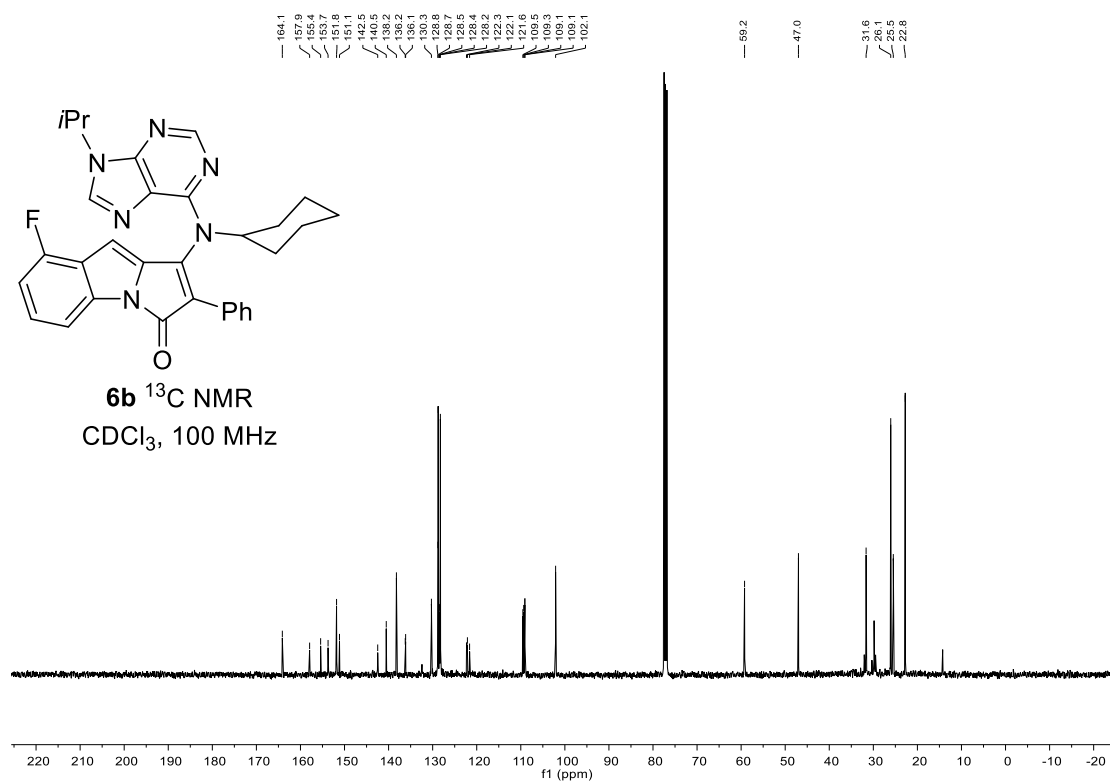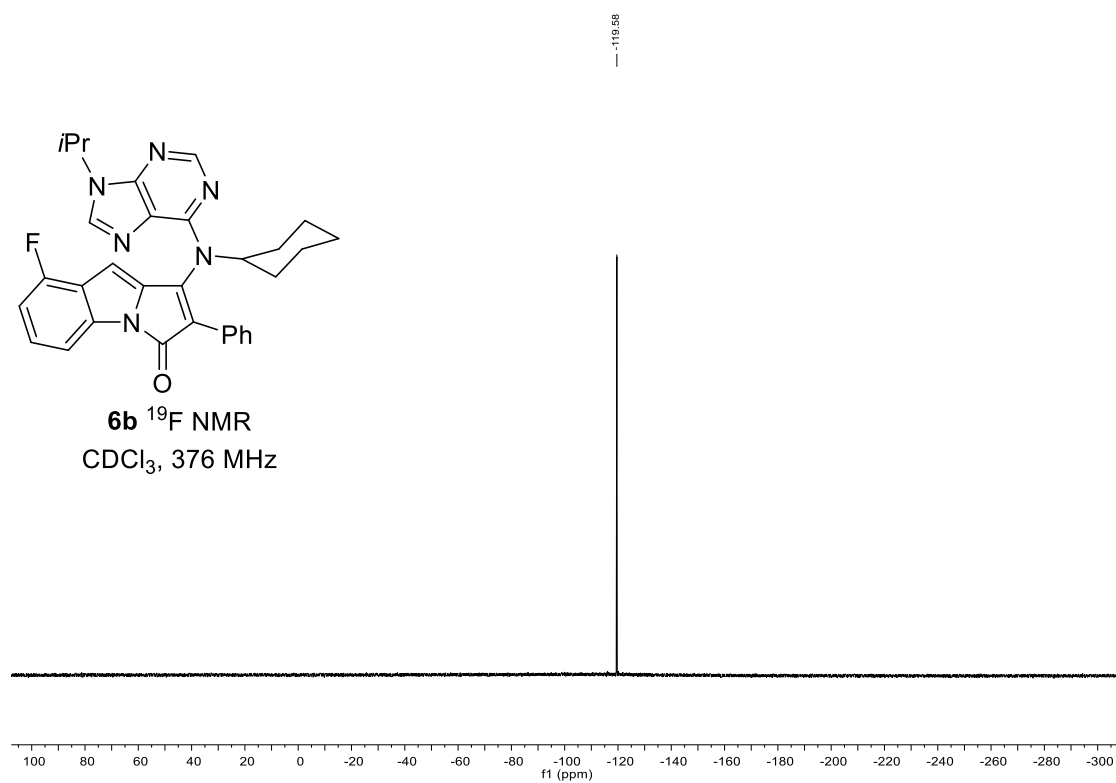

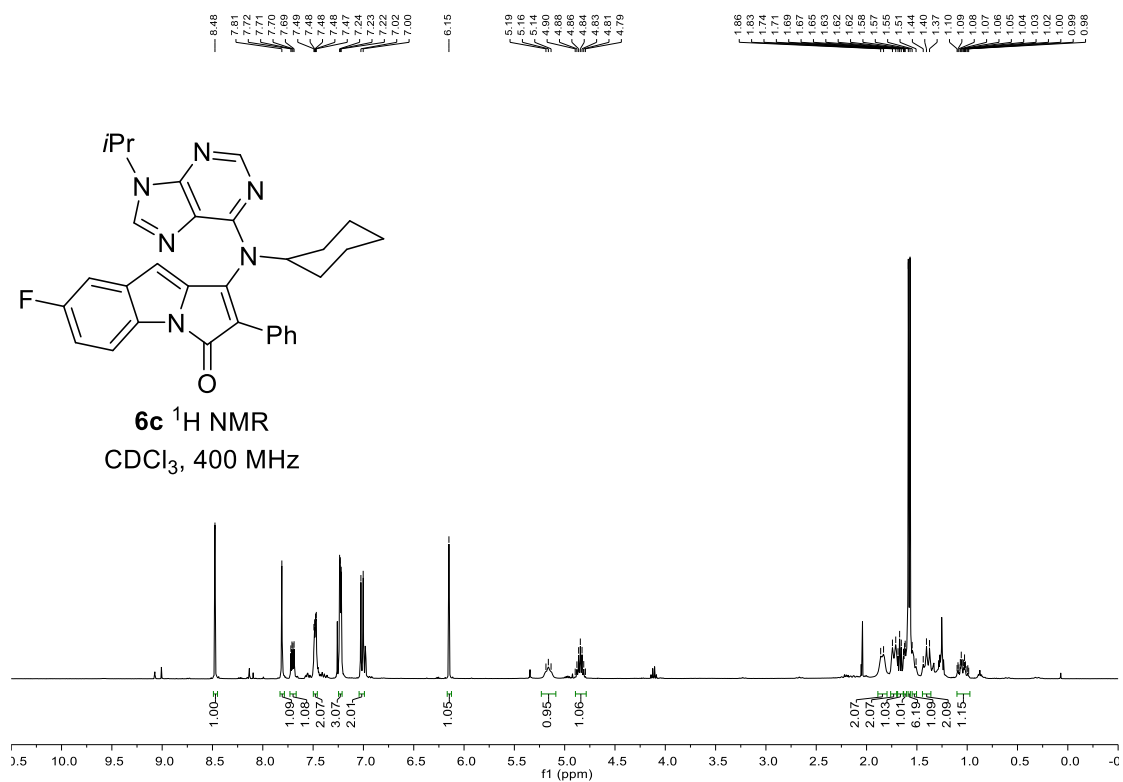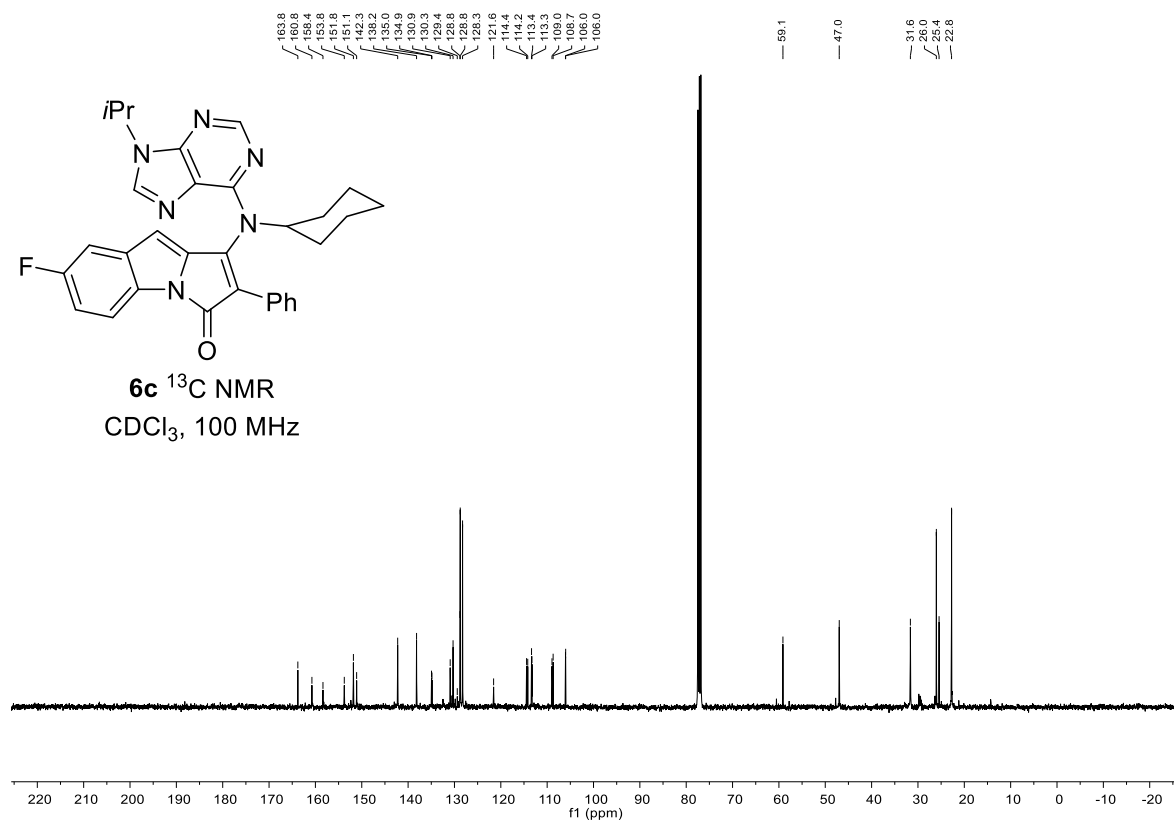

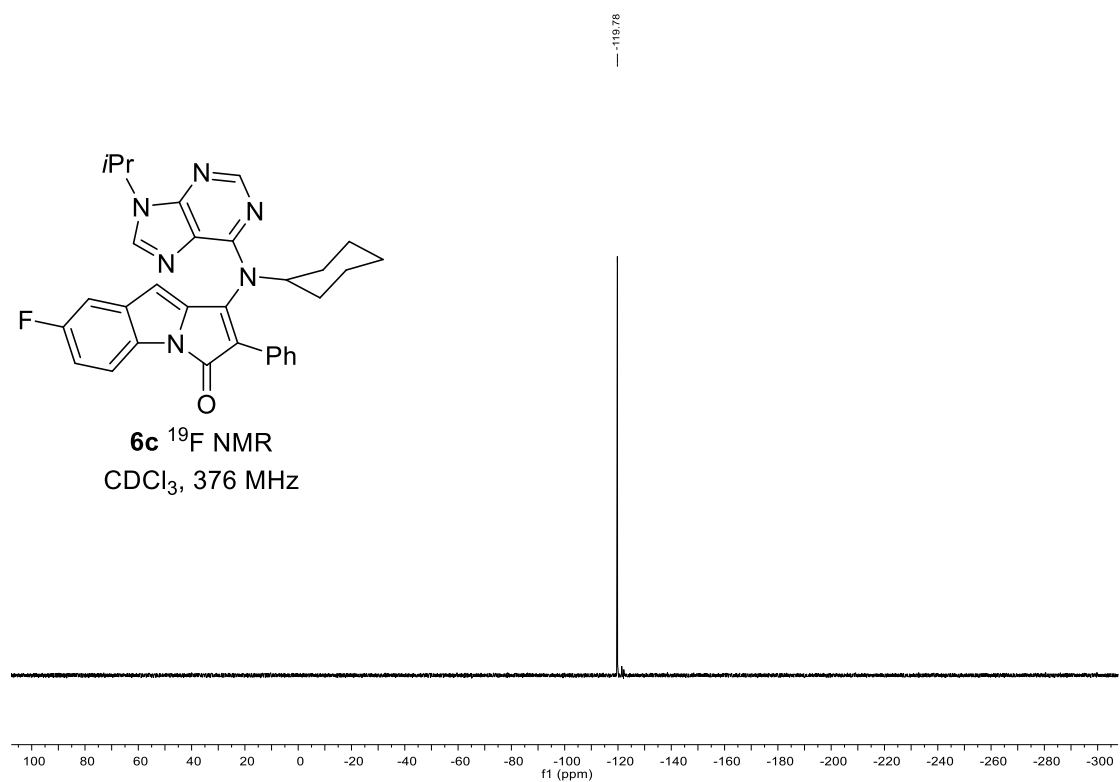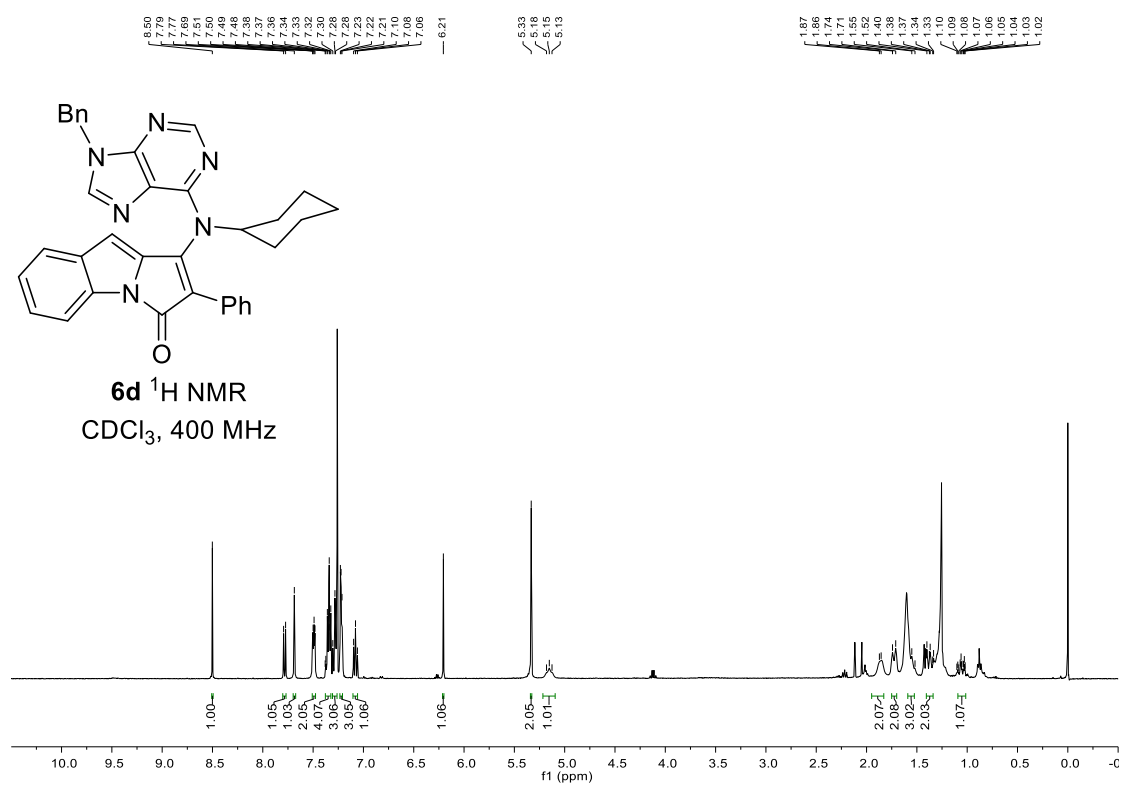

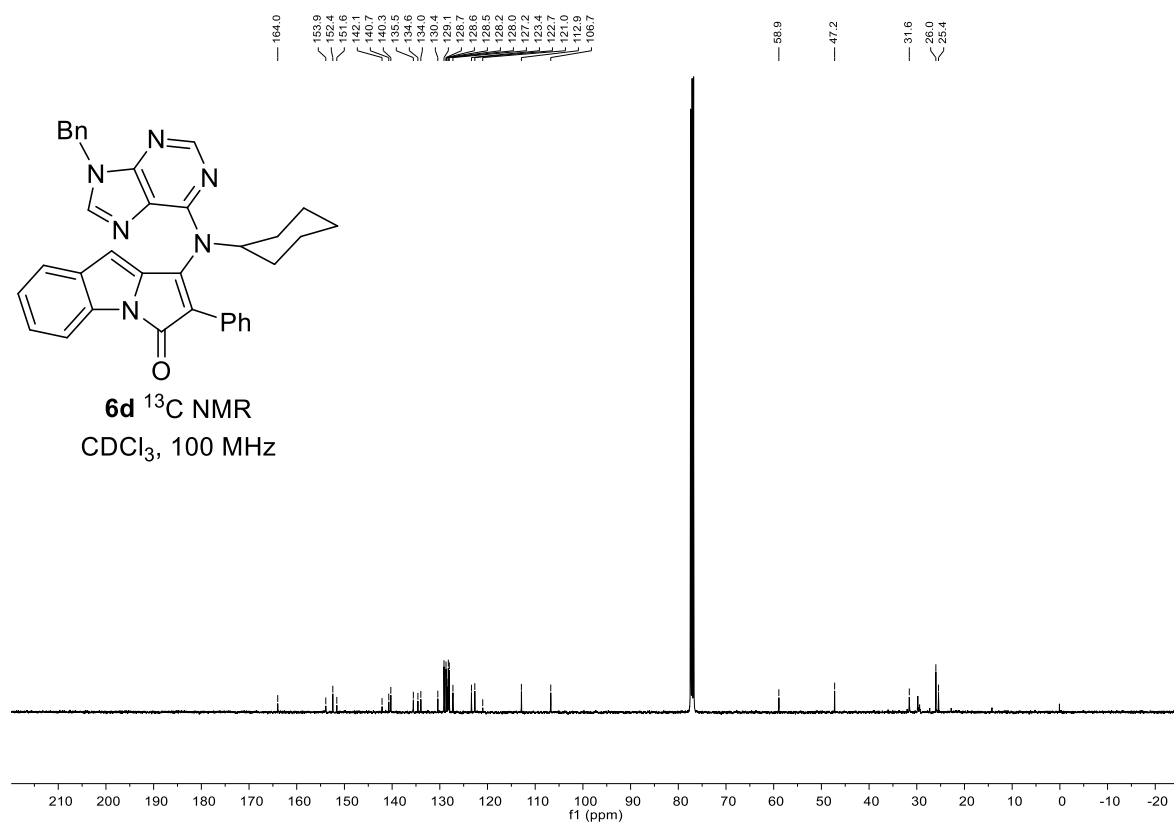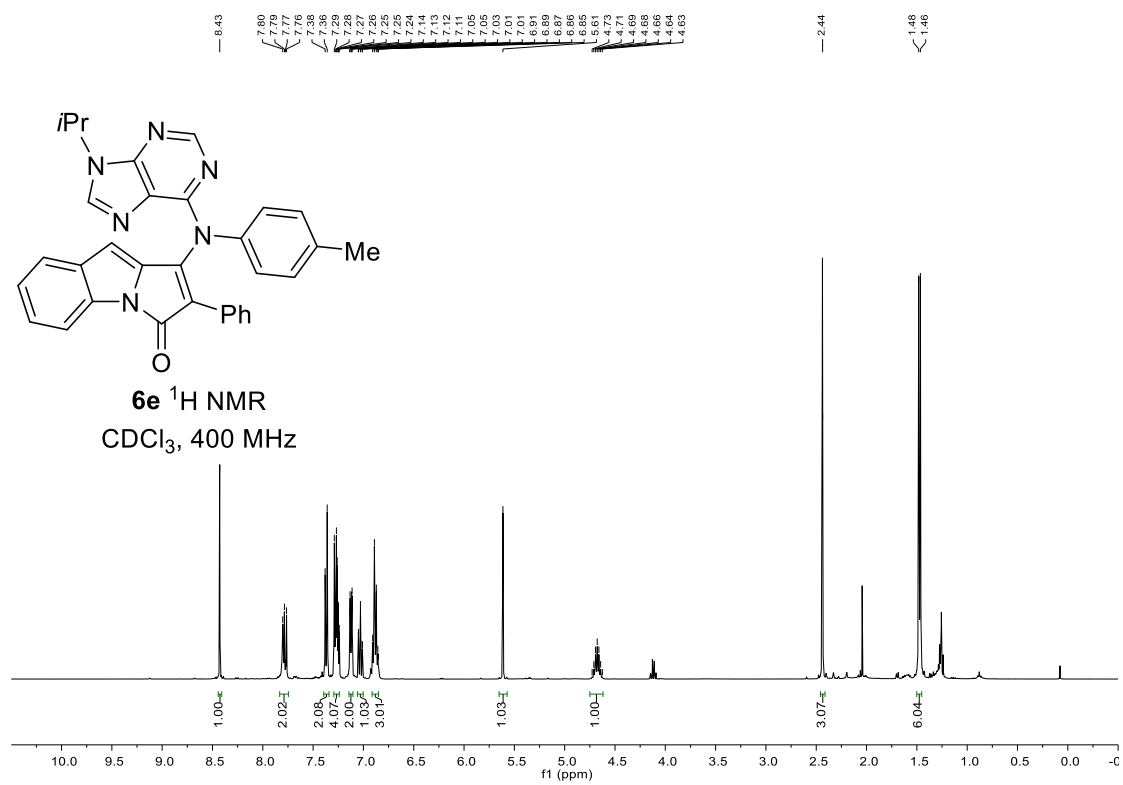

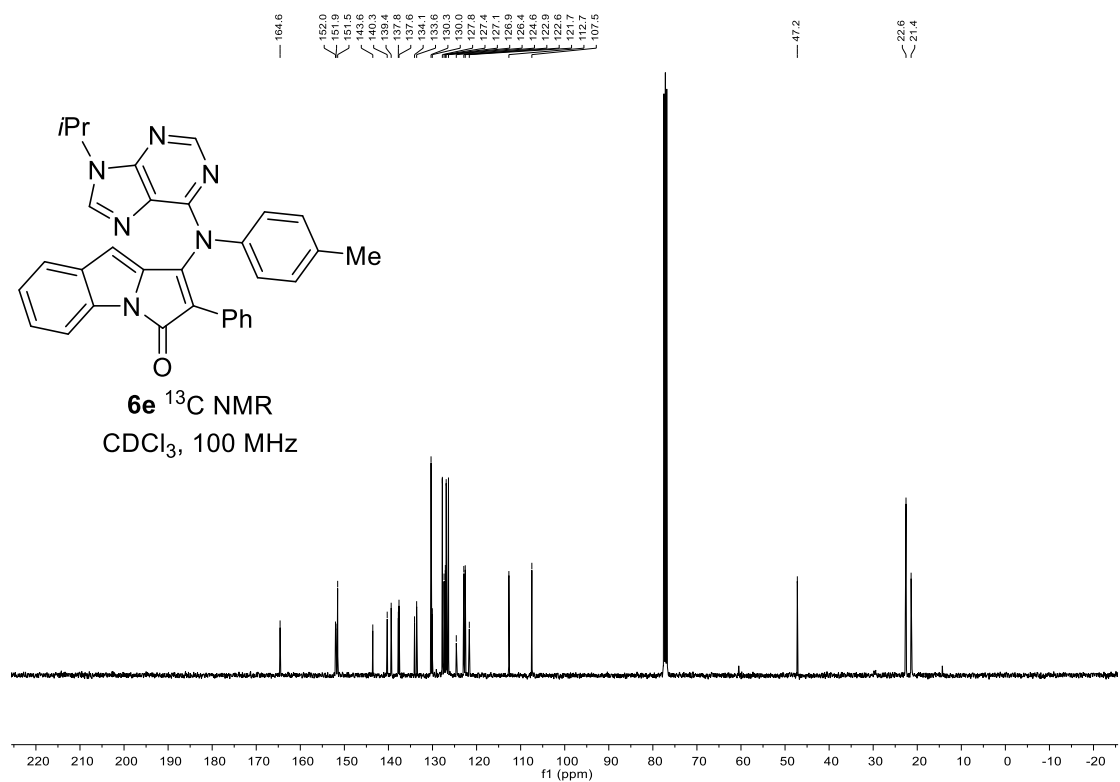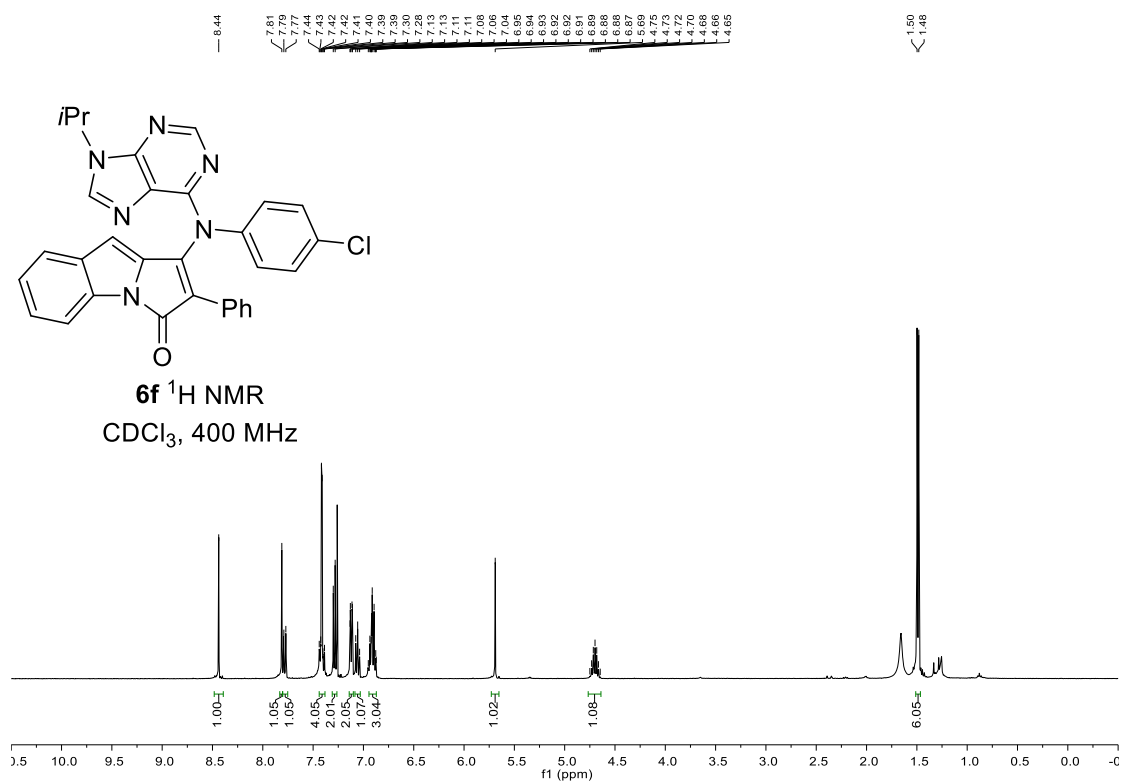

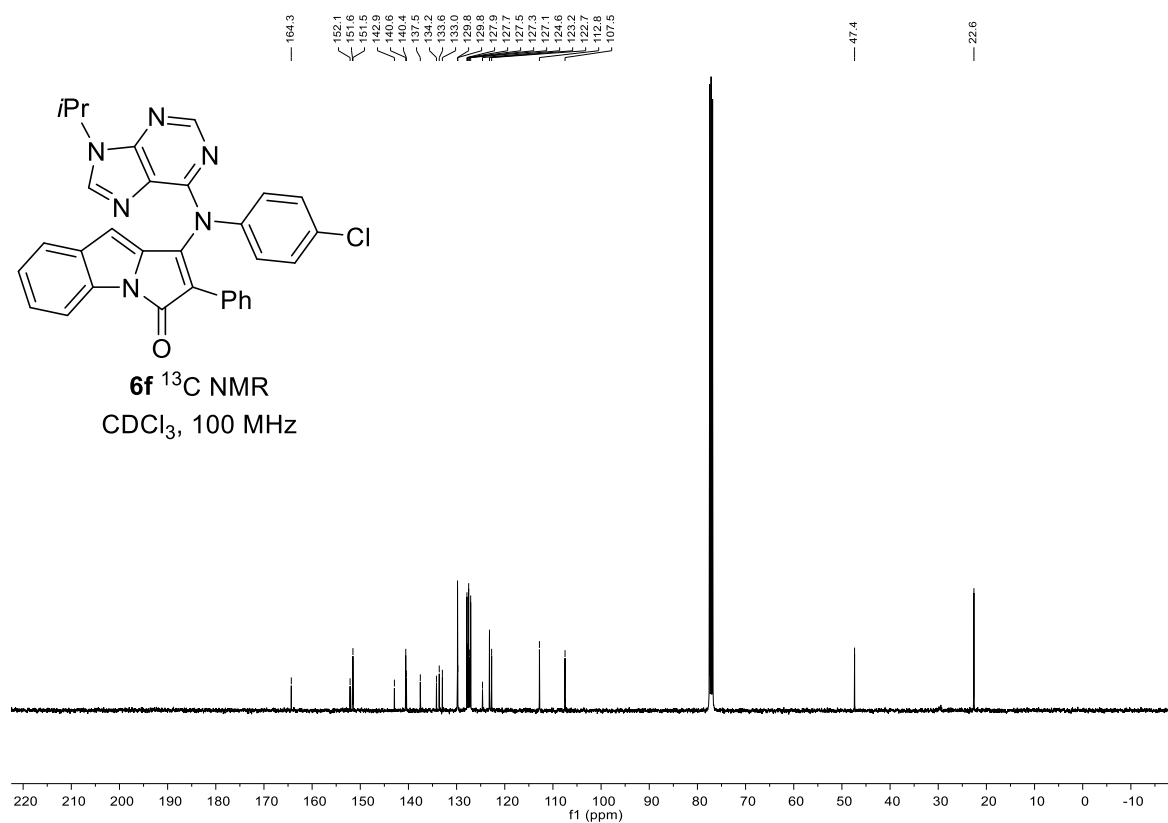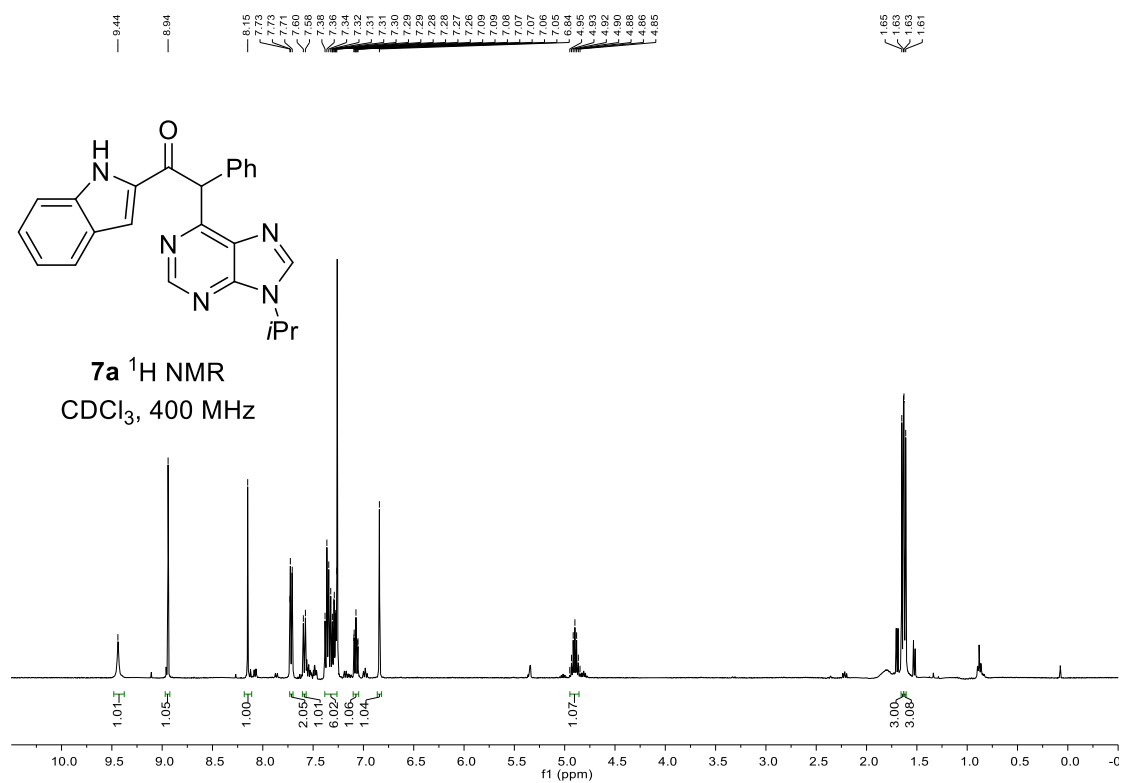

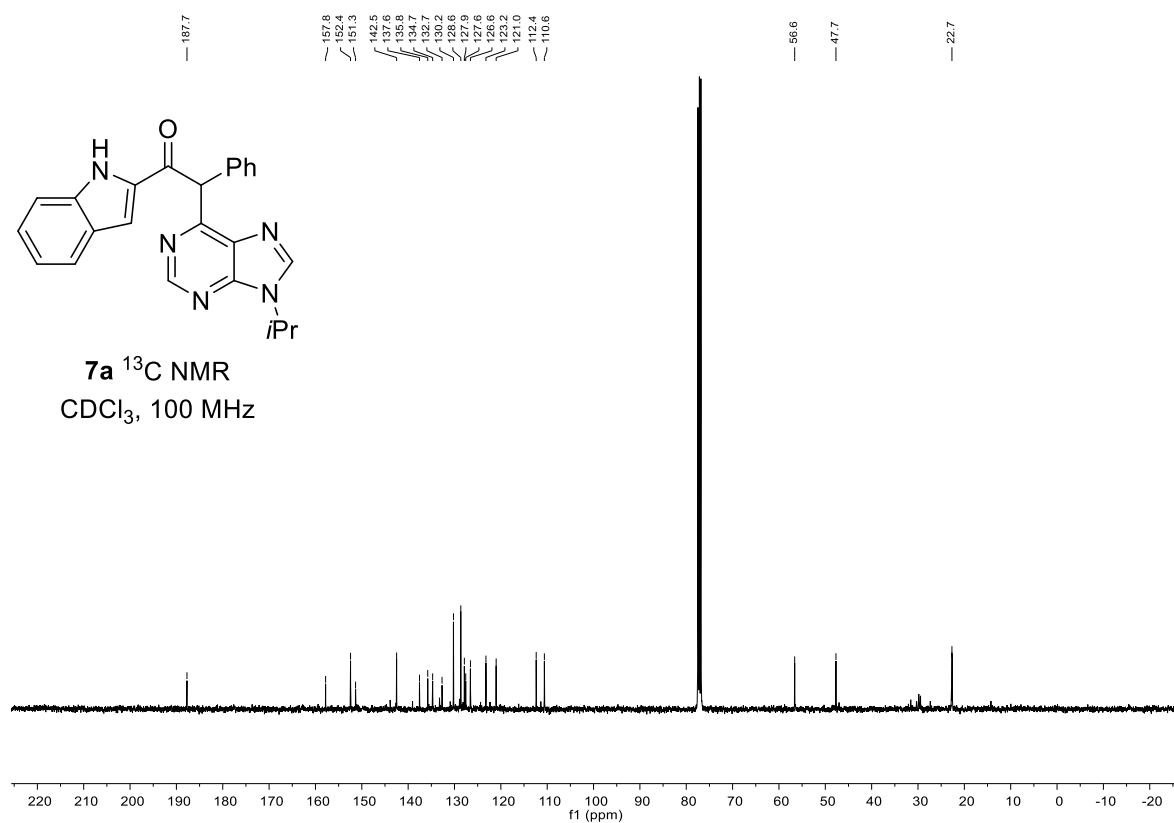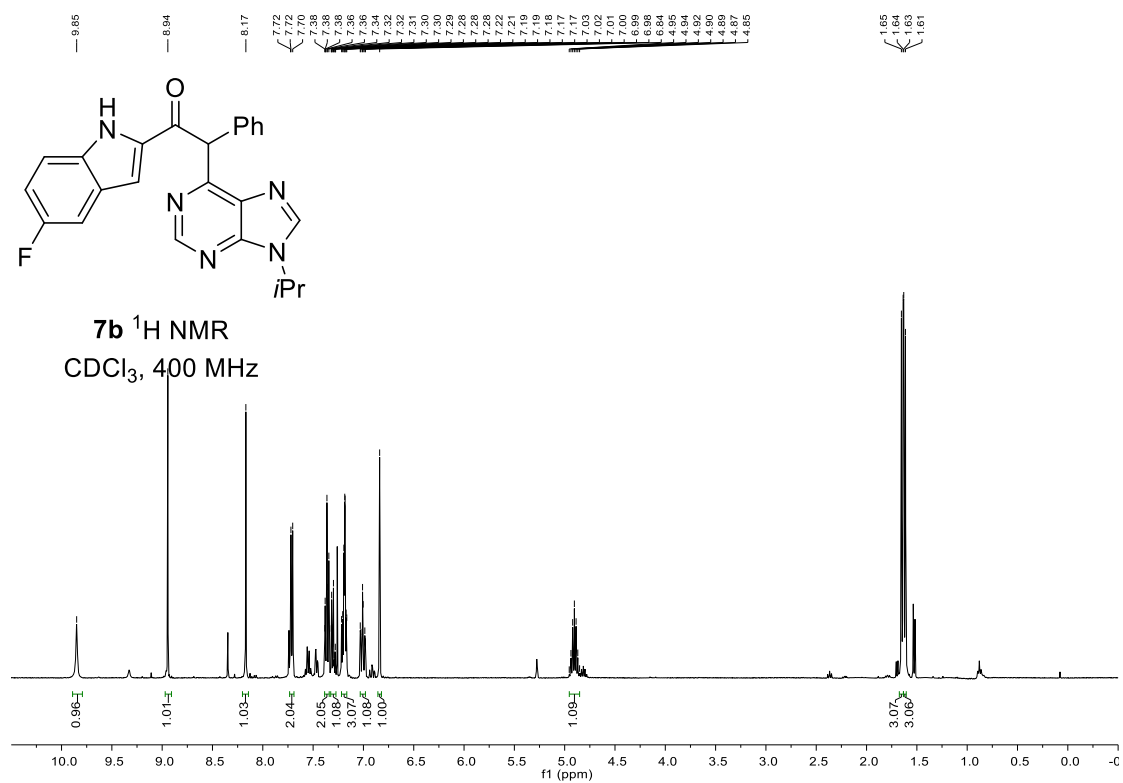



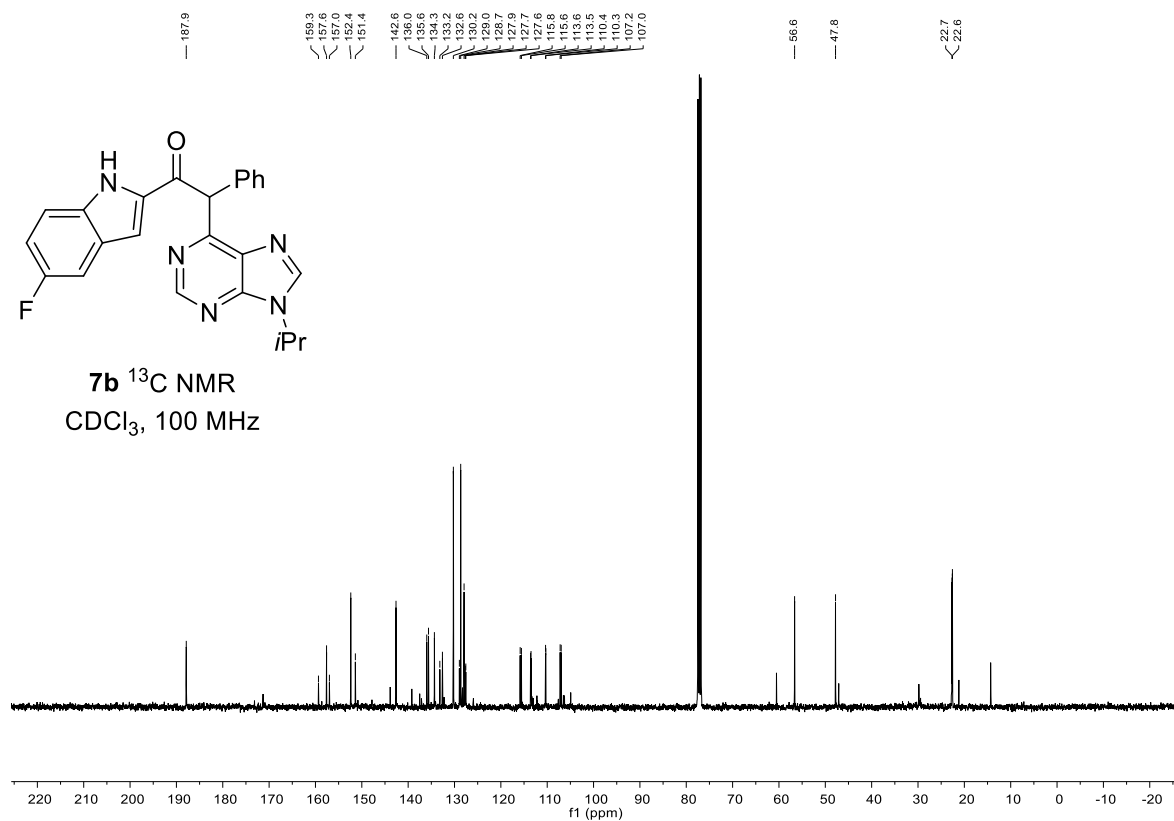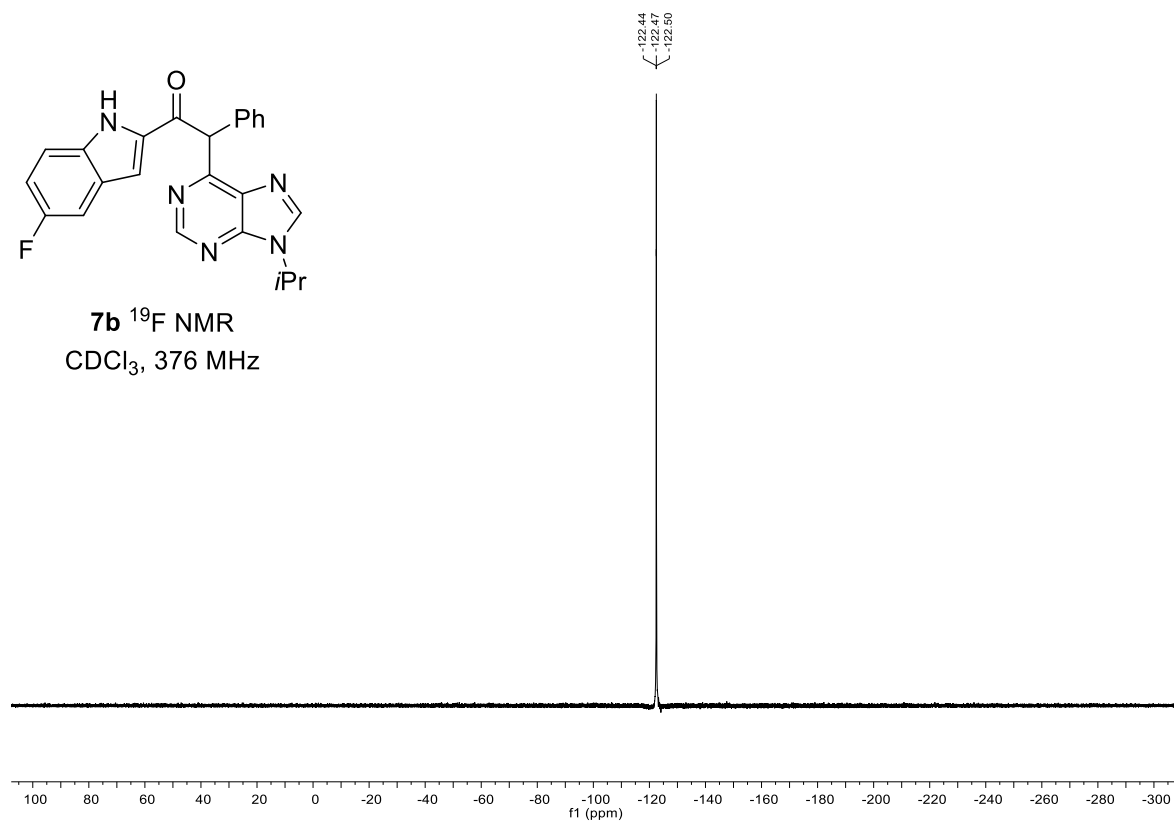

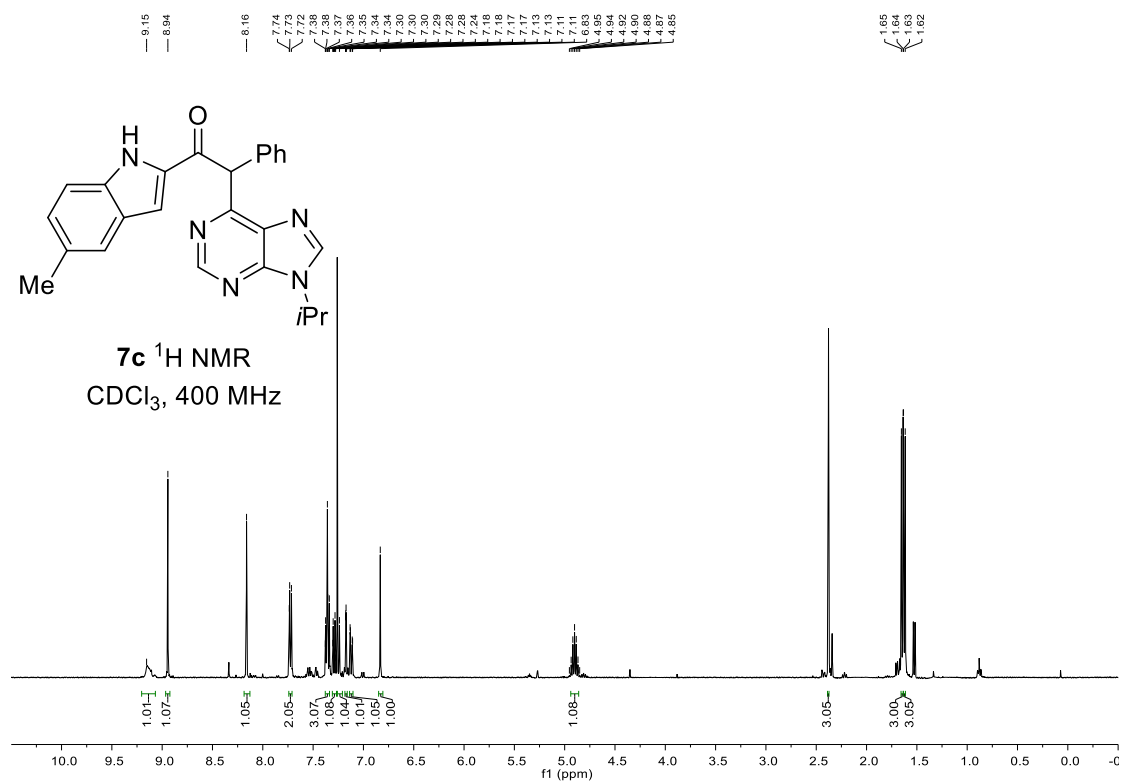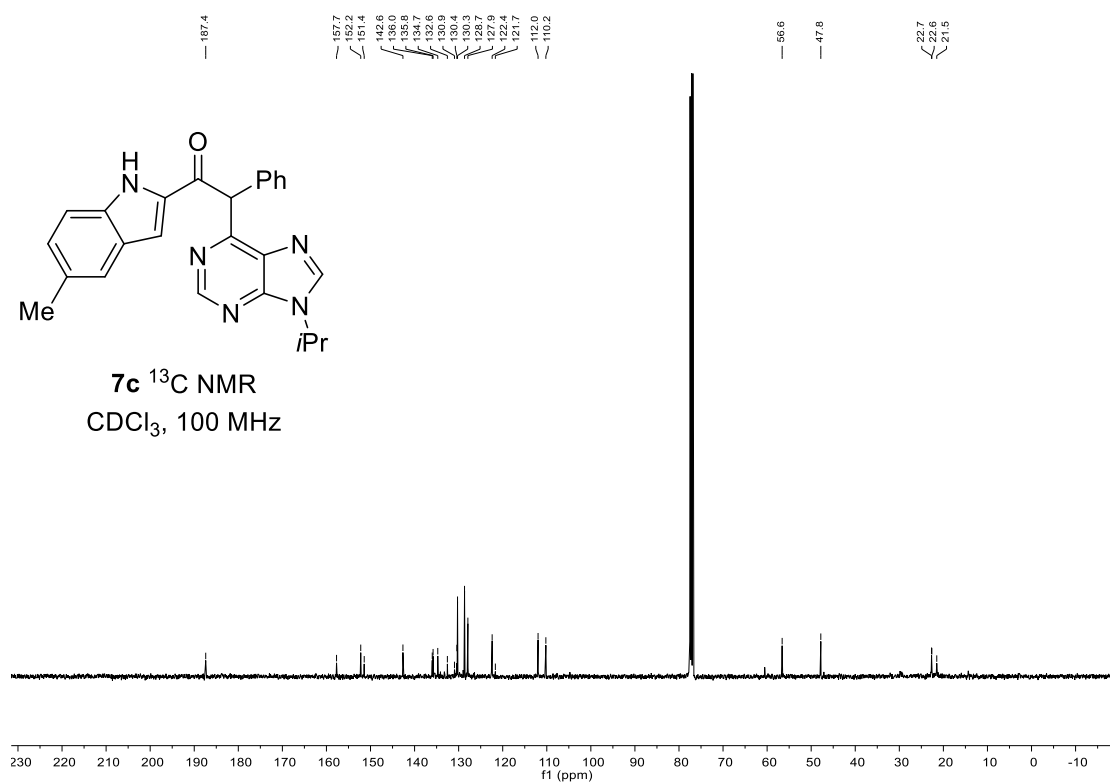

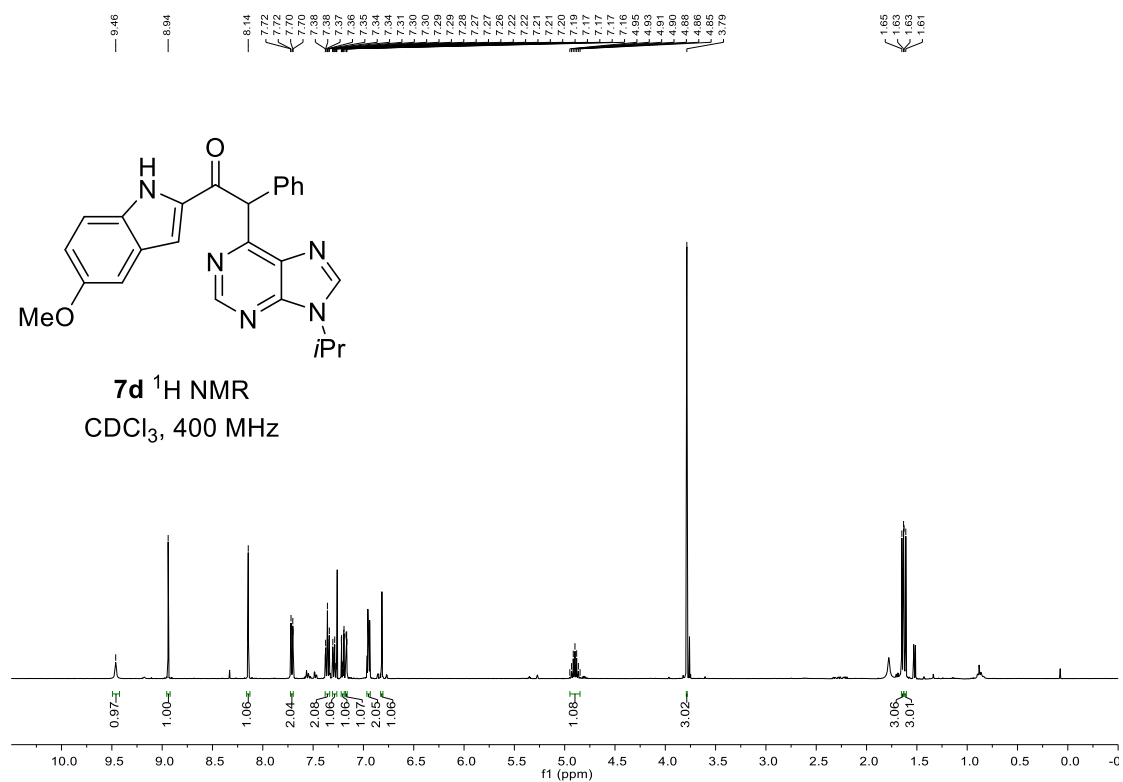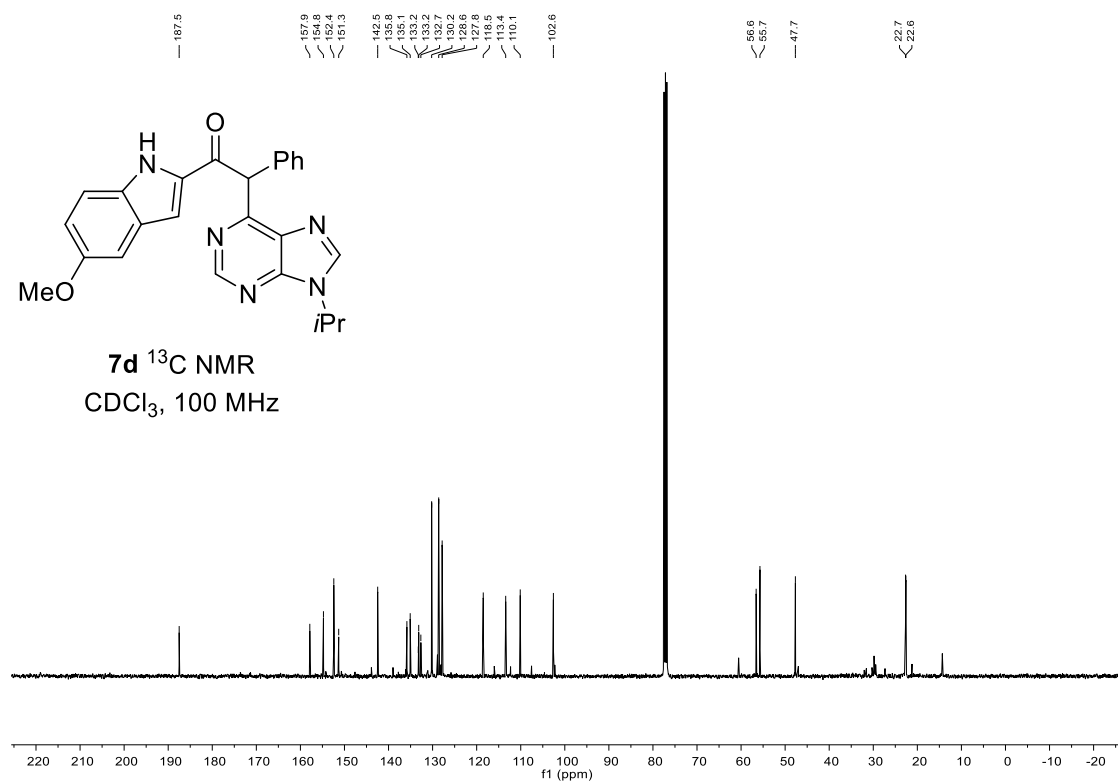

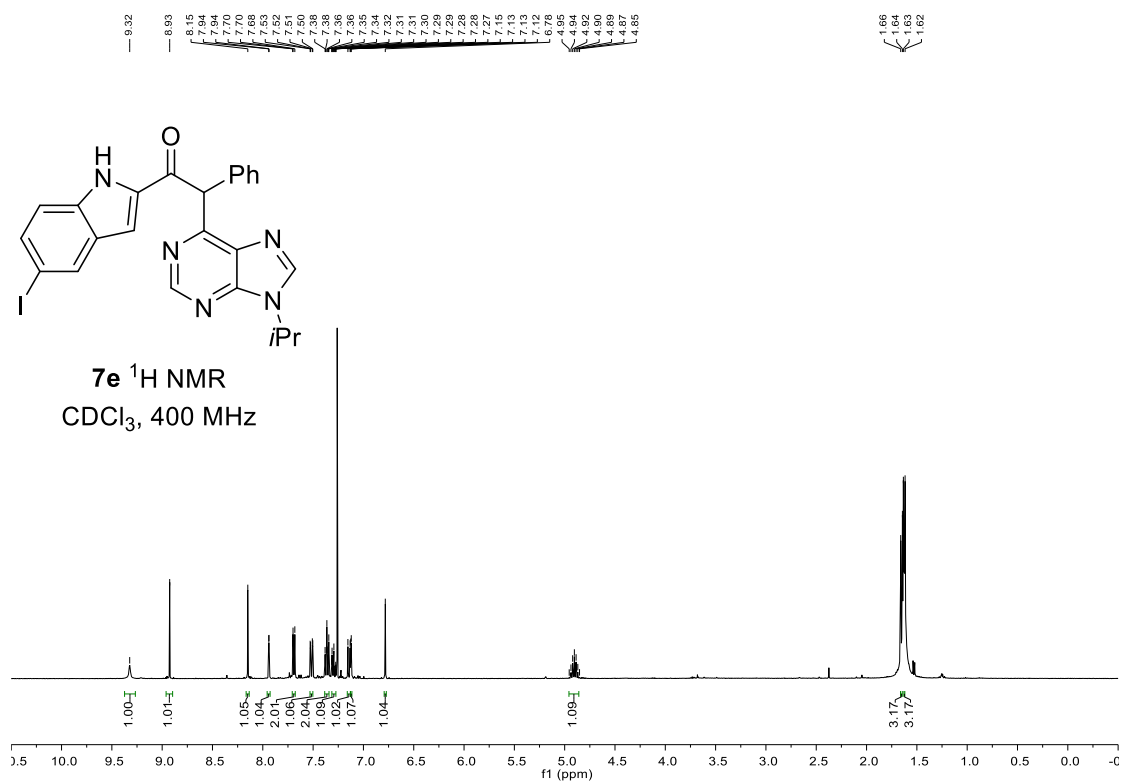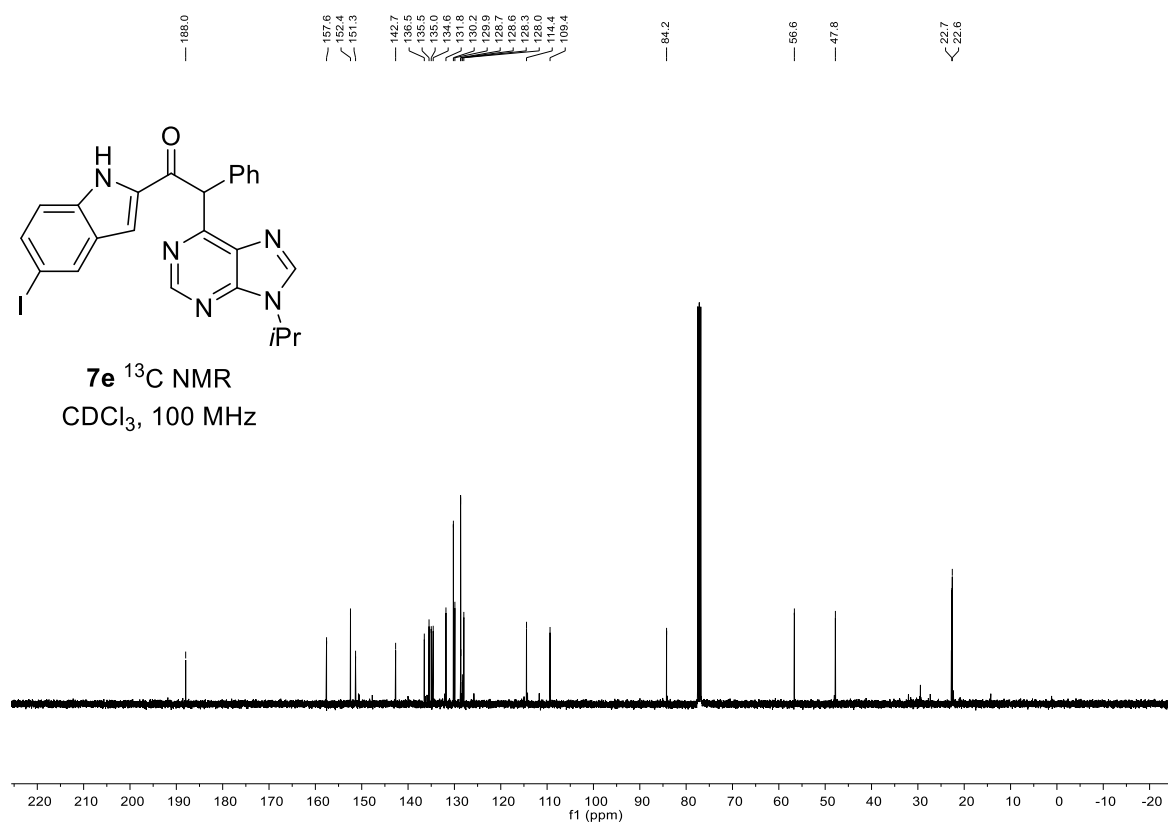

Supplement: d0qo01120g1.pdf [file d0qo01120g1.pdf]
